# Supplementary material for: Phytosterol, Lipid and Phenolic Composition, and Biological Activities of Guava Seed Oil
Source: MDPI journal article supplement (doi:10.3390/molecules25112474), 2020-05-27

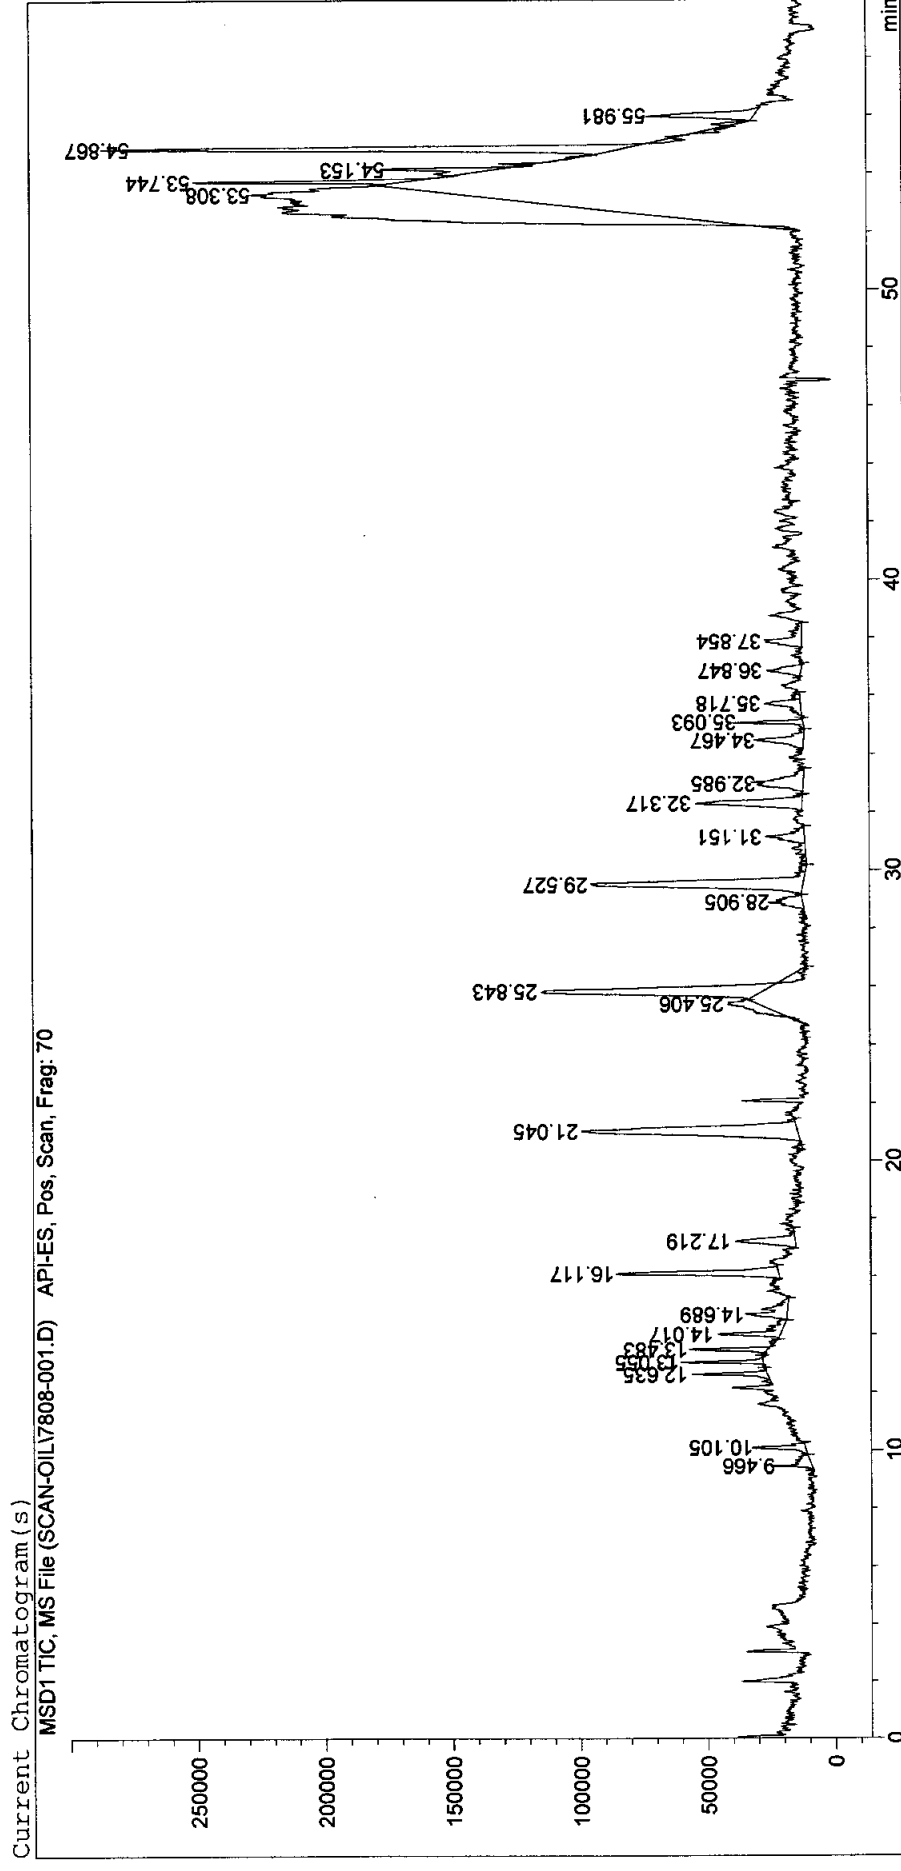

น้ำมันดิบ  
(Heavy oil)

0756/07802-001

## Integration Results

Signal 1: MSD1 TIC, MS File

| Peak # | Time [min] | Type | Area      | Height    | Width [min] | Start [min] | End [min] |
|--------|------------|------|-----------|-----------|-------------|-------------|-----------|
| 1      | 9.466      | BB   | 1.53318e5 | 1.21966e4 | 0.1725      | 9.288       | 9.860     |
| 2      | 10.105     | BB   | 1.74050e5 | 1.79398e4 | 0.1605      | 9.860       | 10.286    |
| 3      | 12.635     | BB   | 1.84713e5 | 2.90229e4 | 0.1104      | 12.268      | 12.859    |
| 4      | 13.055     | BB   | 1.51539e5 | 3.04724e4 | 0.0869      | 12.859      | 13.286    |
| 5      | 13.483     | BB   | 1.80435e5 | 2.89744e4 | 0.1016      | 13.286      | 13.842    |
| 6      | 14.017     | BB   | 2.54445e5 | 2.40059e4 | 0.1598      | 13.842      | 14.503    |
| 7      | 14.689     | BB   | 2.54204e5 | 1.43411e4 | 0.2430      | 14.503      | 15.265    |
| 8      | 16.117     | BB   | 6.49376e5 | 6.21532e4 | 0.1653      | 15.889      | 16.395    |
| 9      | 17.219     | BB   | 3.18340e5 | 2.29515e4 | 0.2197      | 16.978      | 17.692    |
| 10     | 21.045     | BB   | 1.59604e6 | 8.38974e4 | 0.3015      | 20.375      | 21.479    |
| 11     | 25.843     | BB   | 1.28623e6 | 8.63099e4 | 0.2463      | 25.553      | 26.680    |
| 12     | 28.905     | BB   | 1.99554e5 | 1.08278e4 | 0.3164      | 28.359      | 29.161    |
| 13     | 29.527     | BB   | 1.37631e6 | 8.23881e4 | 0.2673      | 29.161      | 30.184    |
| 14     | 31.151     | BB   | 3.05829e5 | 1.45256e4 | 0.2818      | 30.184      | 31.523    |
| 15     | 32.317     | BB   | 5.42999e5 | 4.13174e4 | 0.2113      | 32.016      | 32.643    |
| 16     | 32.985     | BB   | 3.79396e5 | 1.63159e4 | 0.3365      | 32.643      | 33.514    |
| 17     | 34.467     | BB   | 2.60752e5 | 1.68893e4 | 0.2236      | 34.139      | 34.859    |
| 18     | 35.093     | BB   | 1.80178e5 | 2.39055e4 | 0.1233      | 34.859      | 35.251    |
| 19     | 35.718     | BB   | 2.18514e5 | 1.33906e4 | 0.2338      | 35.251      | 36.125    |
| 20     | 36.847     | BB   | 1.60442e5 | 1.28862e4 | 0.2103      | 36.580      | 37.115    |
| 21     | 37.854     | BB   | 2.43069e5 | 1.35835e4 | 0.2666      | 37.601      | 38.502    |
| 22     | 53.308     | BB   | 7.25794e6 | 7.97063e4 | 1.1202      | 52.023      | 53.621    |
| 23     | 53.744     | BB   | 4.50582e5 | 8.19036e4 | 0.0931      | 53.621      | 53.944    |
| 24     | 54.153     | BB   | 3.65551e5 | 4.01932e4 | 0.1423      | 53.944      | 54.638    |
| 25     | 54.867     | BB   | 1.81503e6 | 2.03478e5 | 0.1475      | 54.638      | 55.791    |
| 26     | 55.981     | BBA  | 4.66310e5 | 4.00731e4 | 0.1864      | 55.791      | 56.344    |

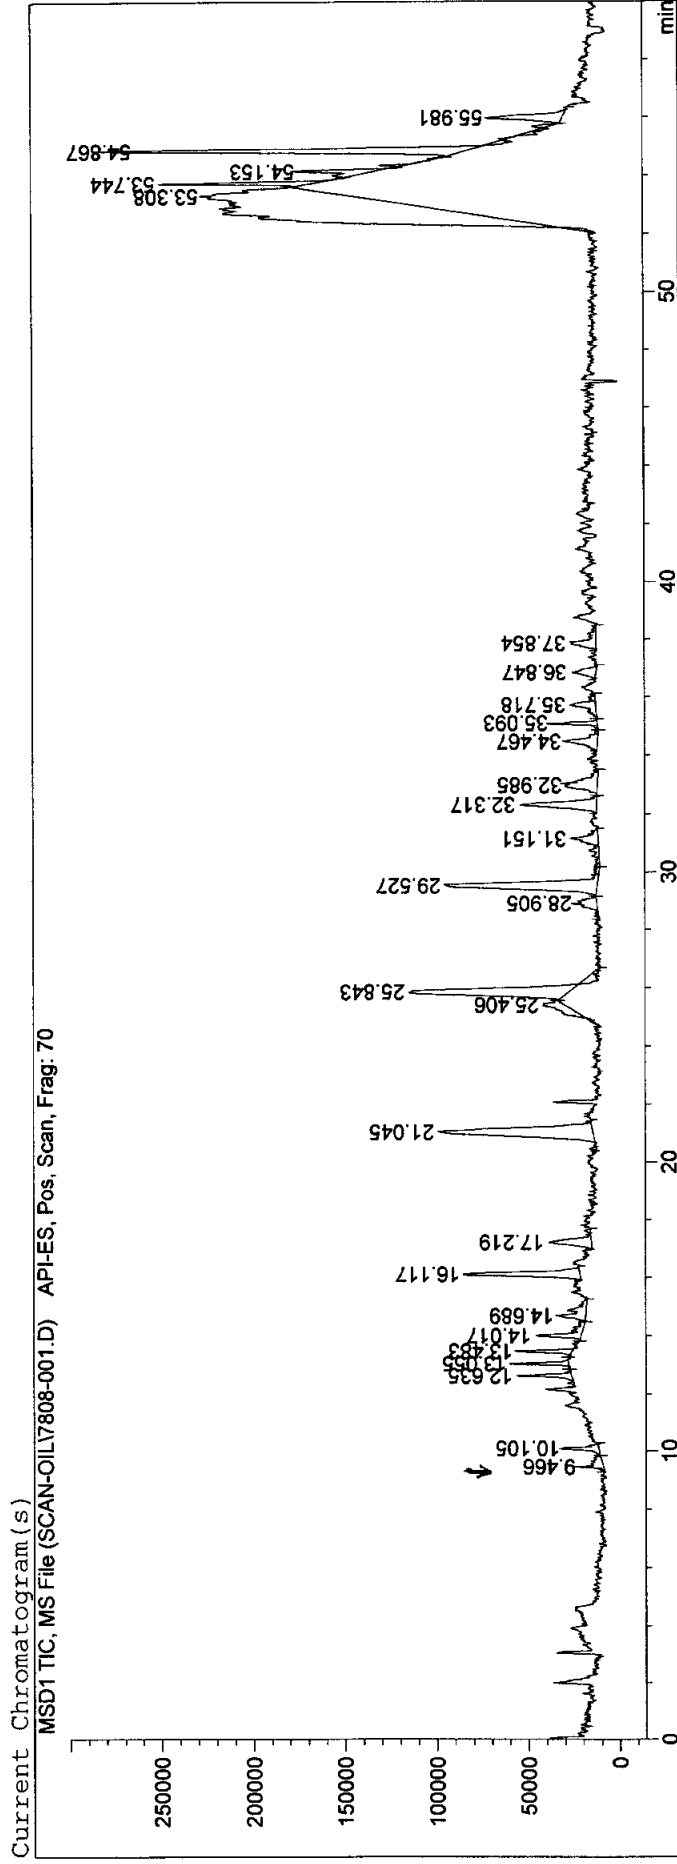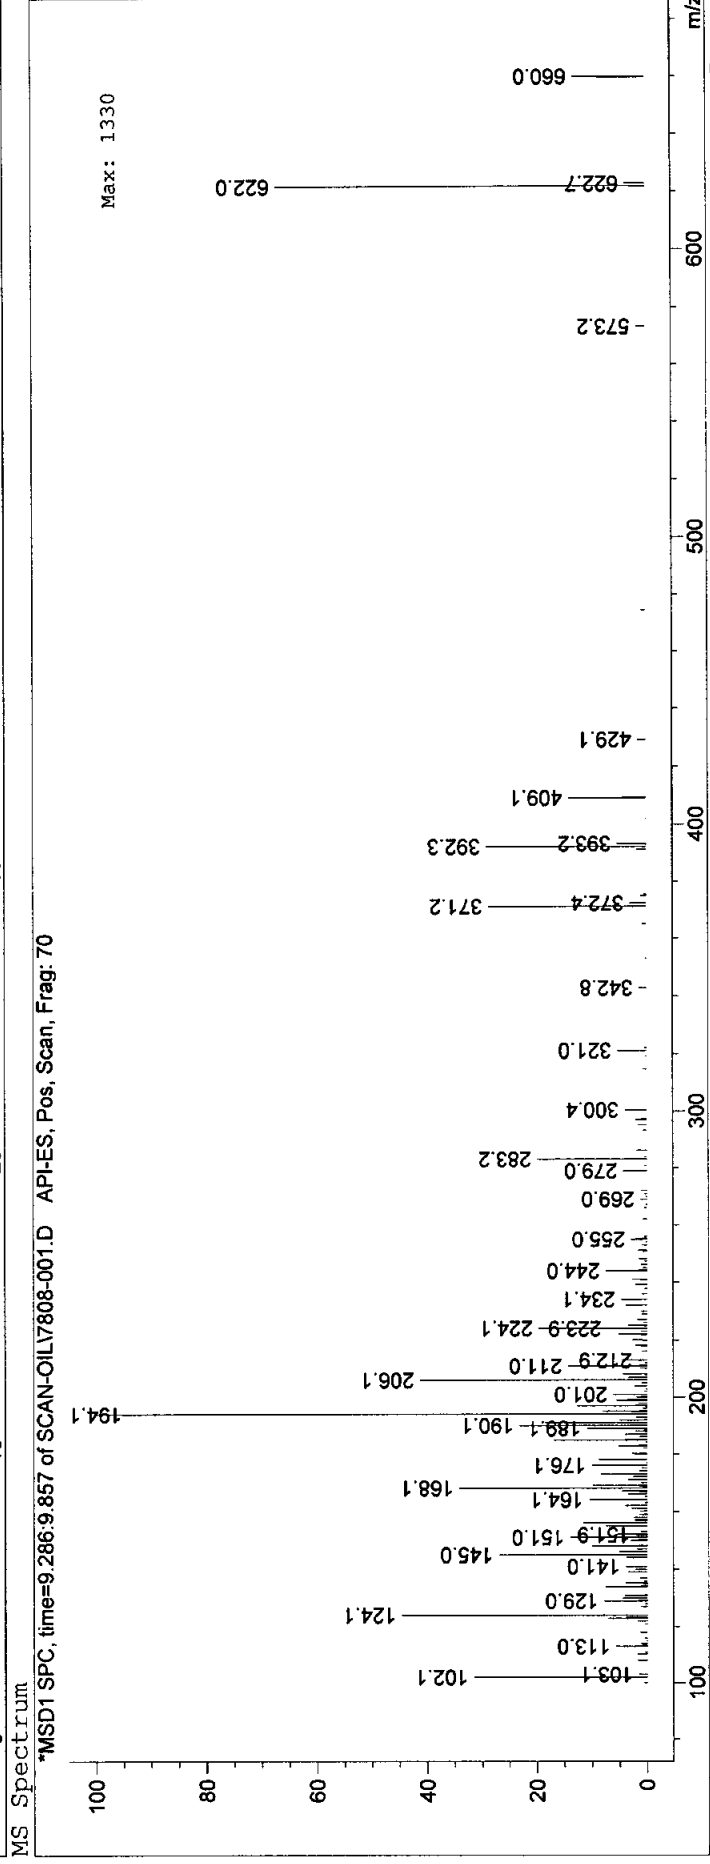

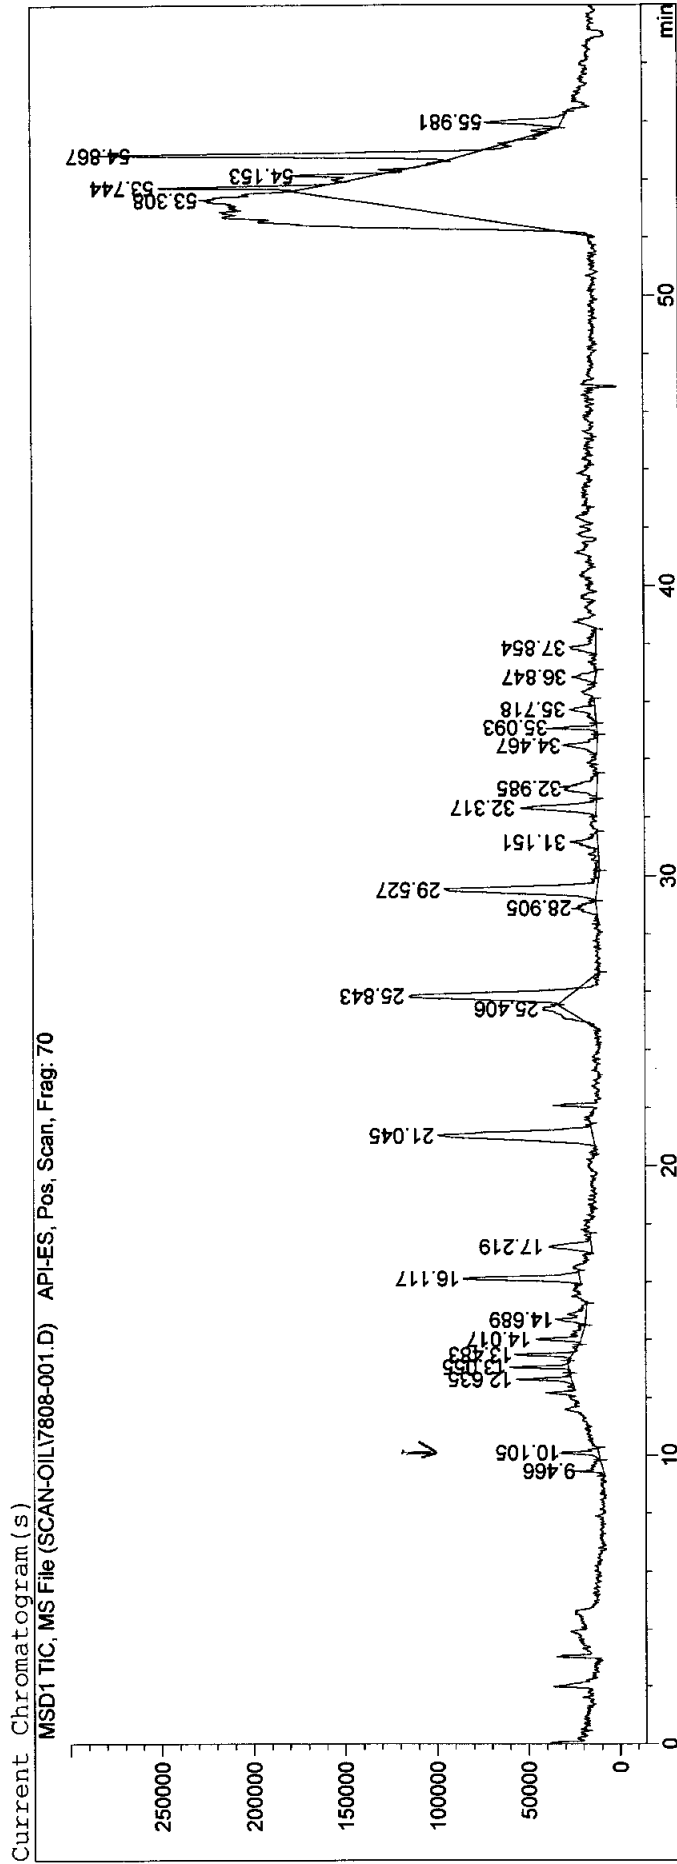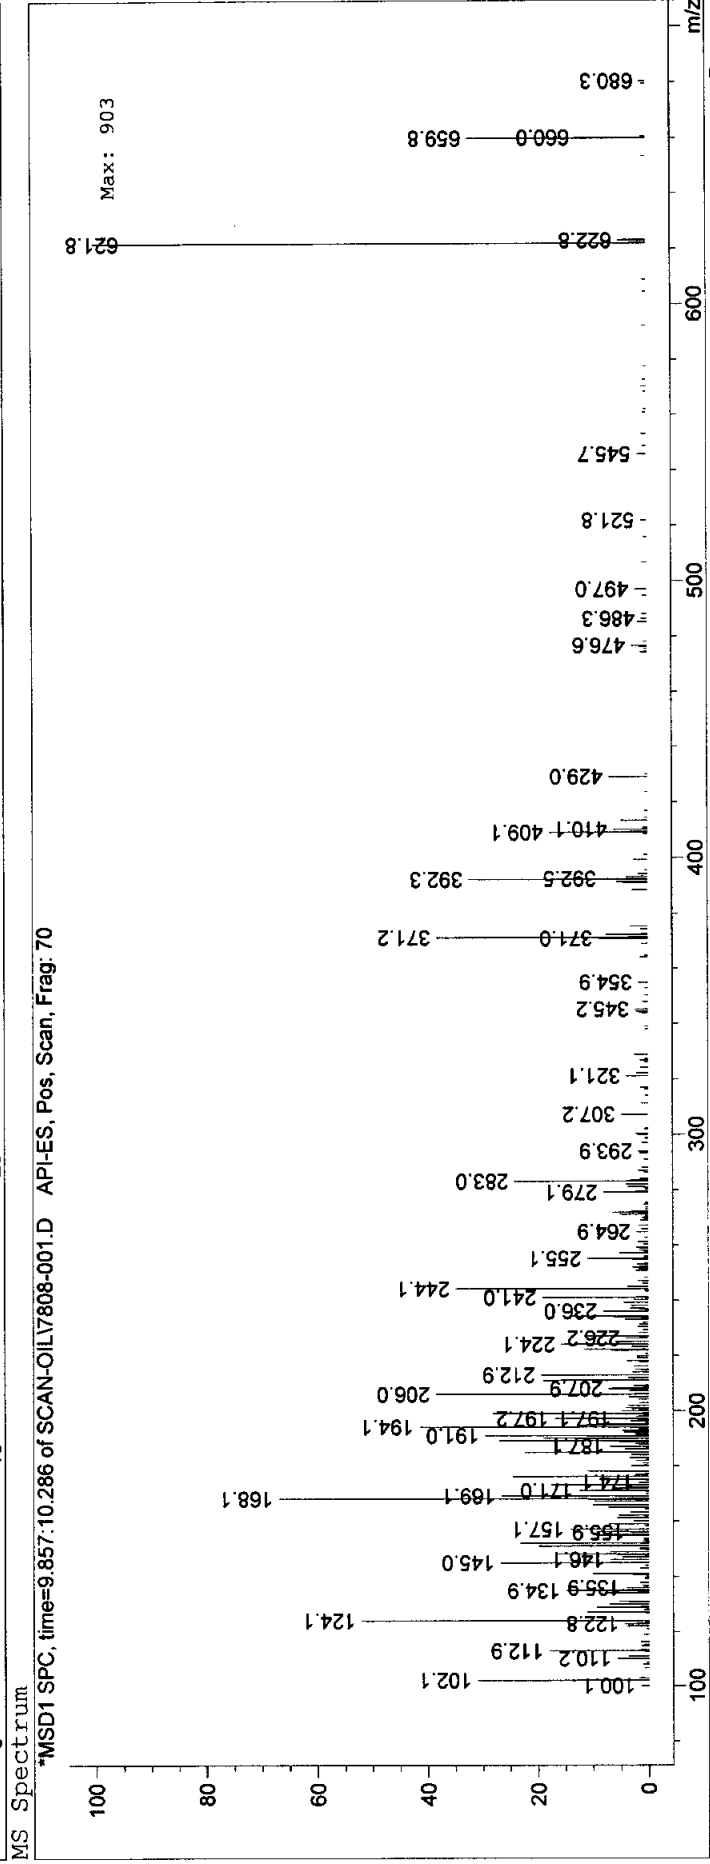

Current Chromatogram(s)  
MSD1 TIC, MS File (SCAN-OILV7808-001.D) API-ES, Pos, Scan, Frag: 70

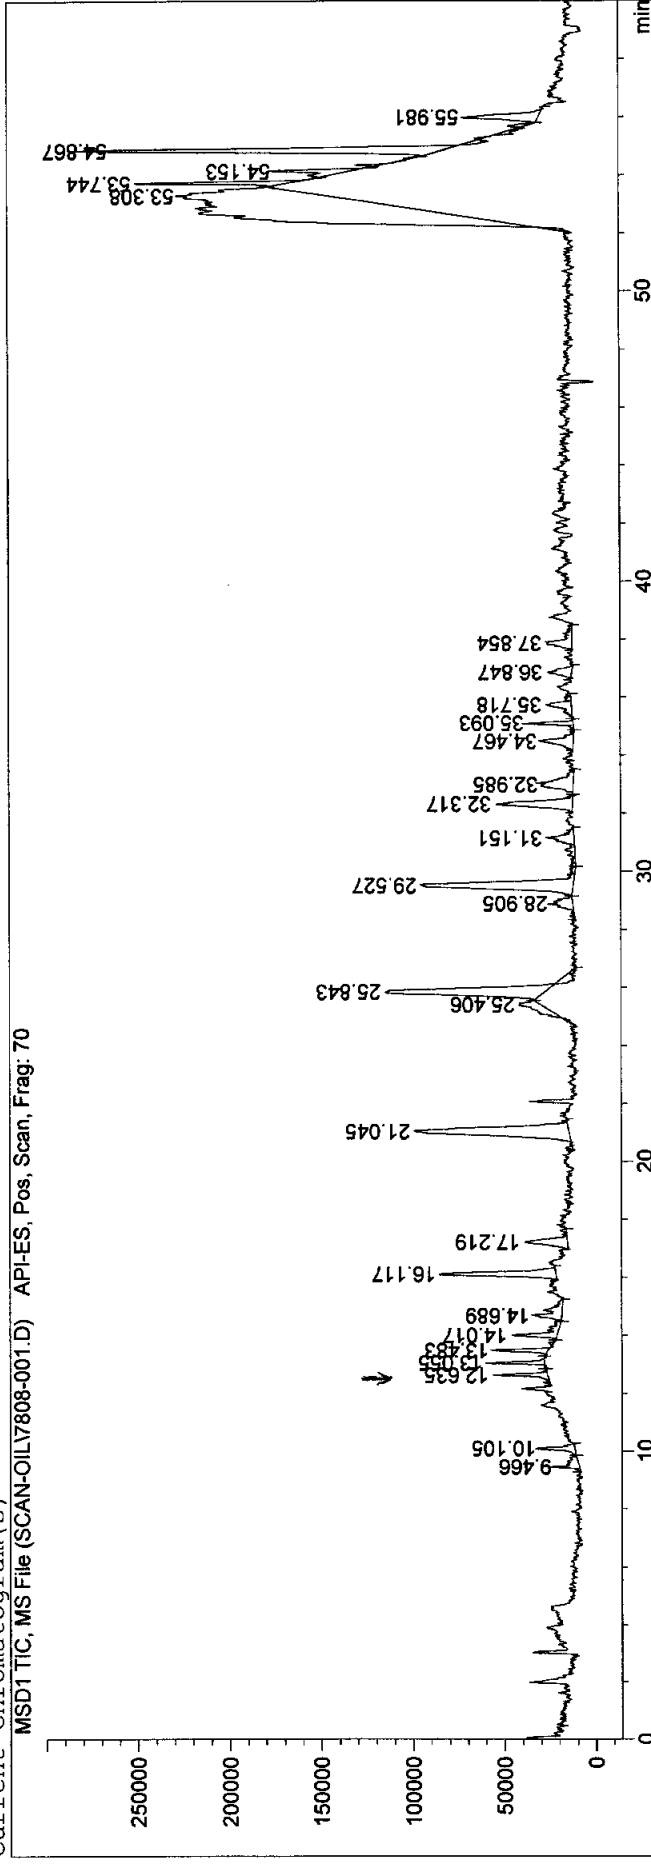

MS Spectrum  
\*MSD1 SPC, time=12.262:12.853 of SCAN-OILV7808-001.D API-ES, Pos, Scan, Frag: 70

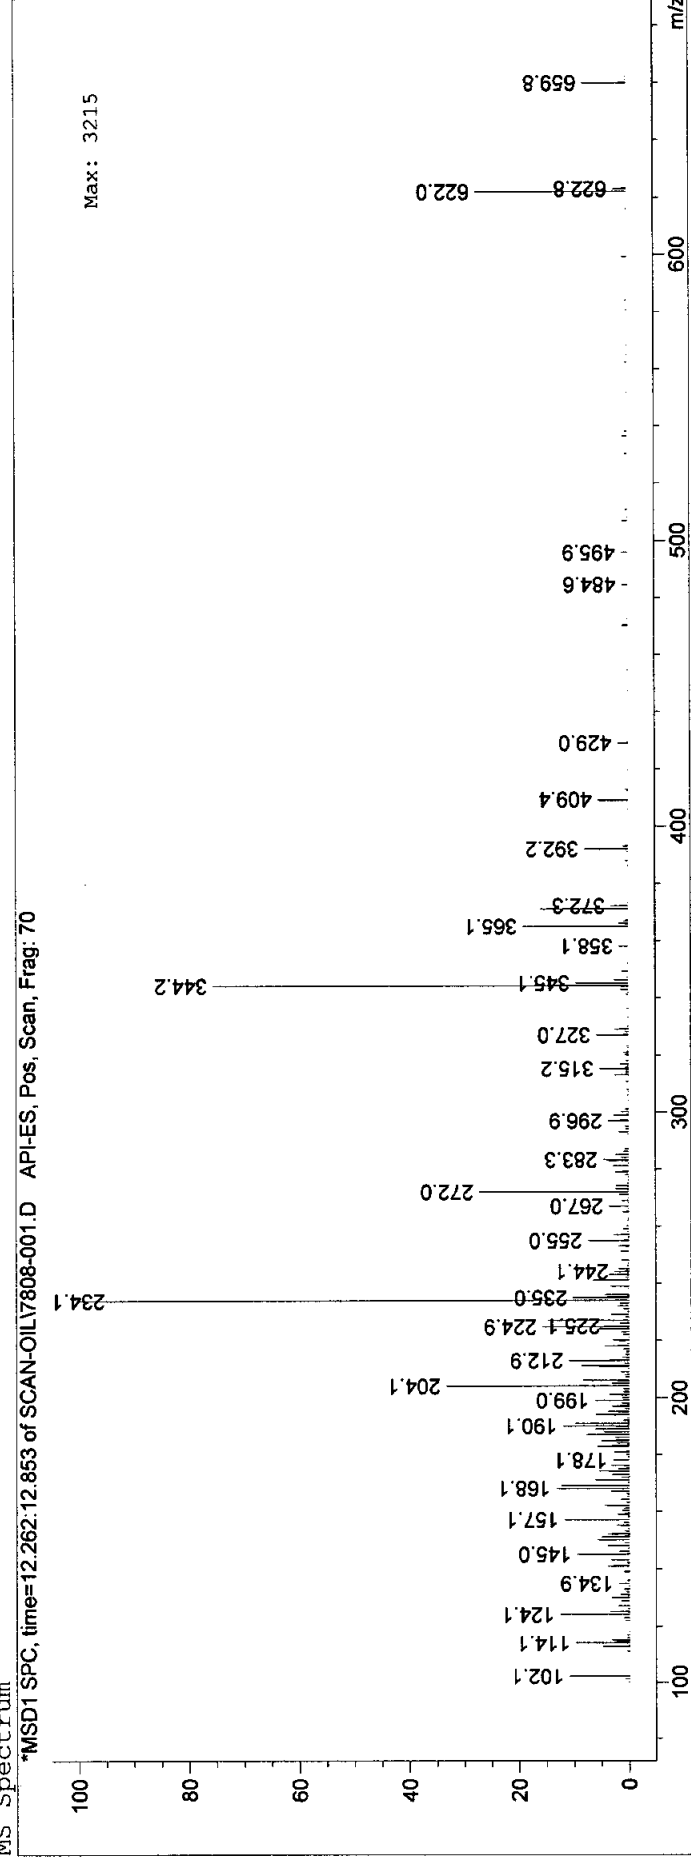

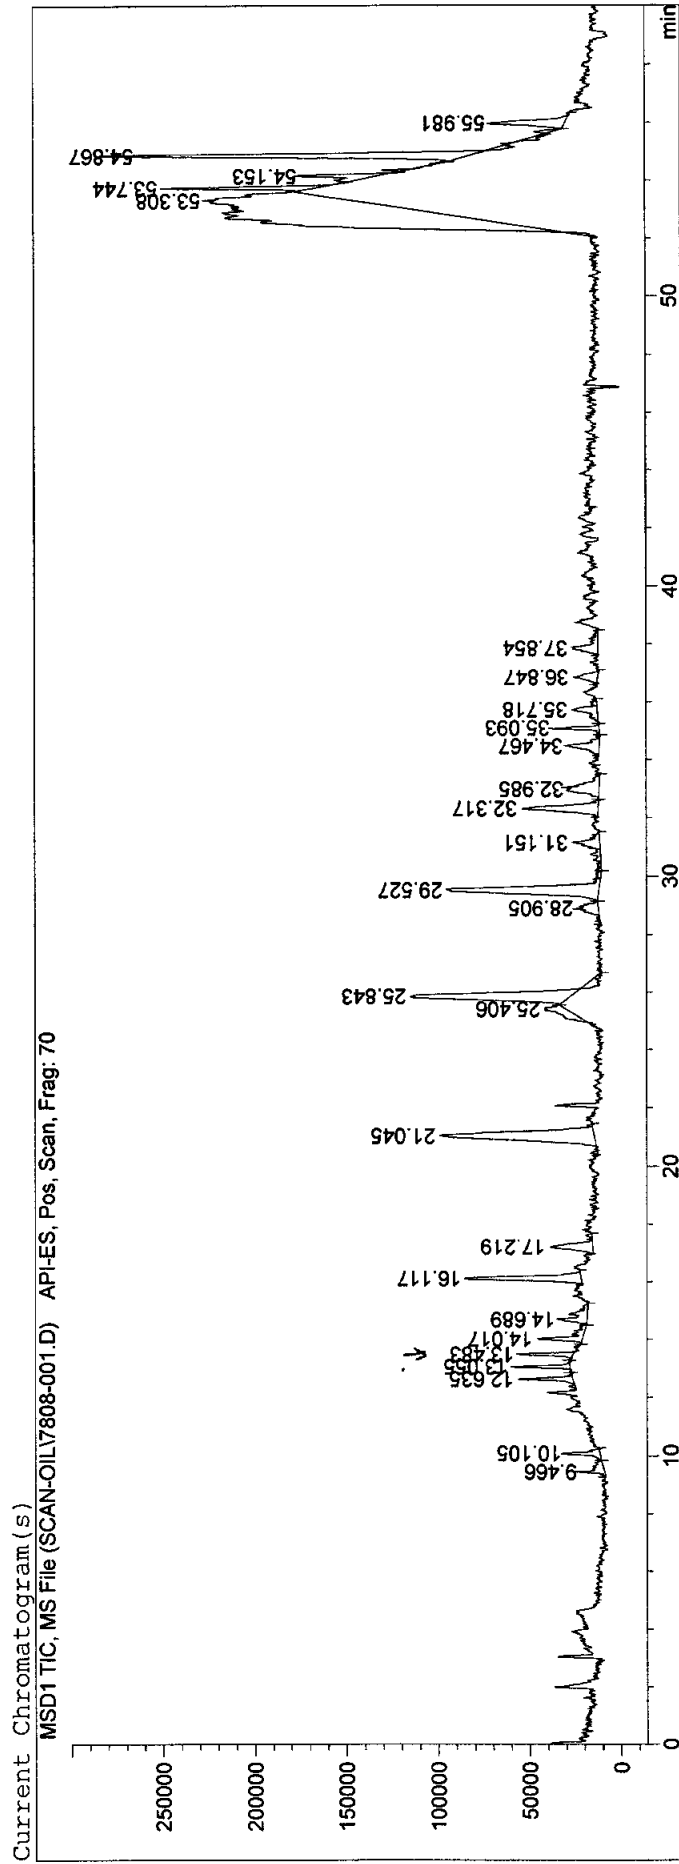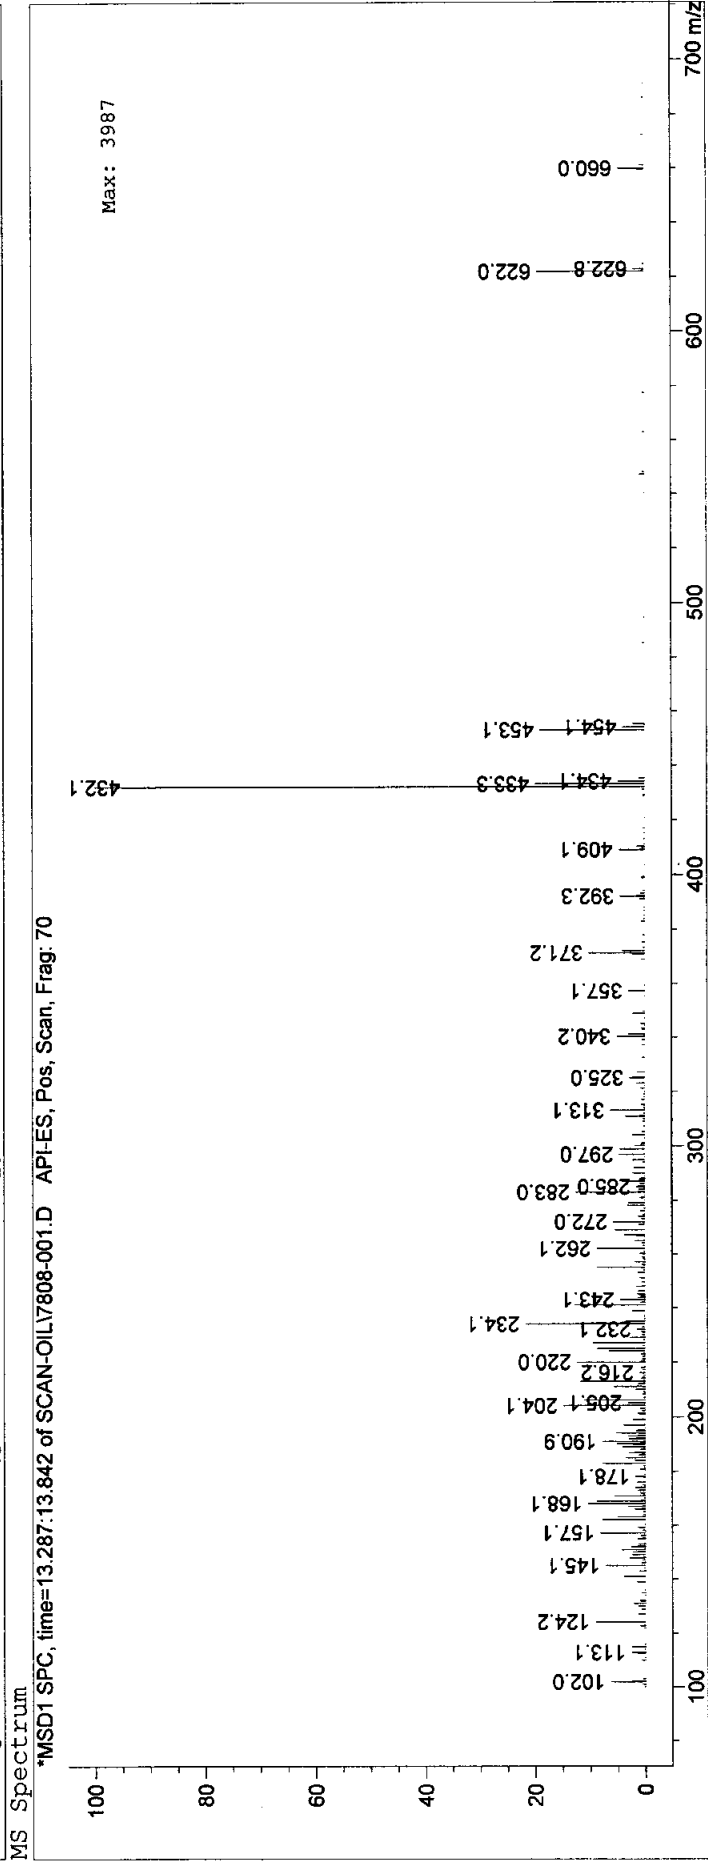

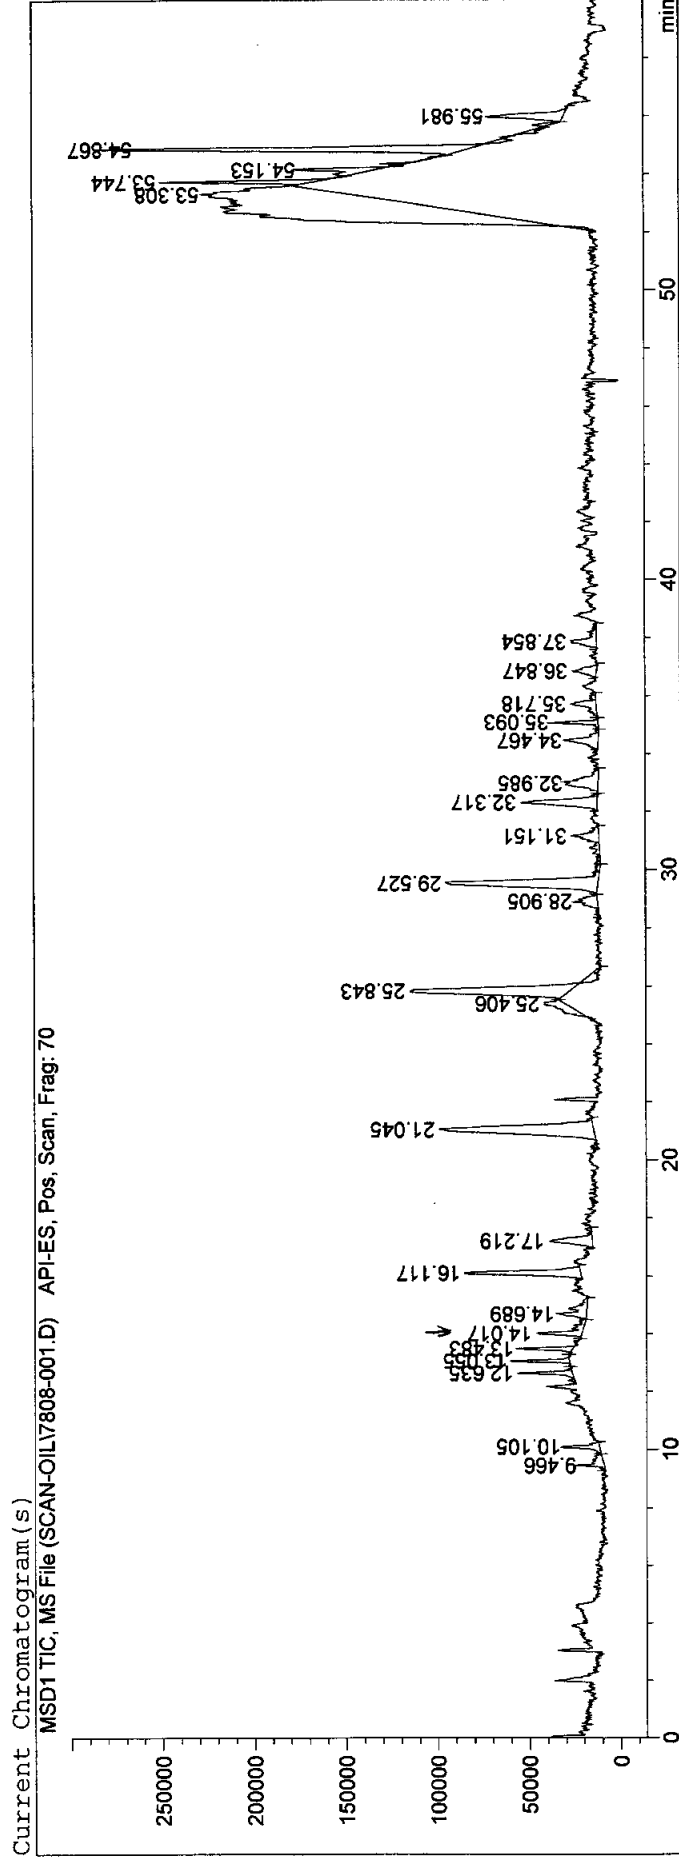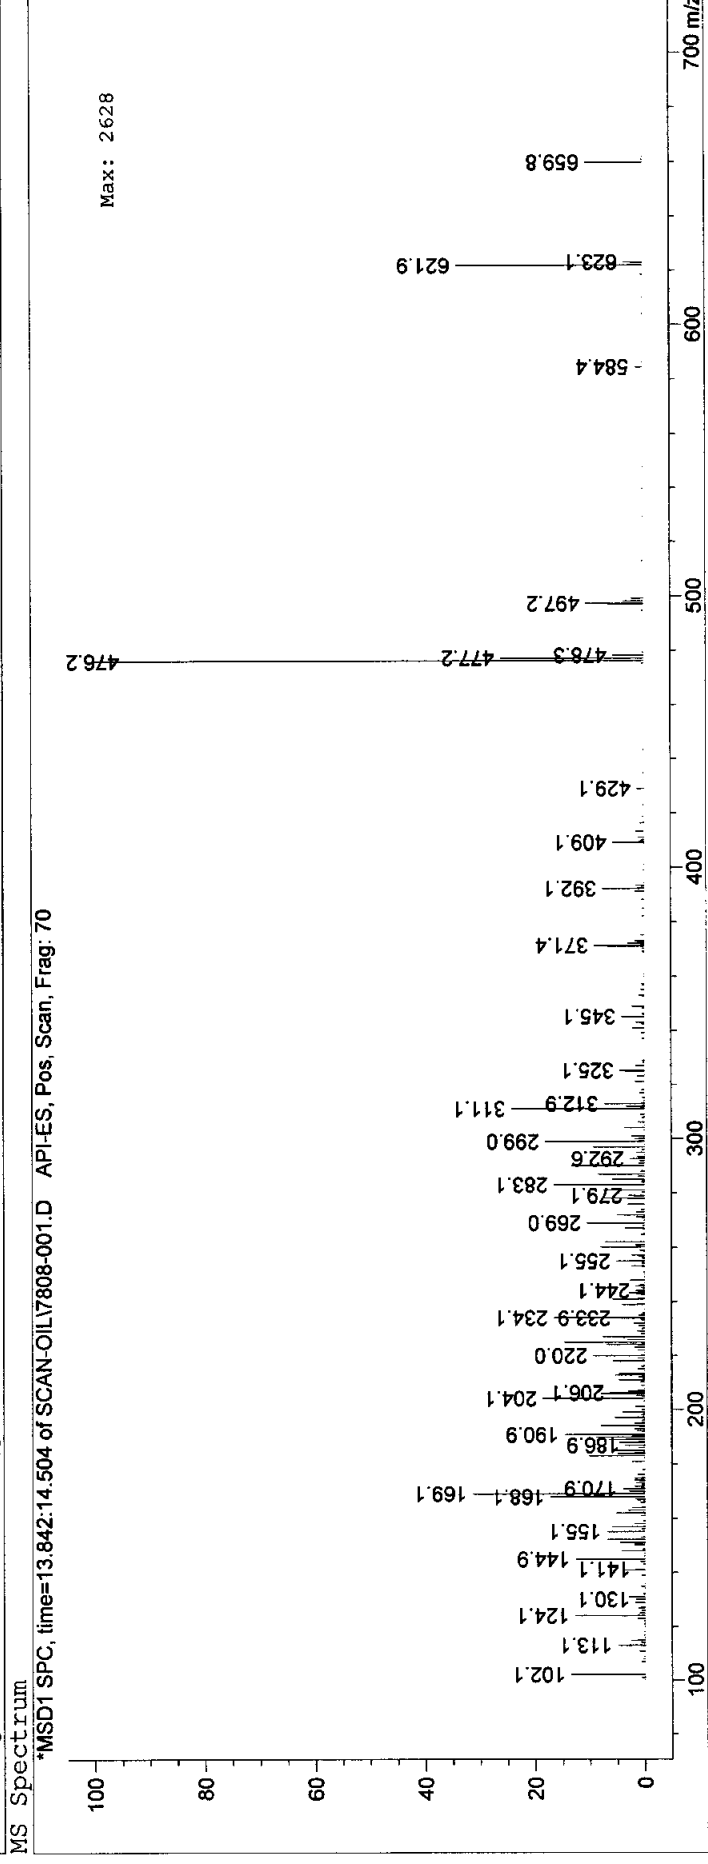

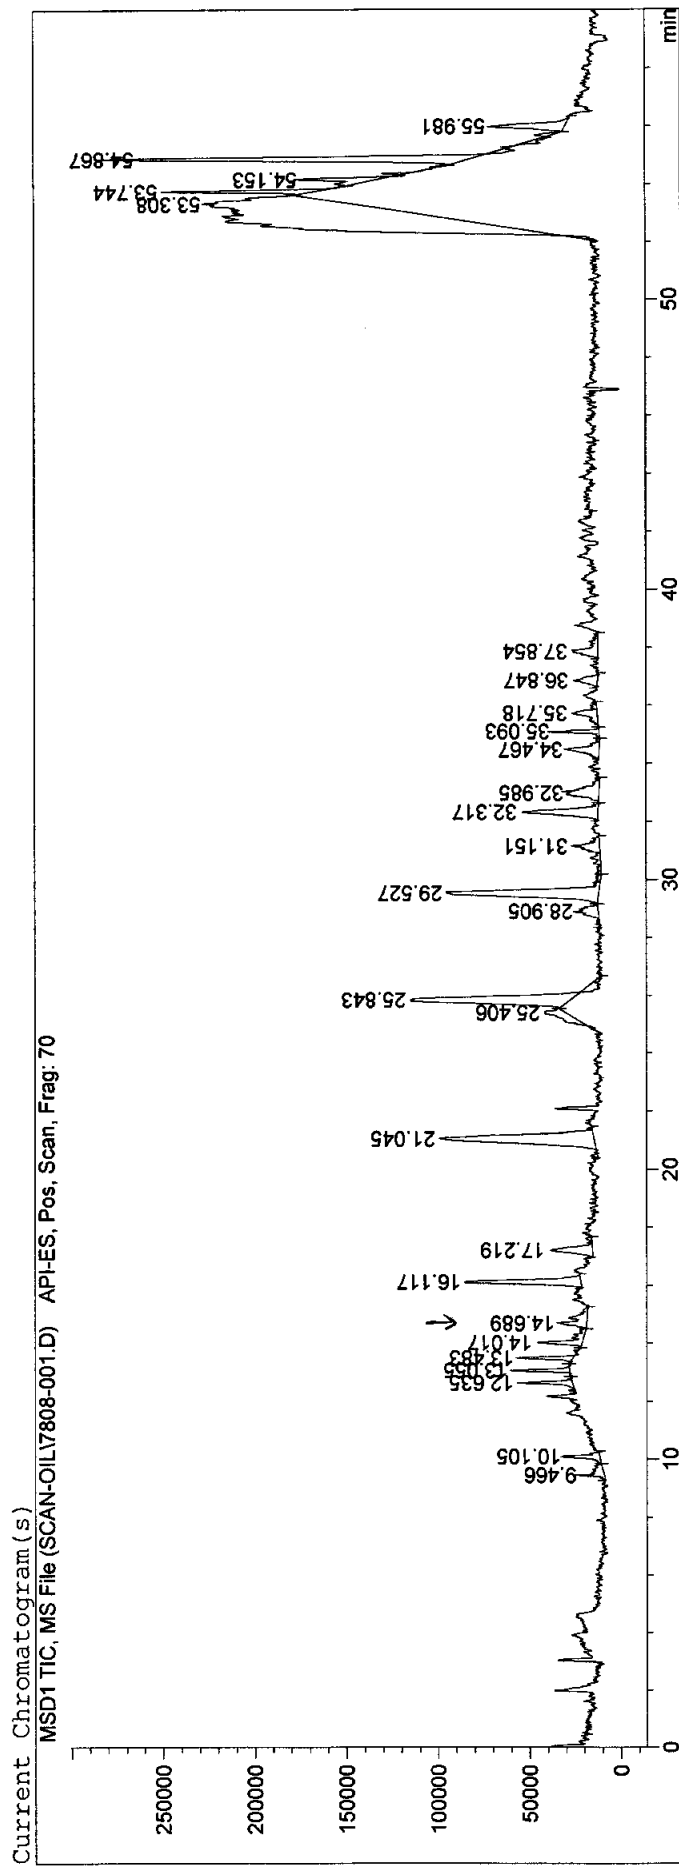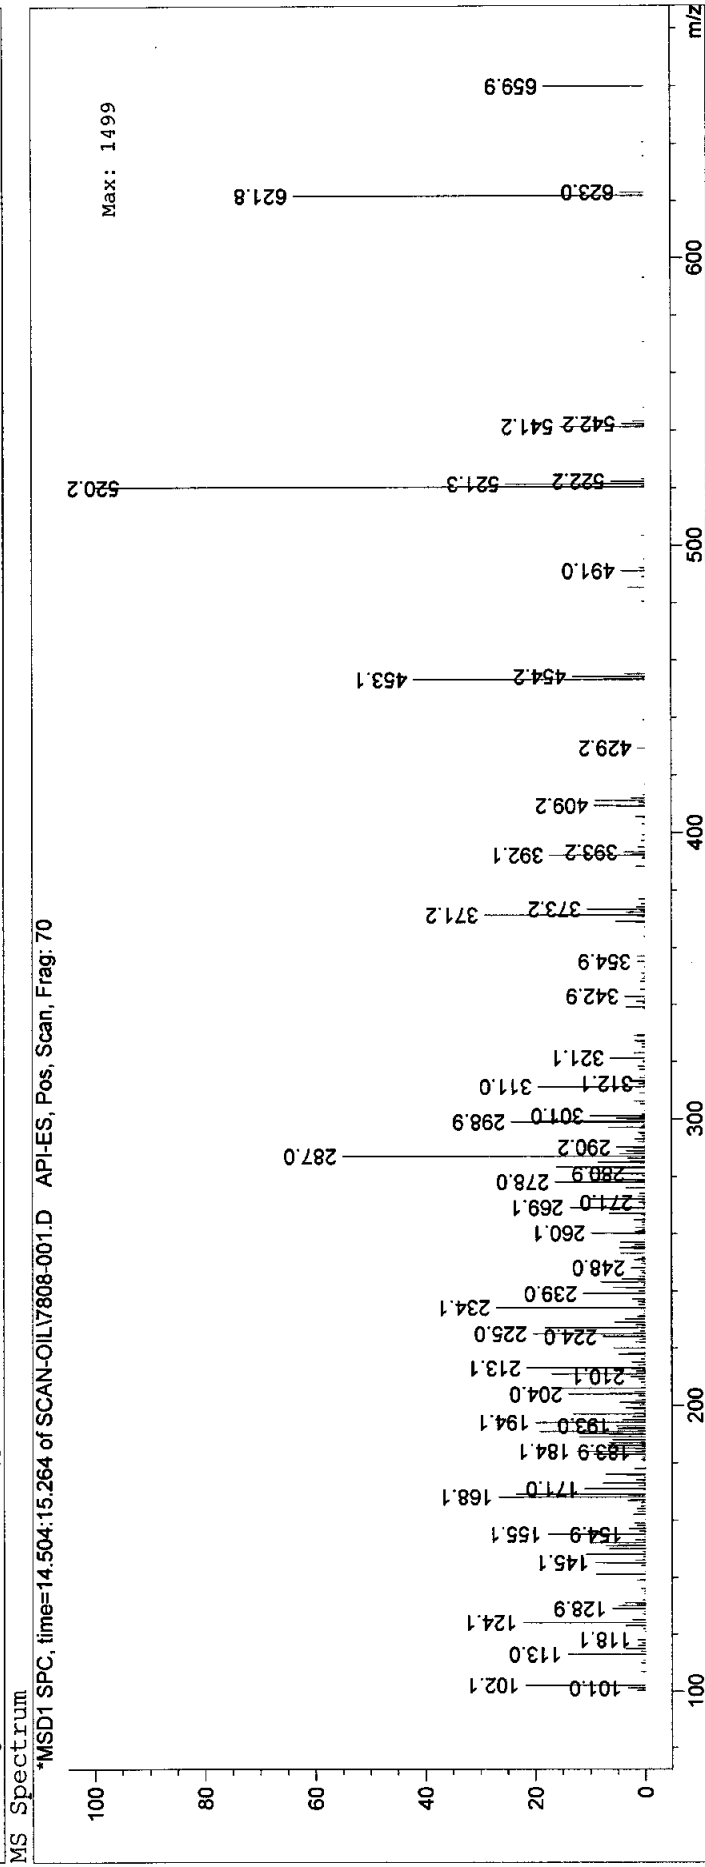



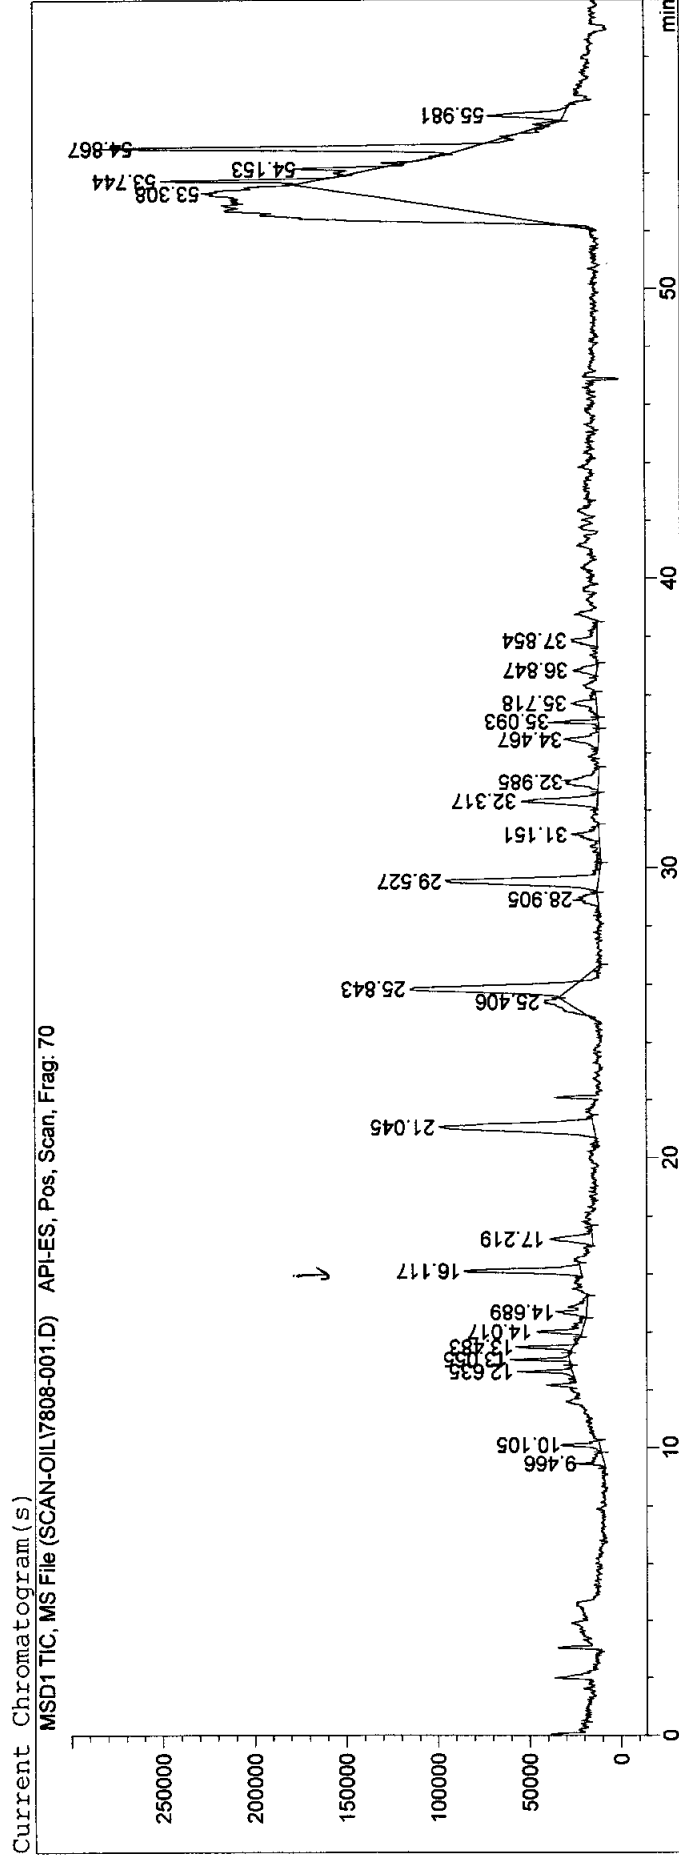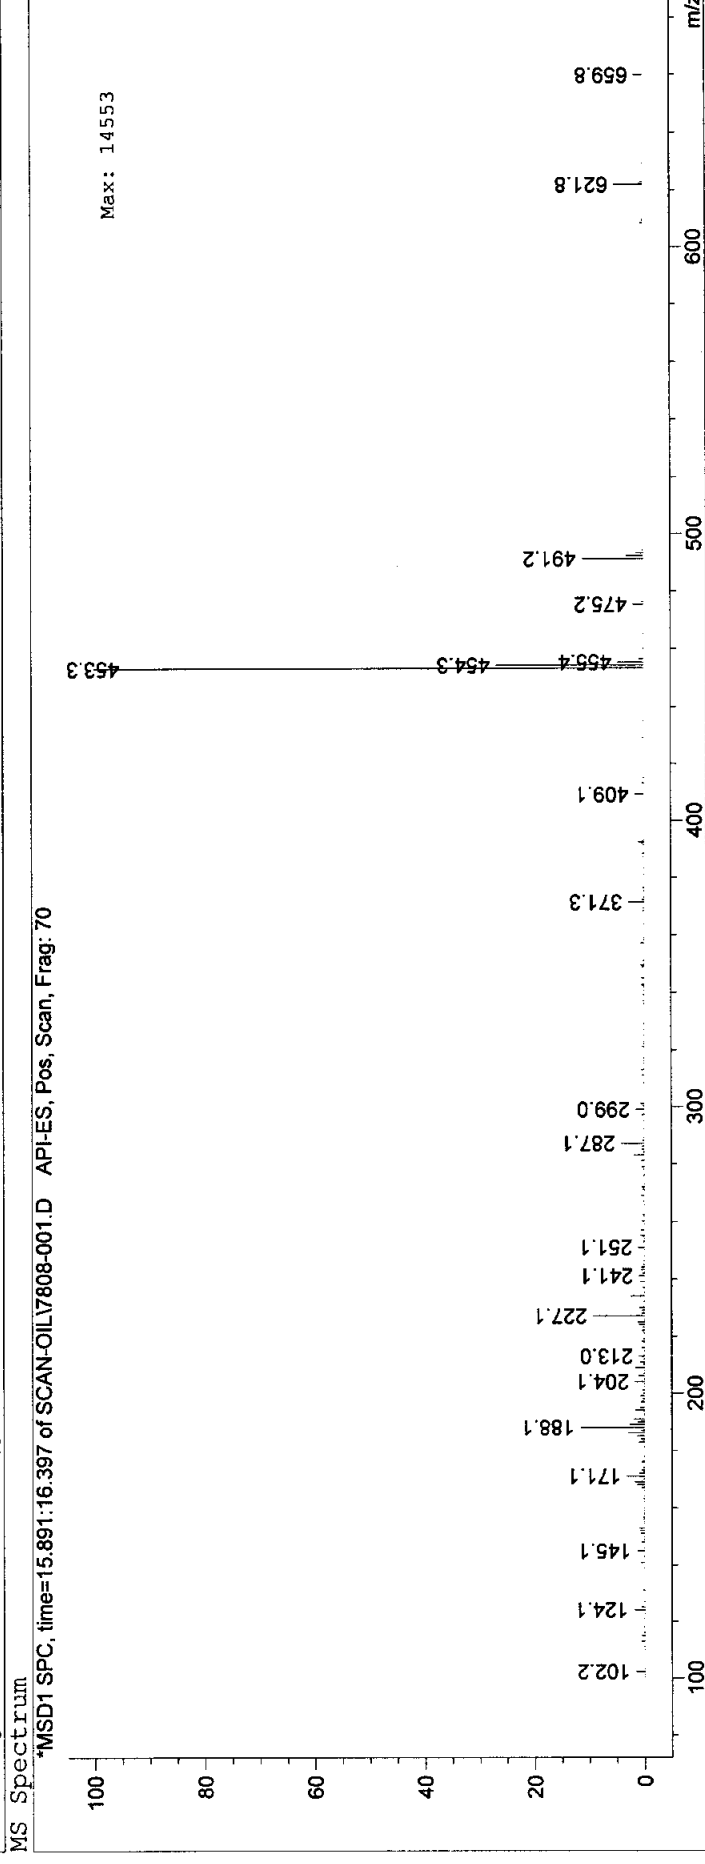

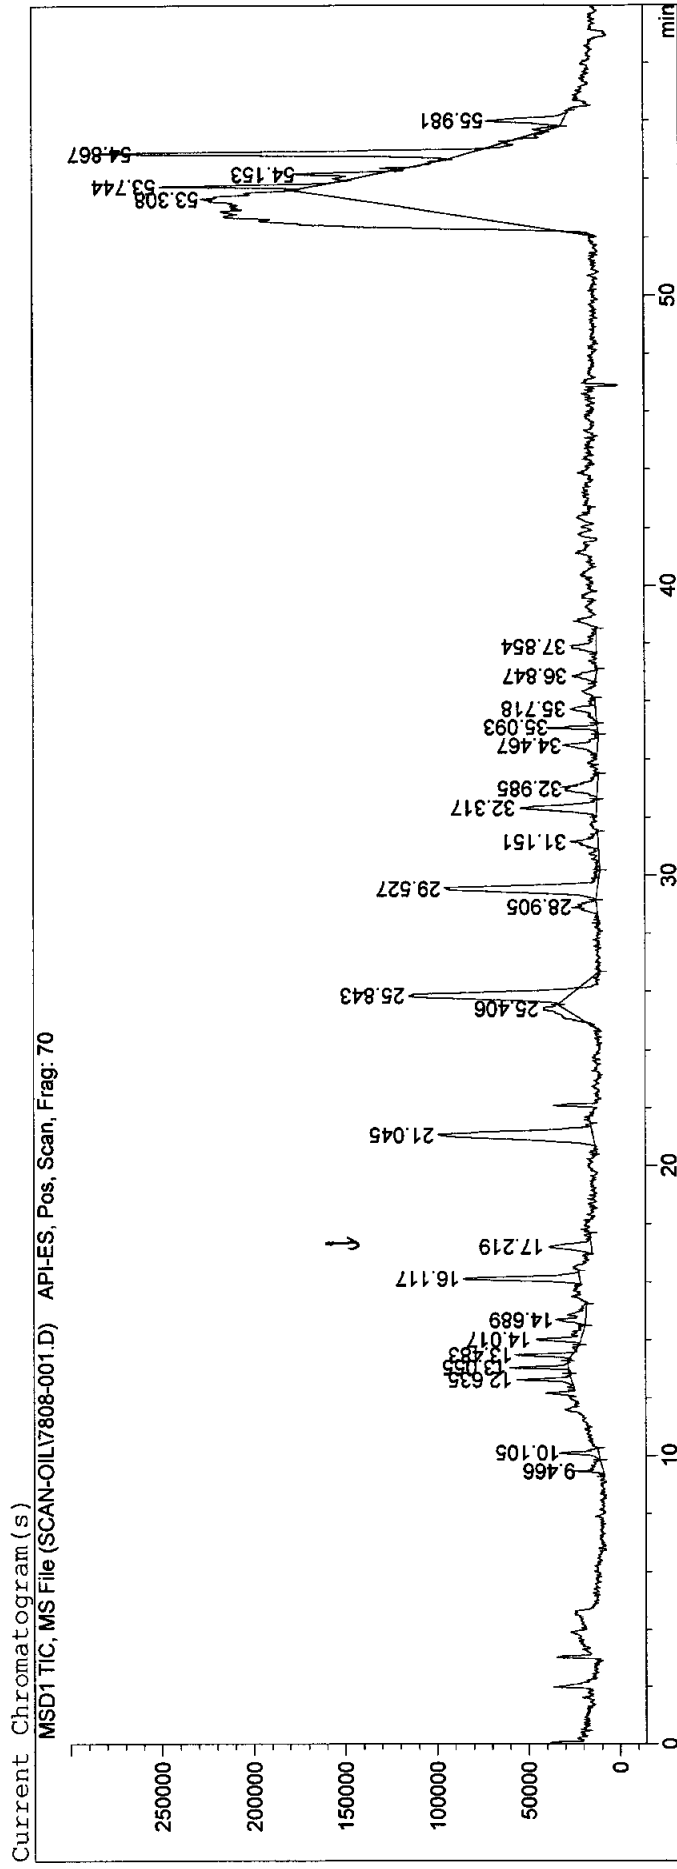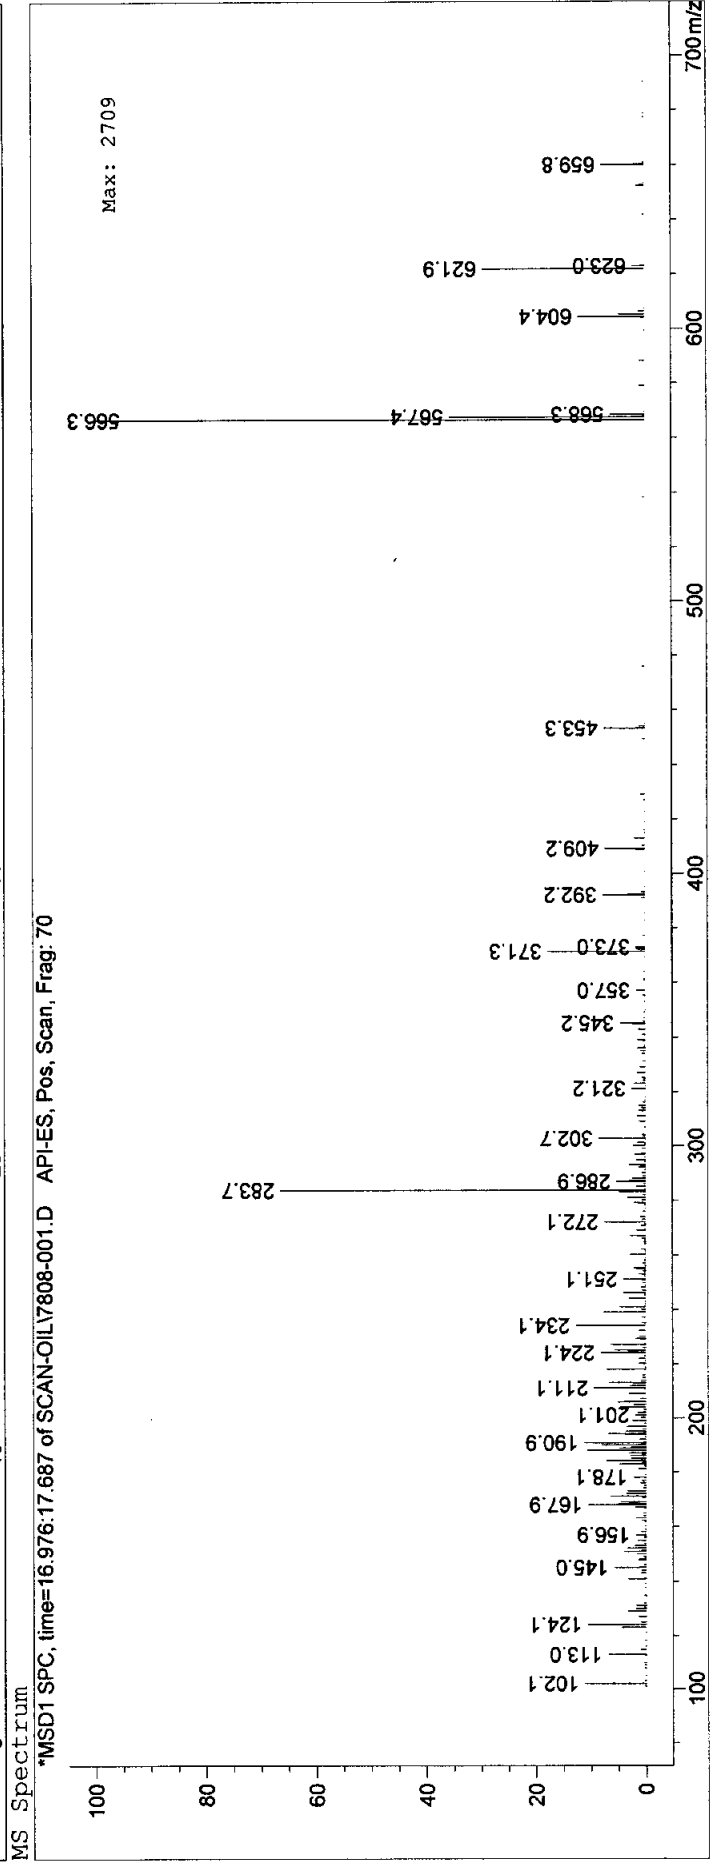

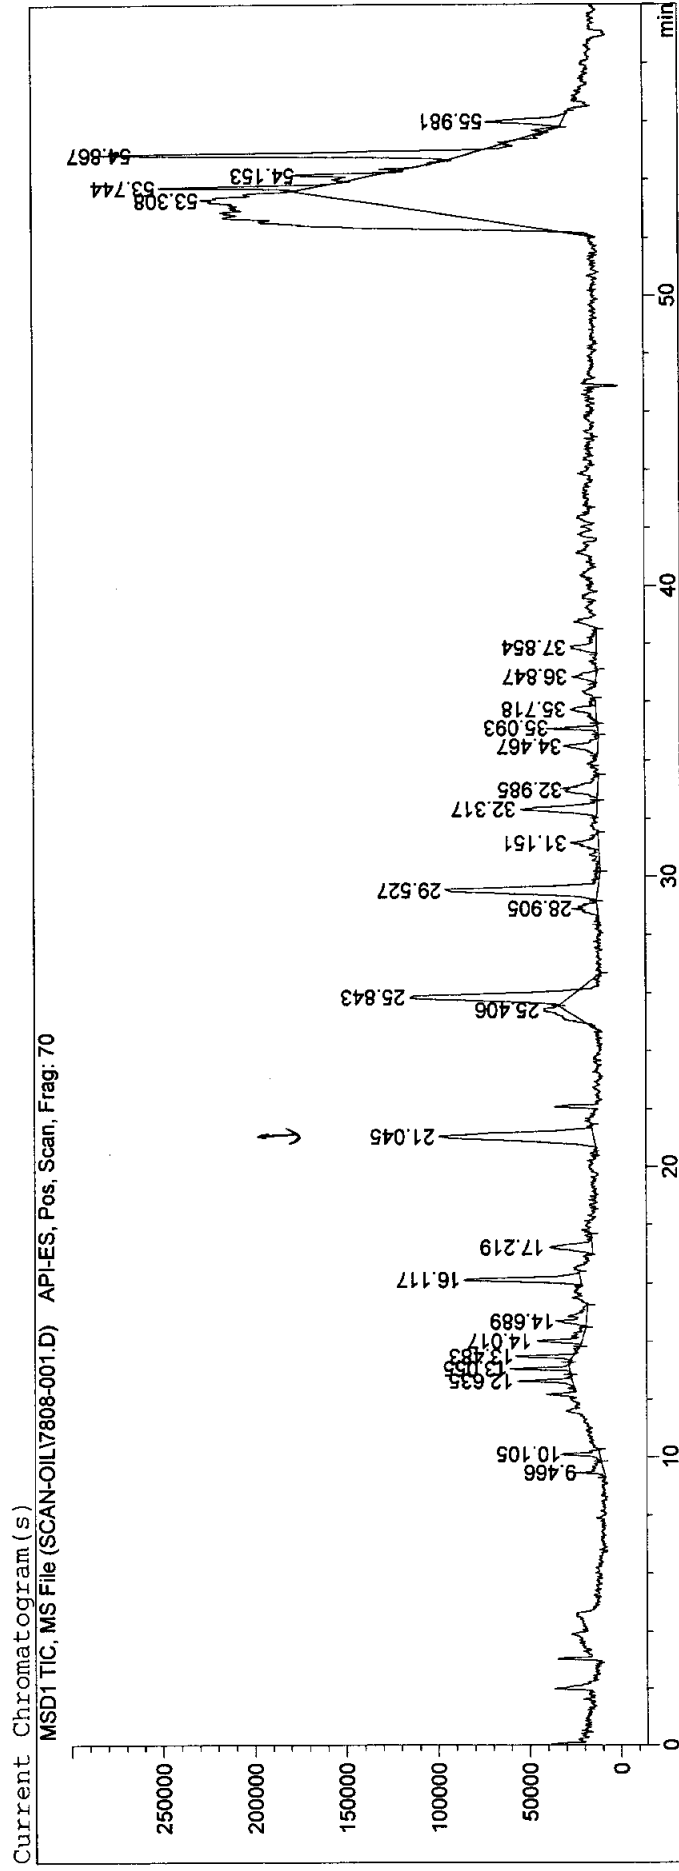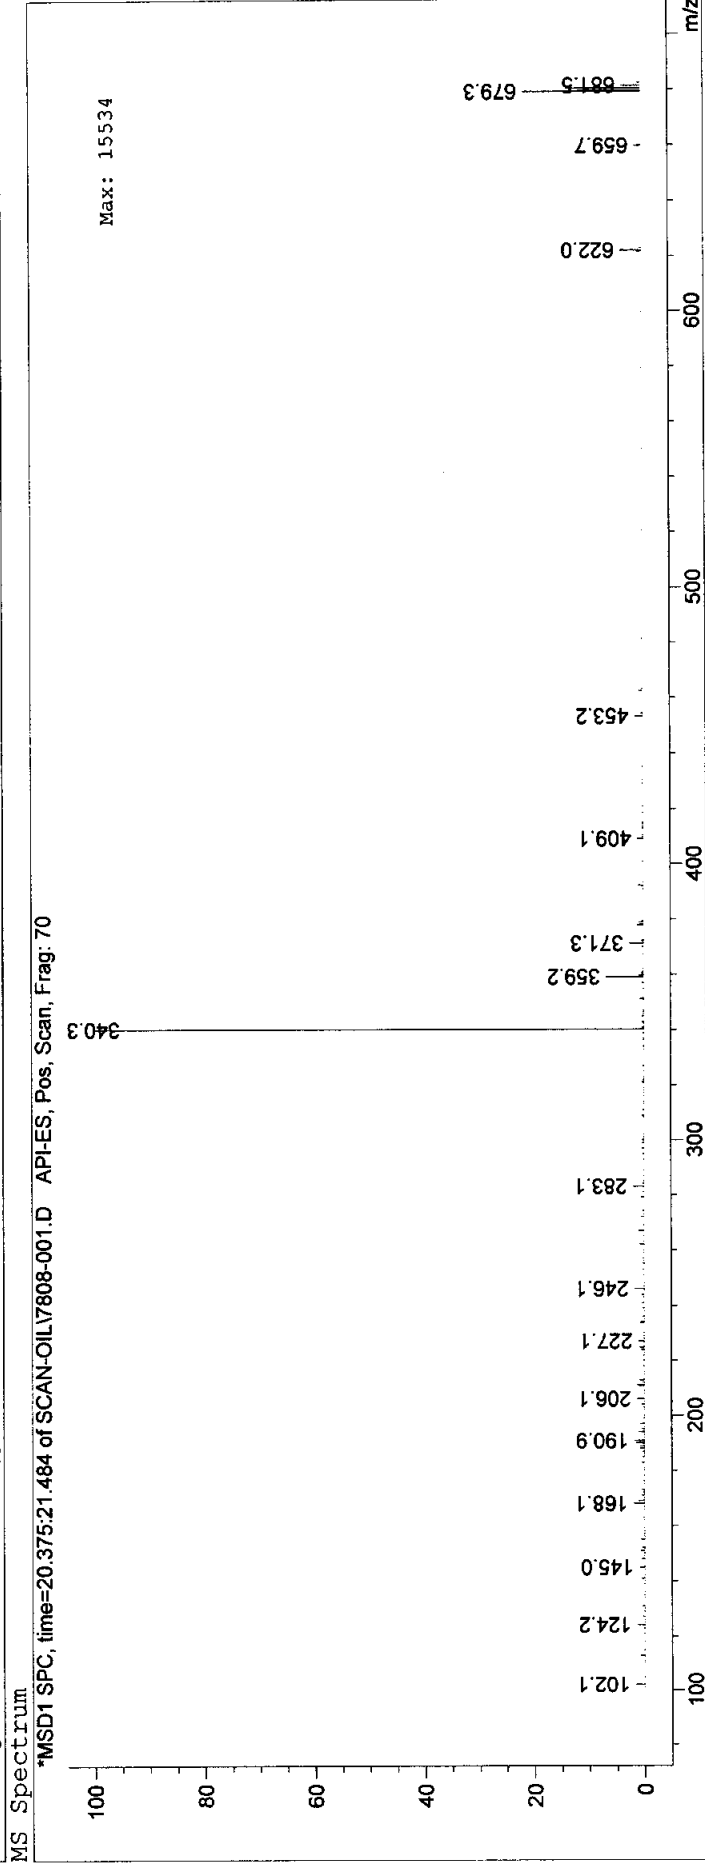

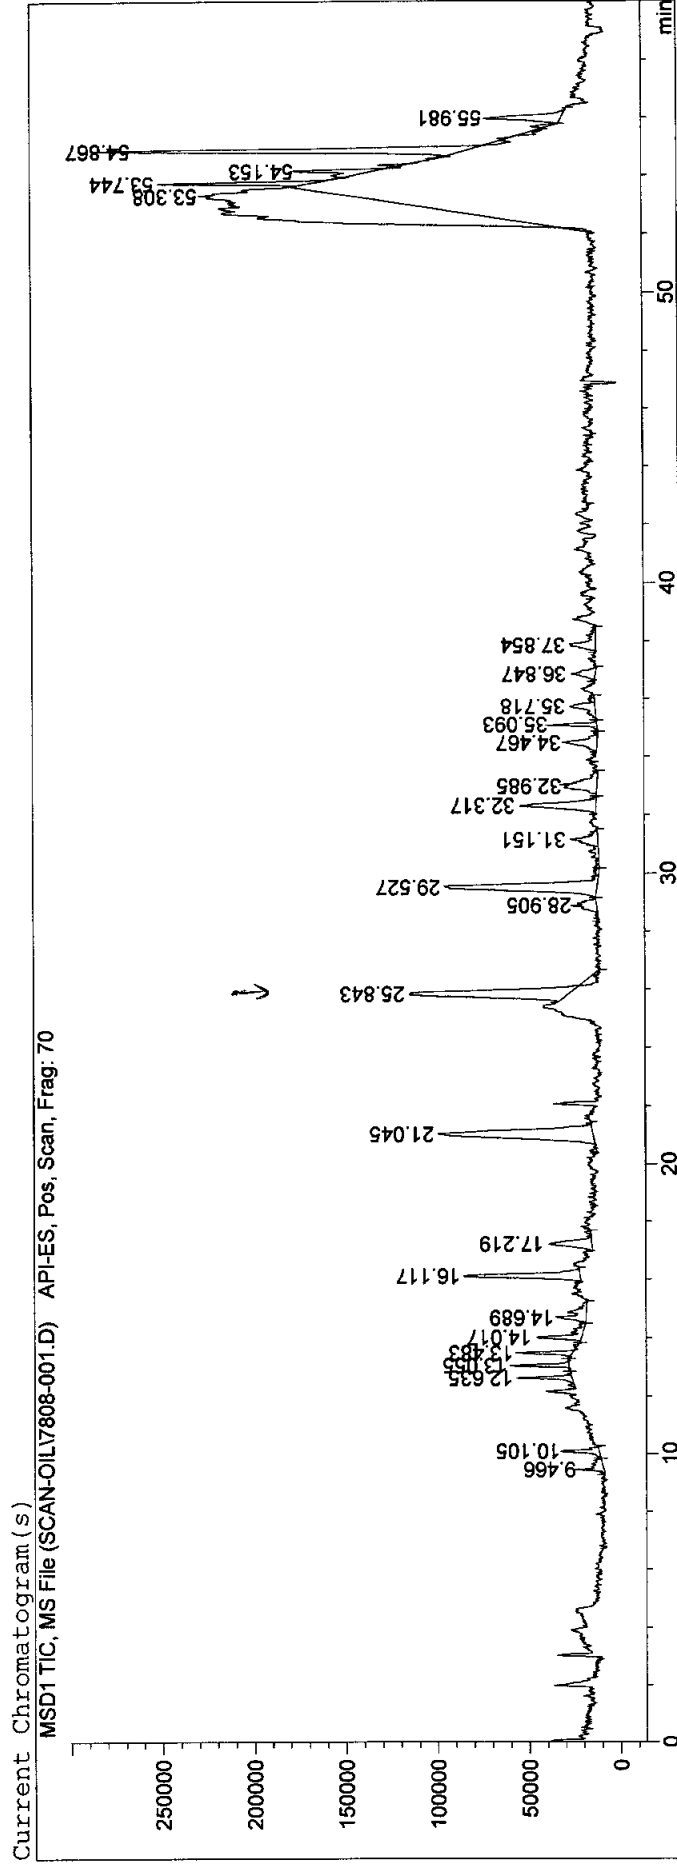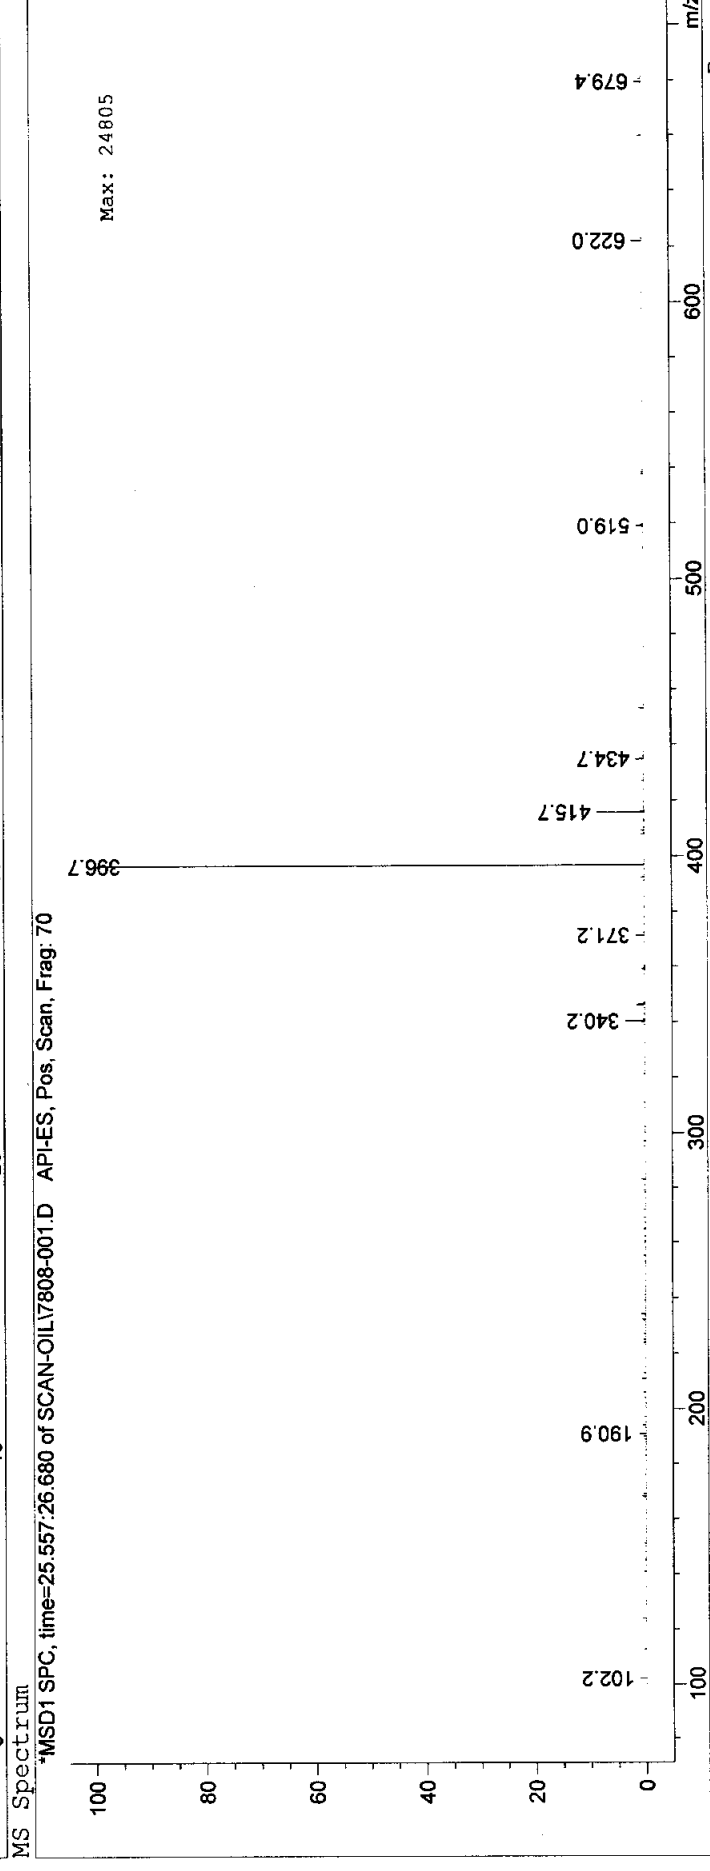

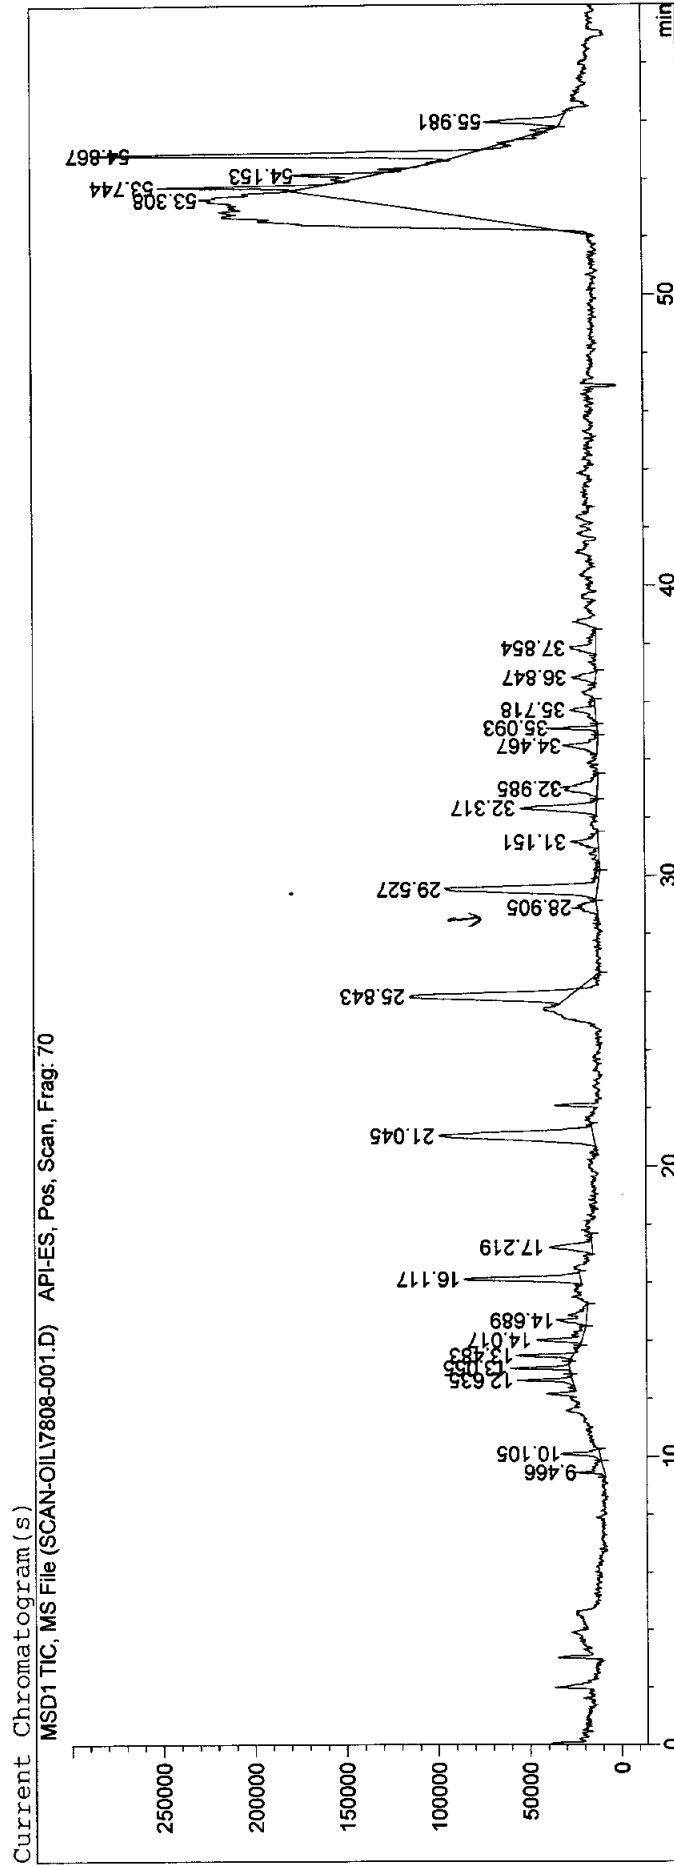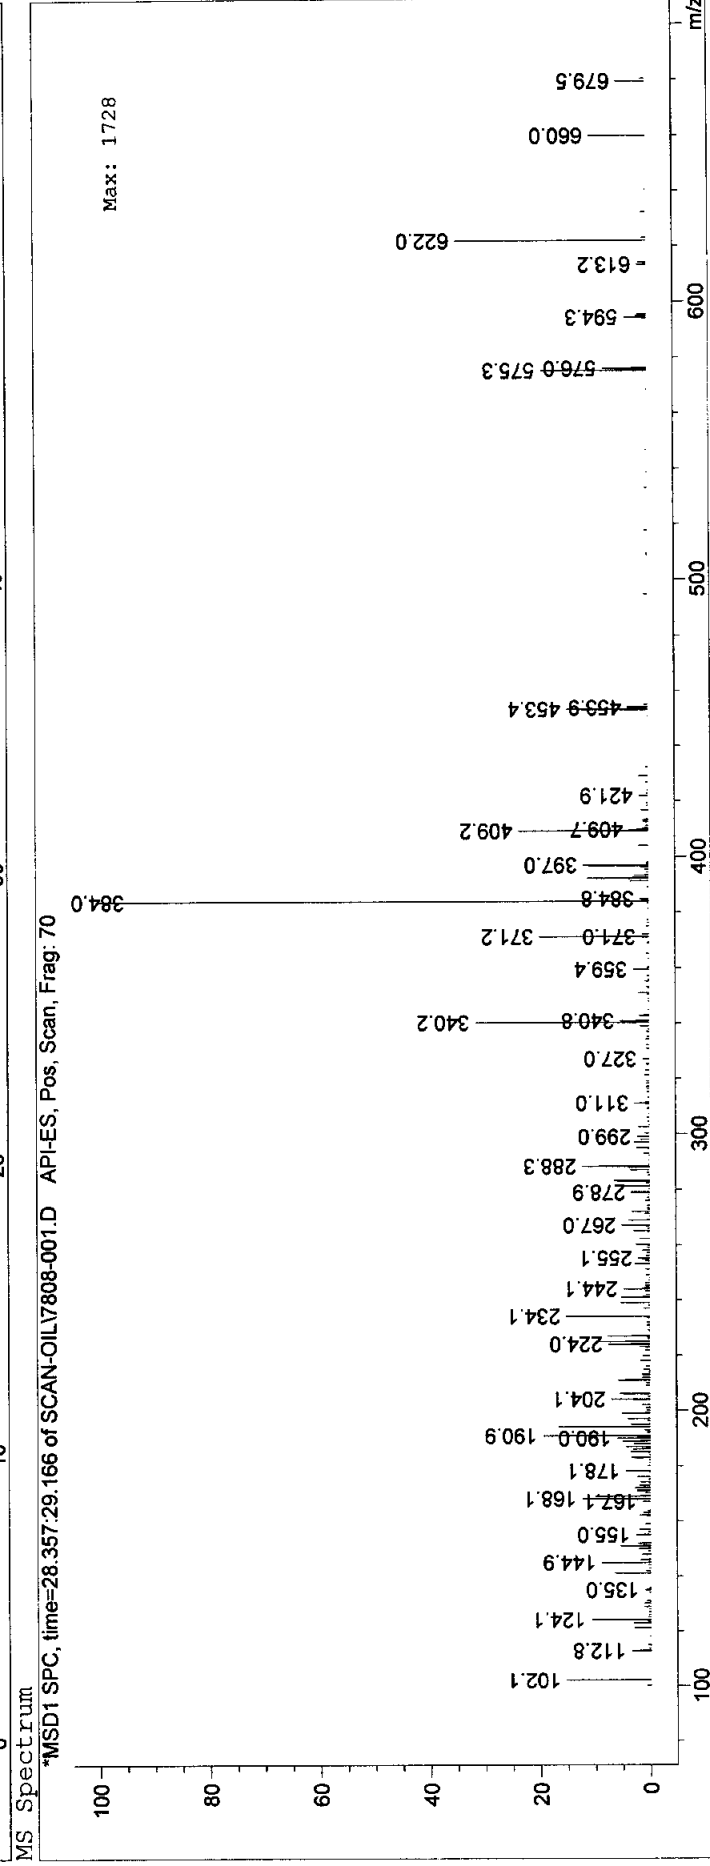

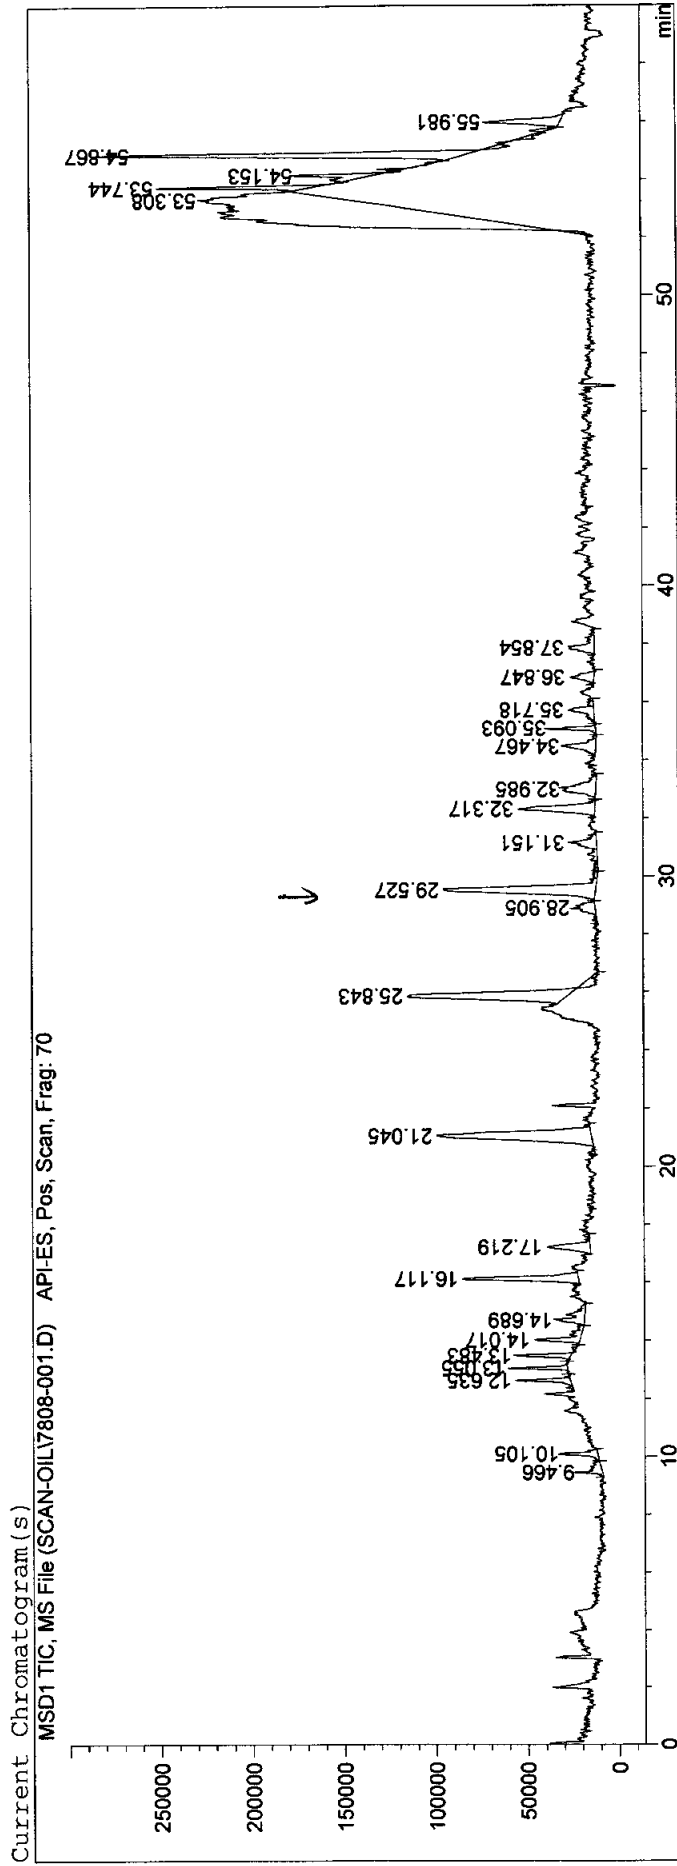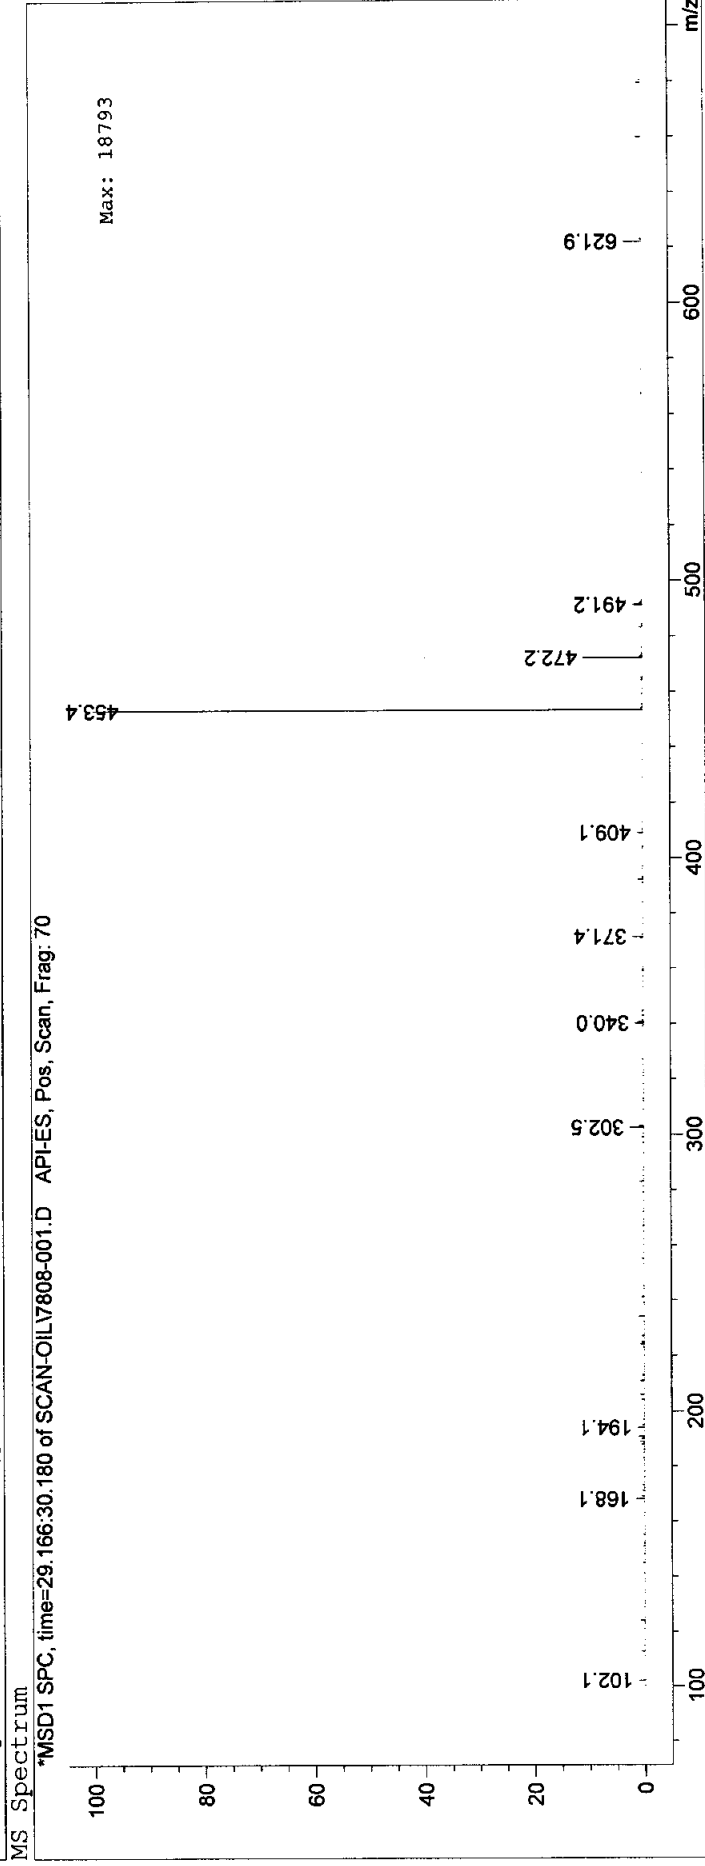

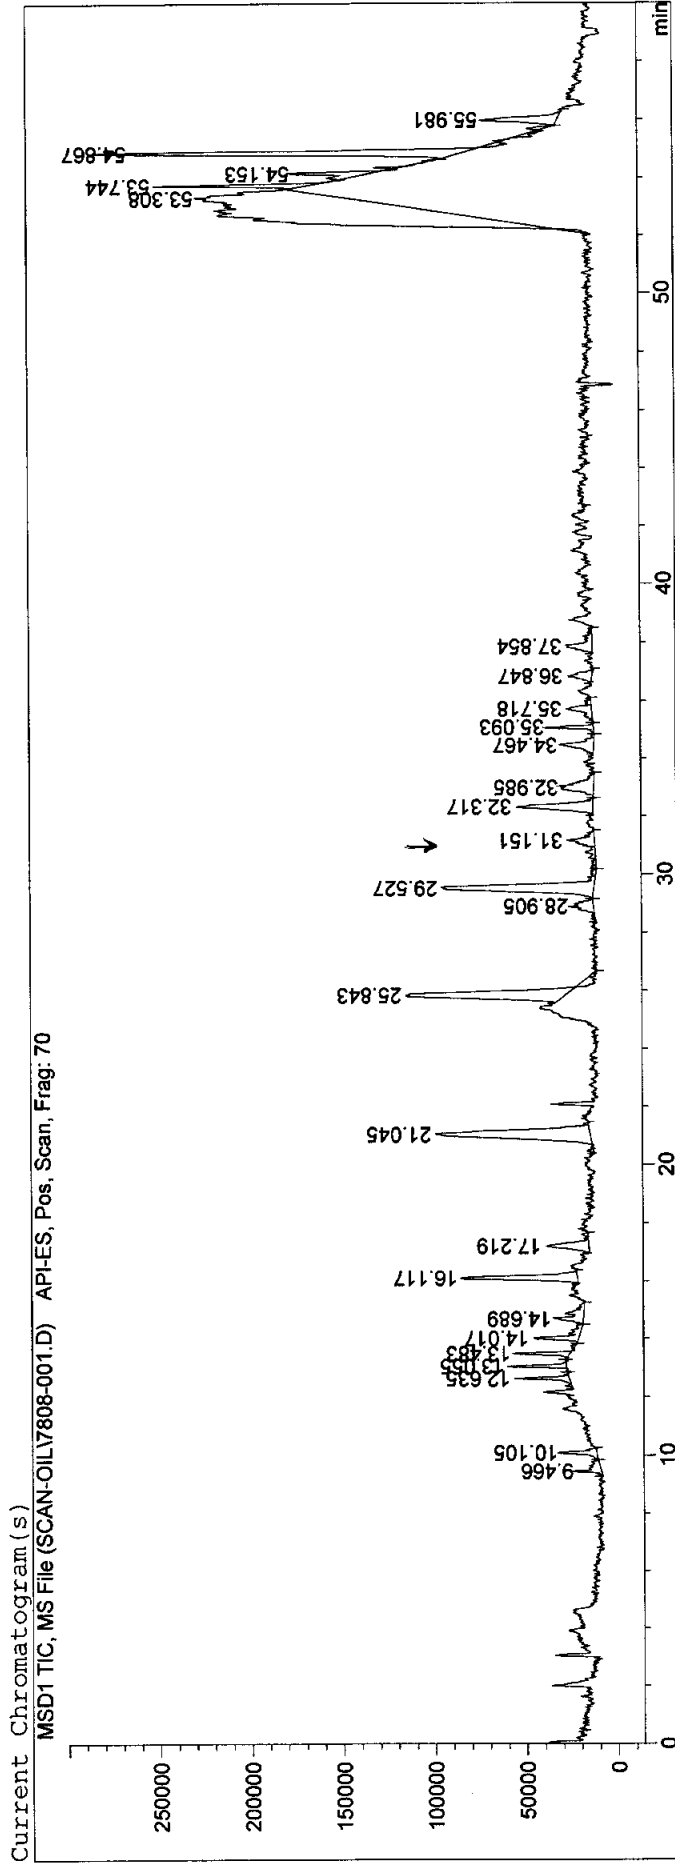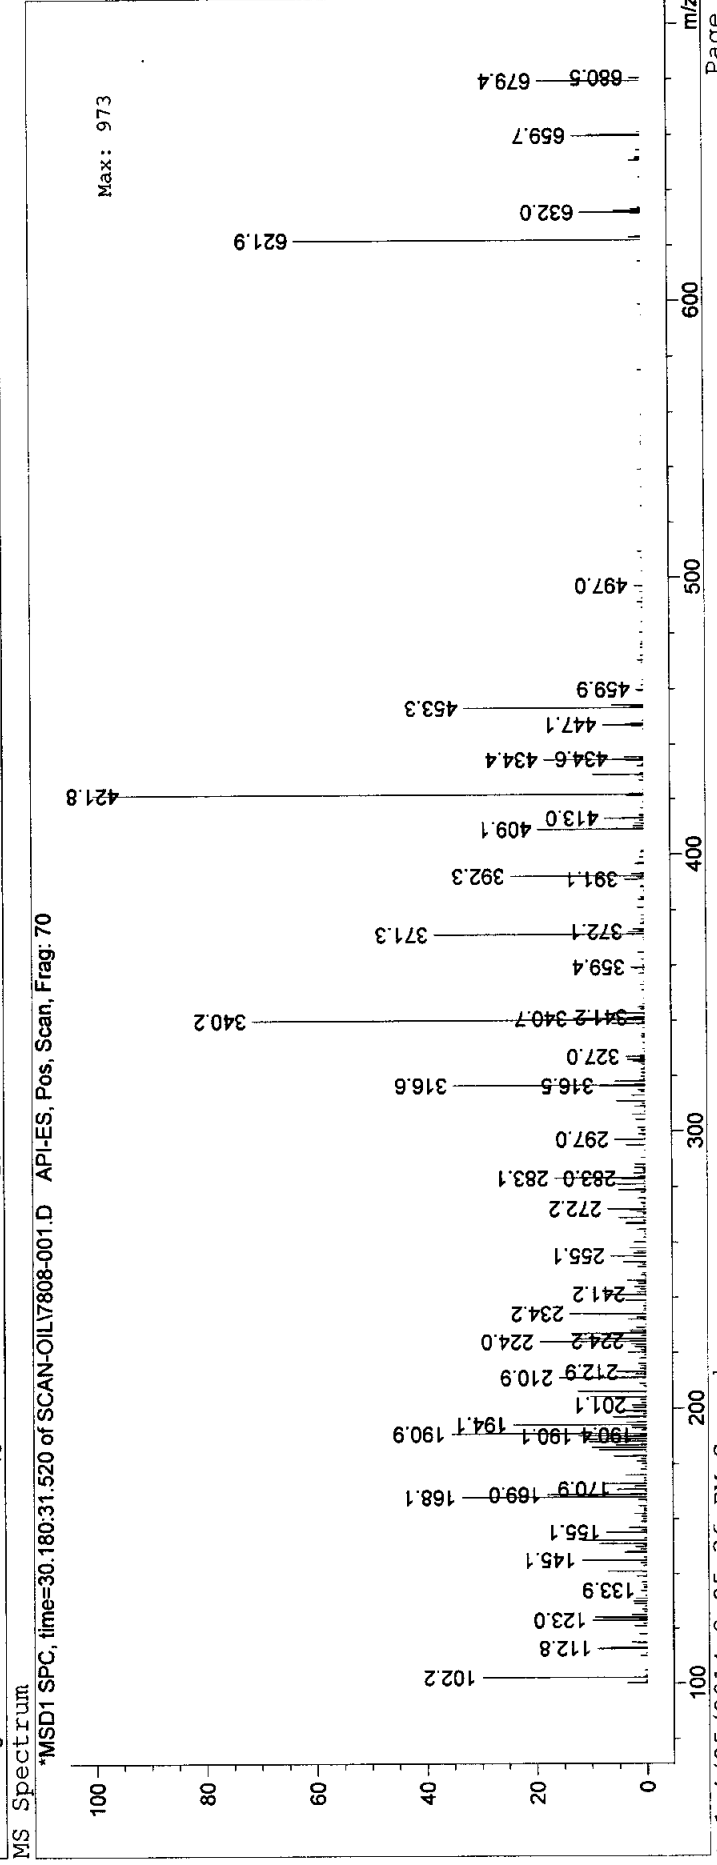

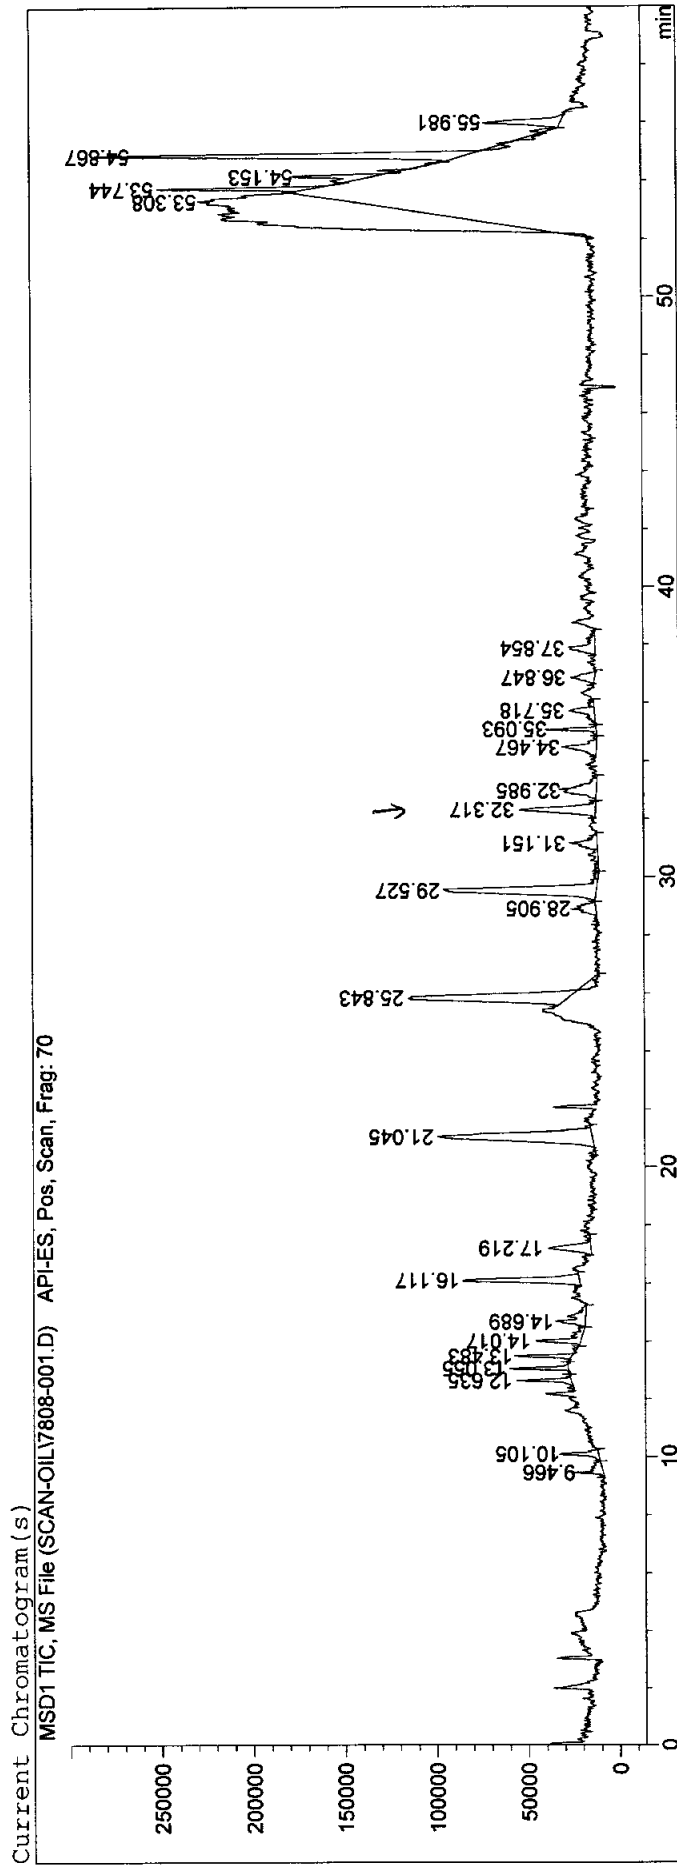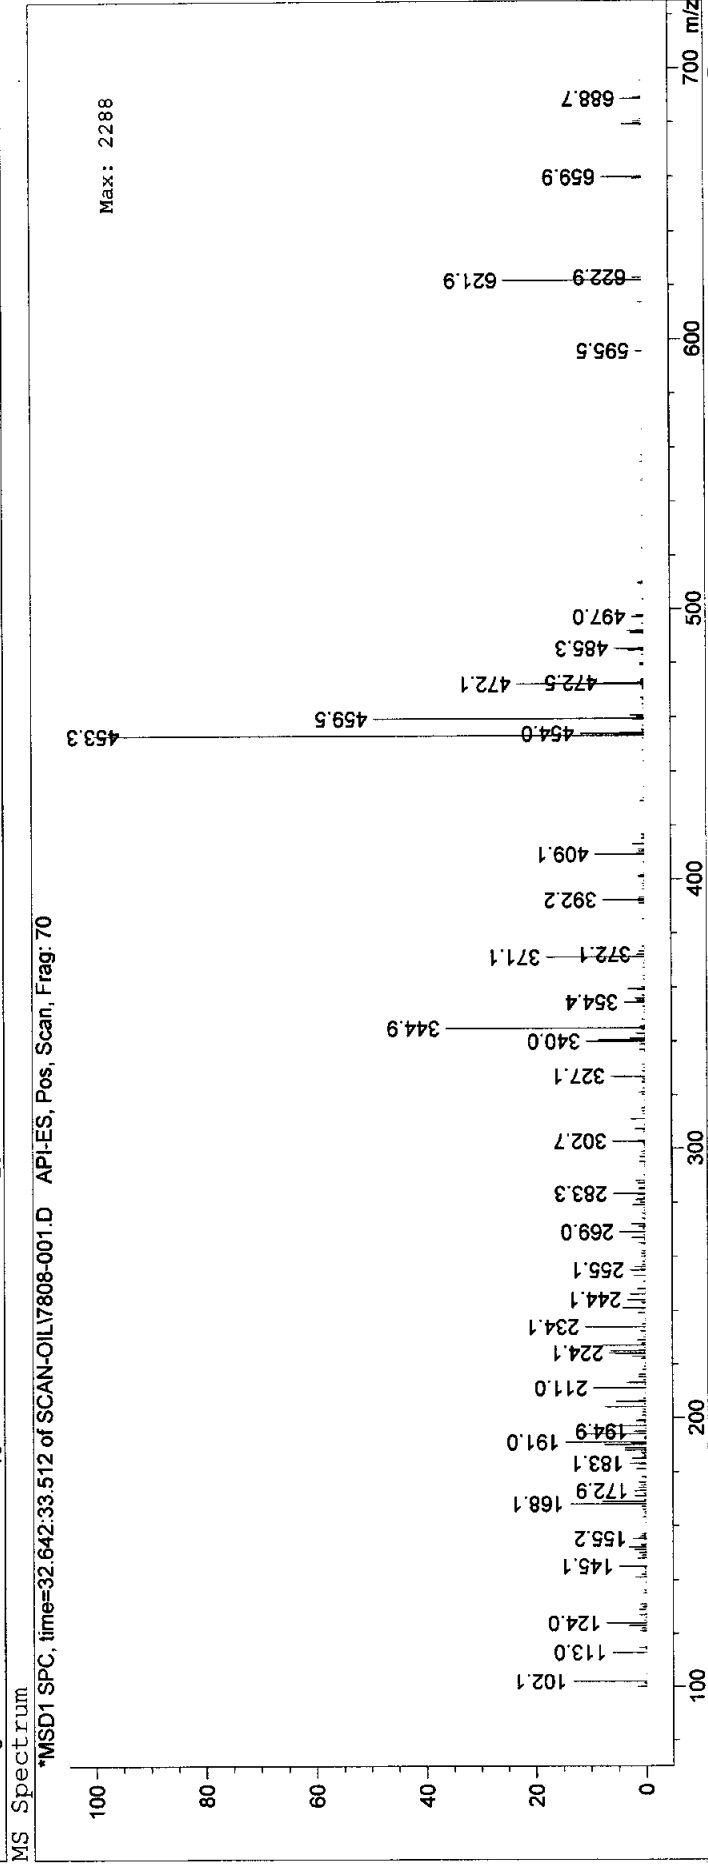



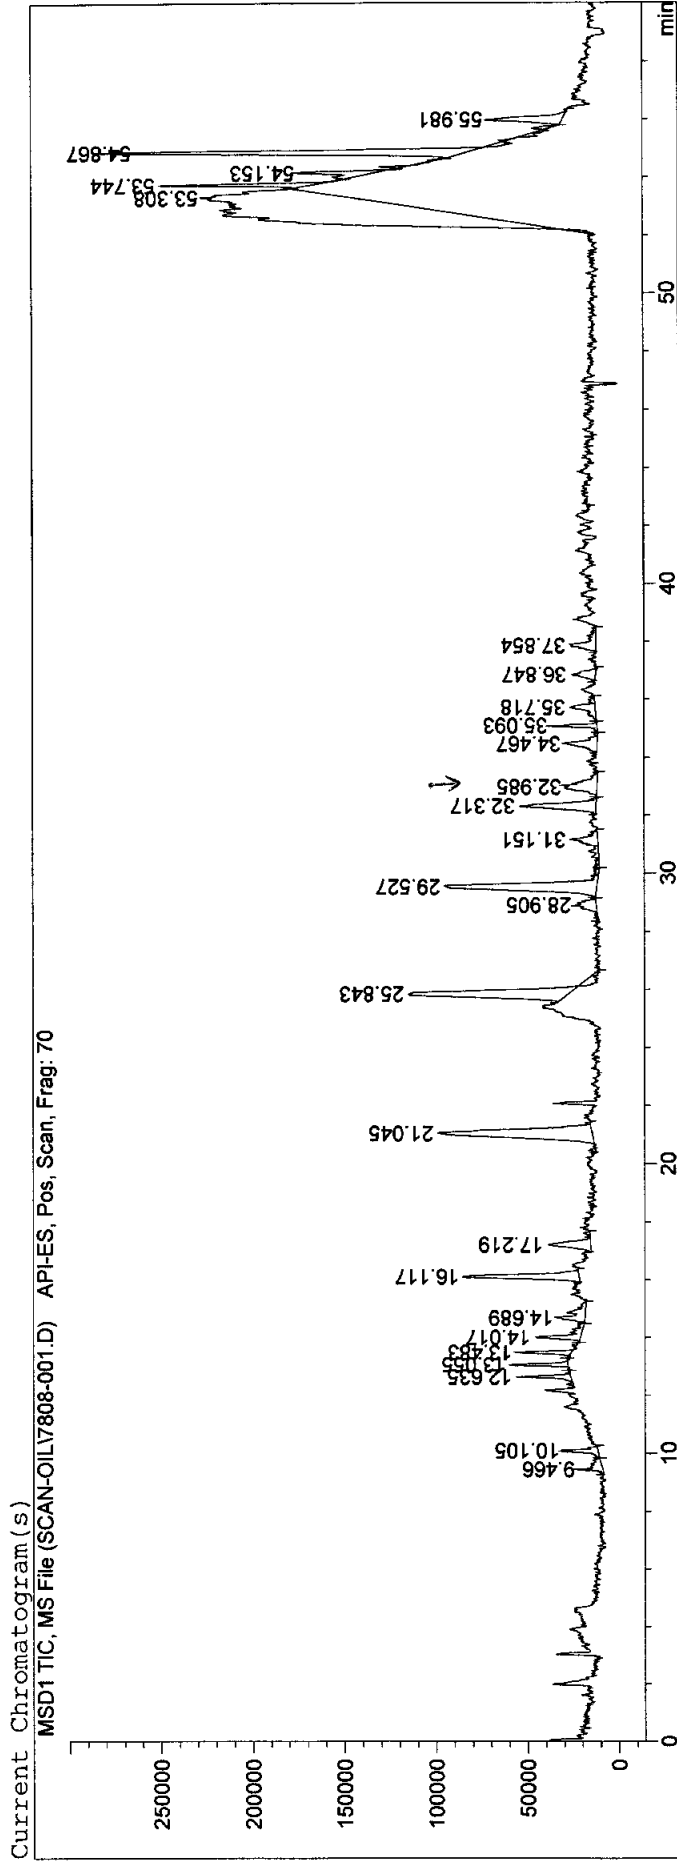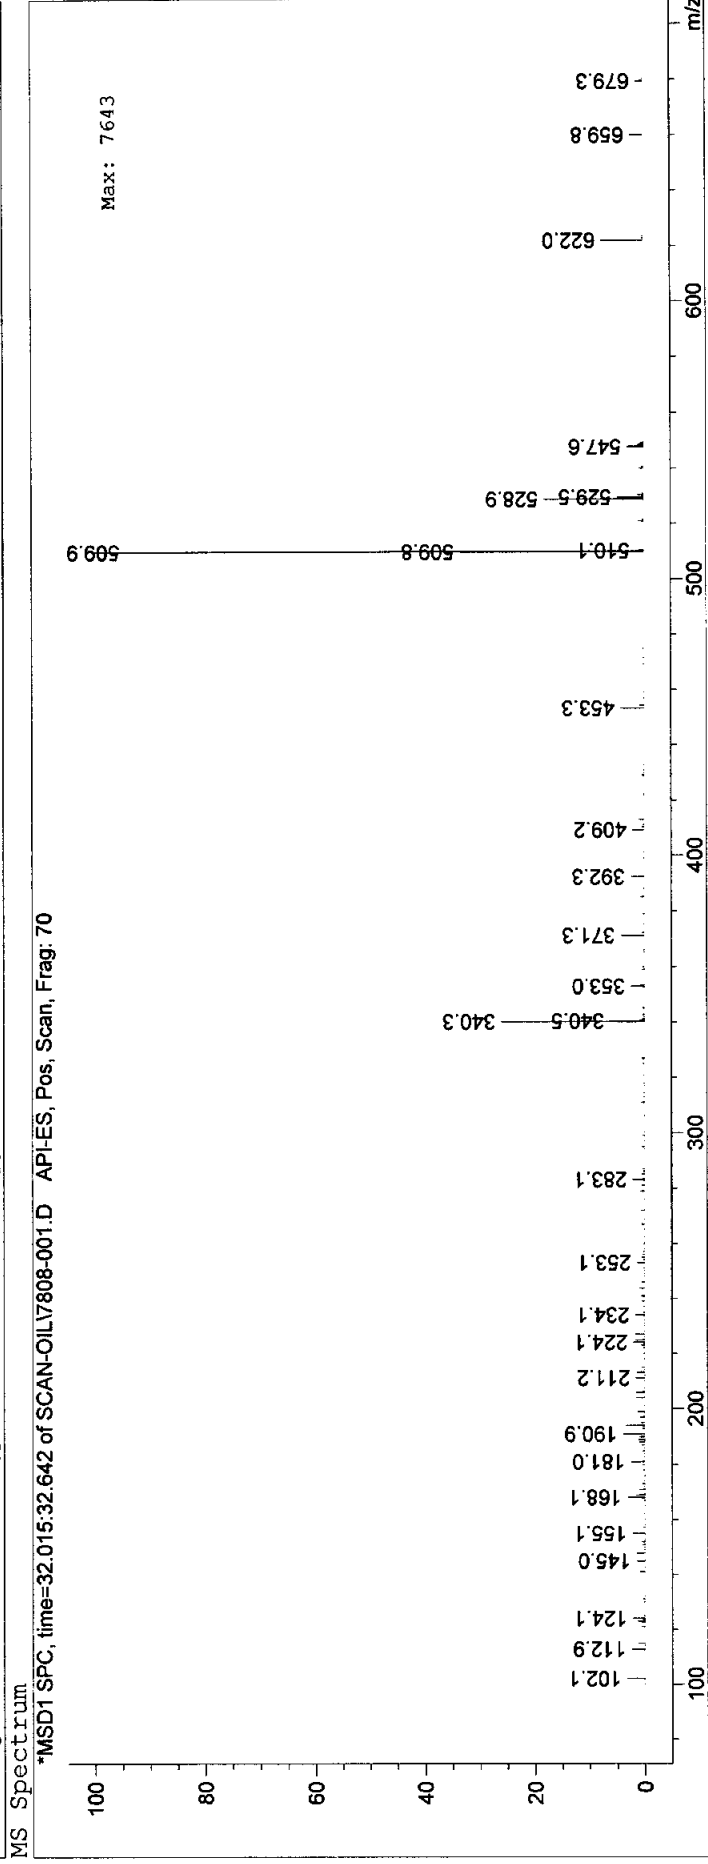

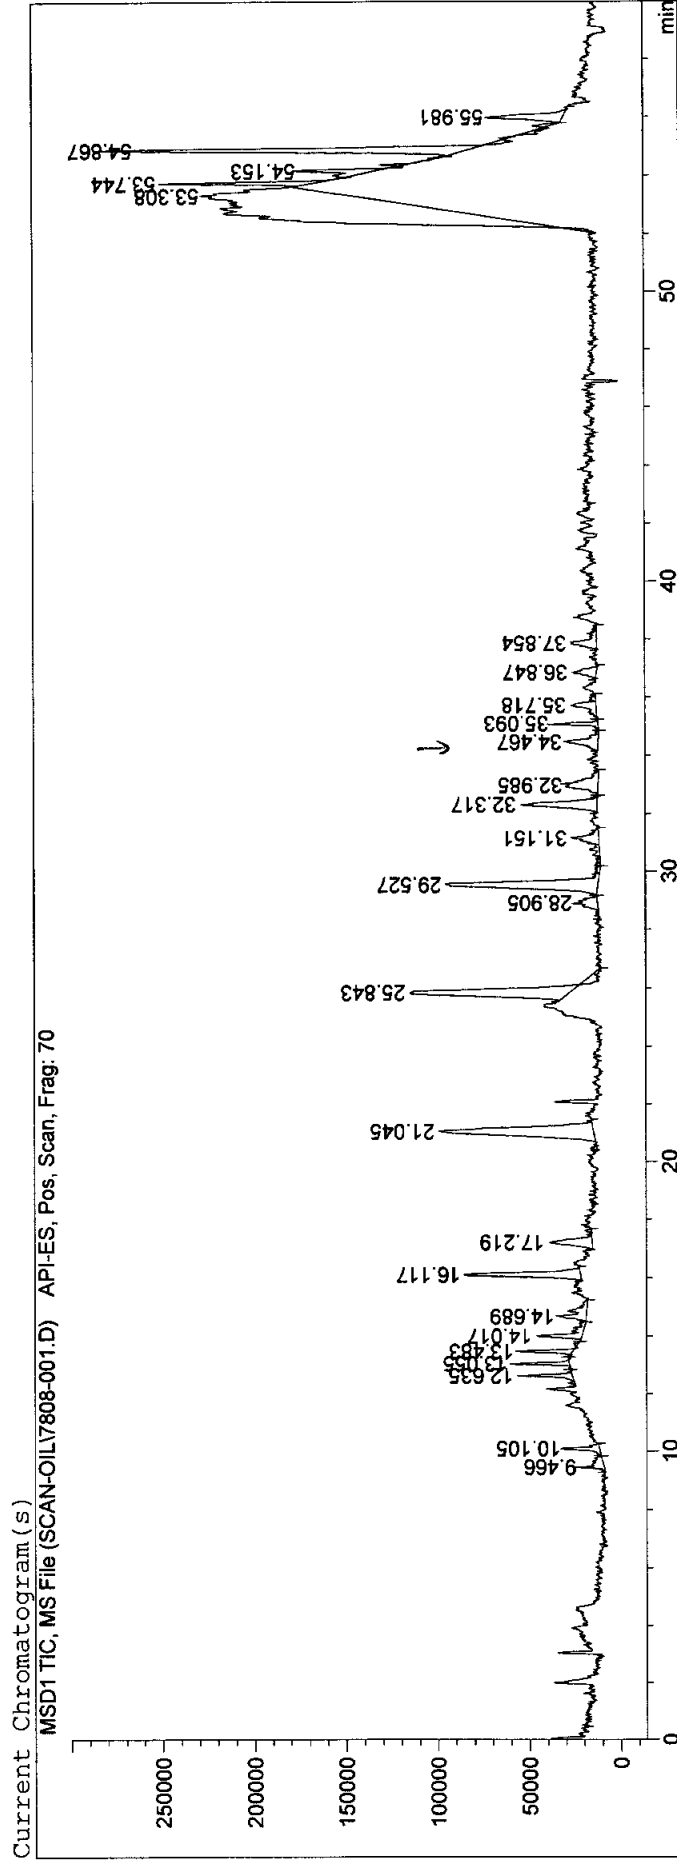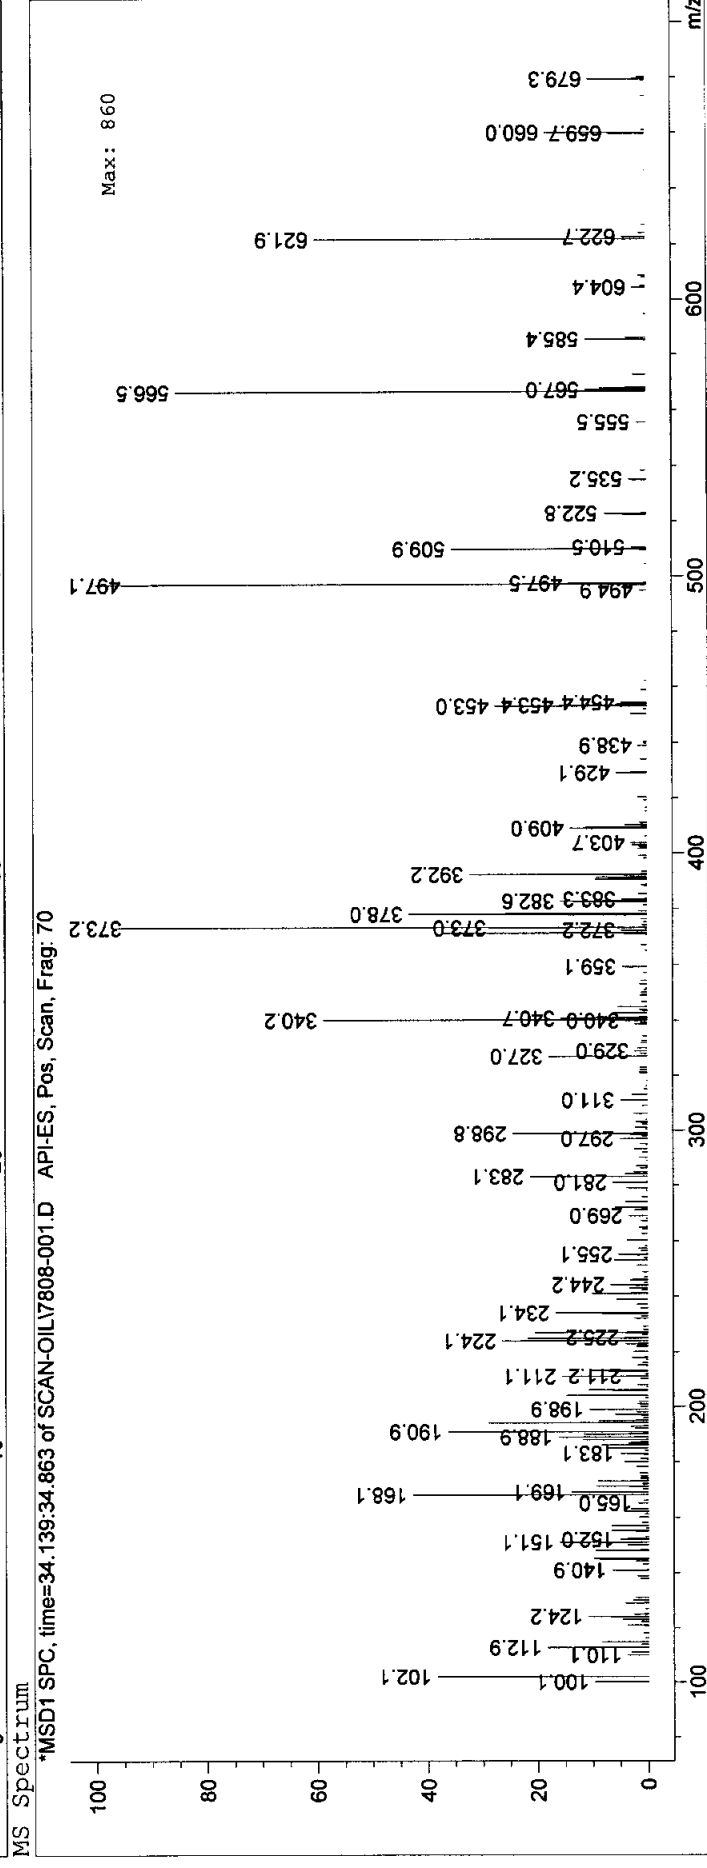

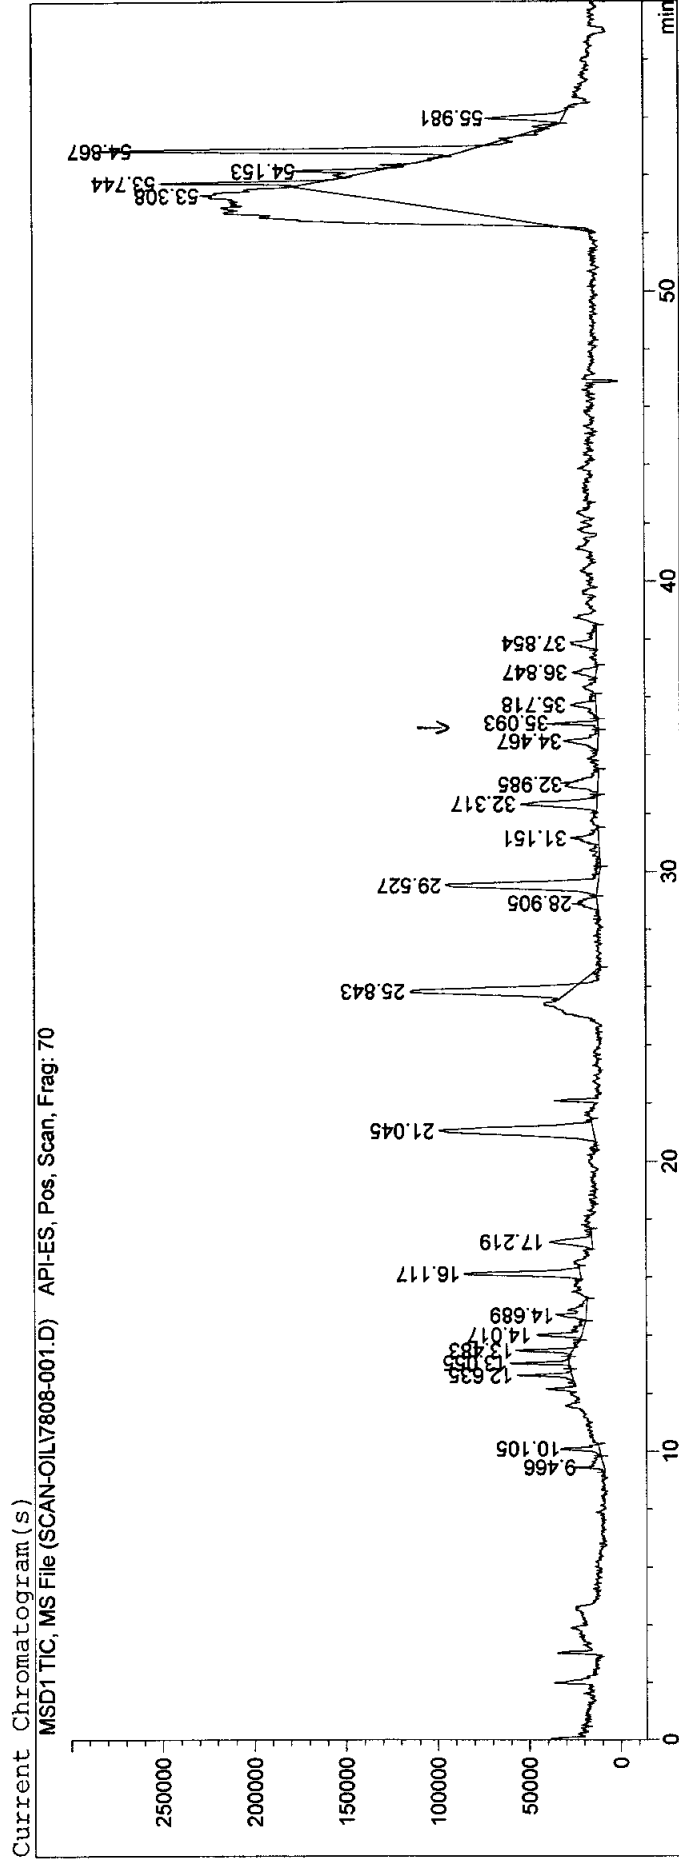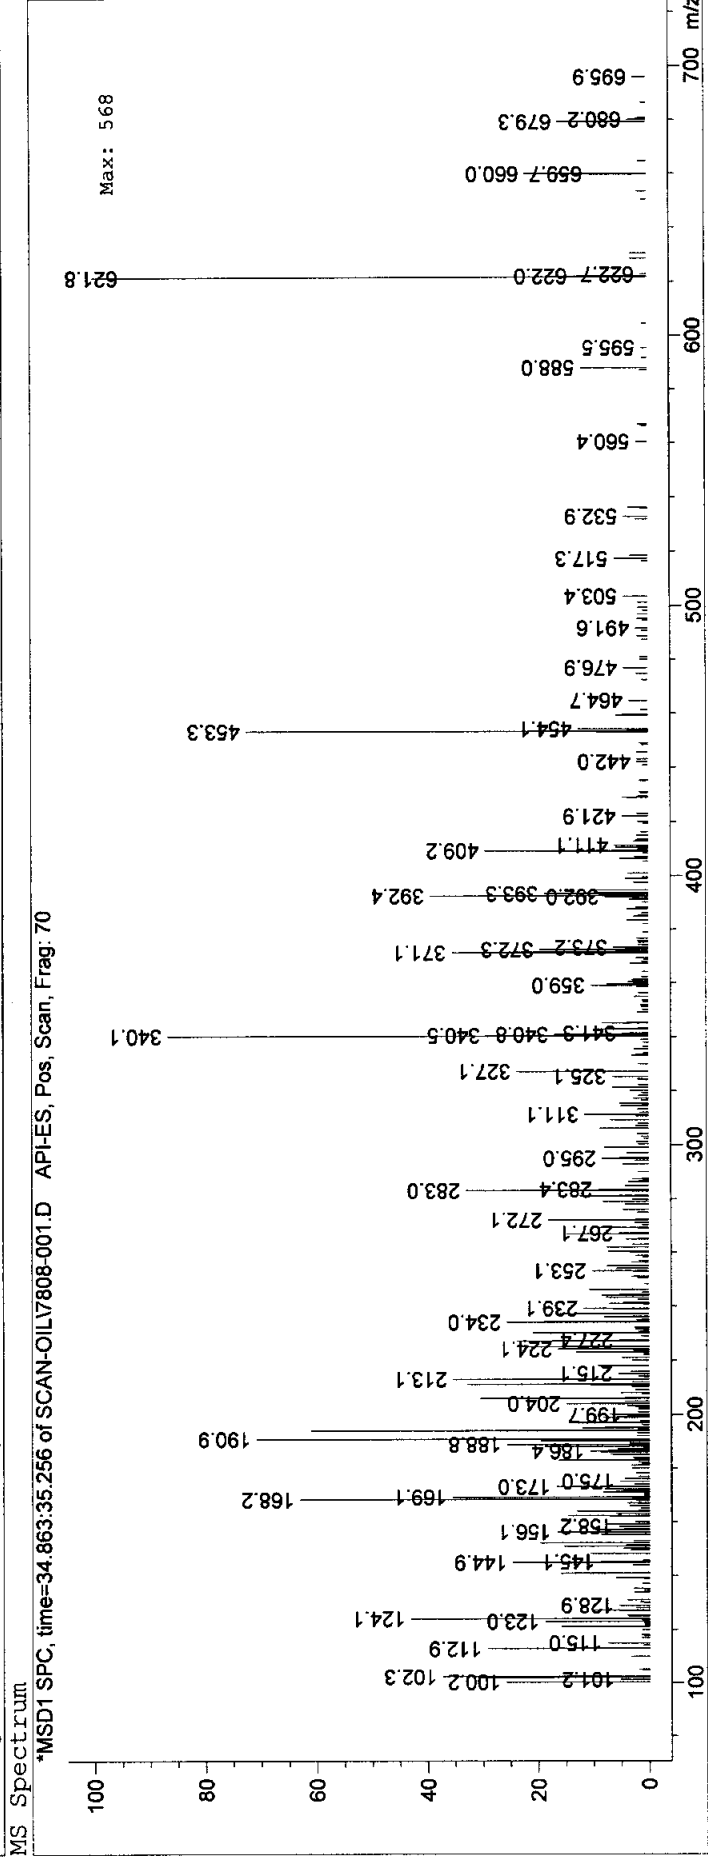

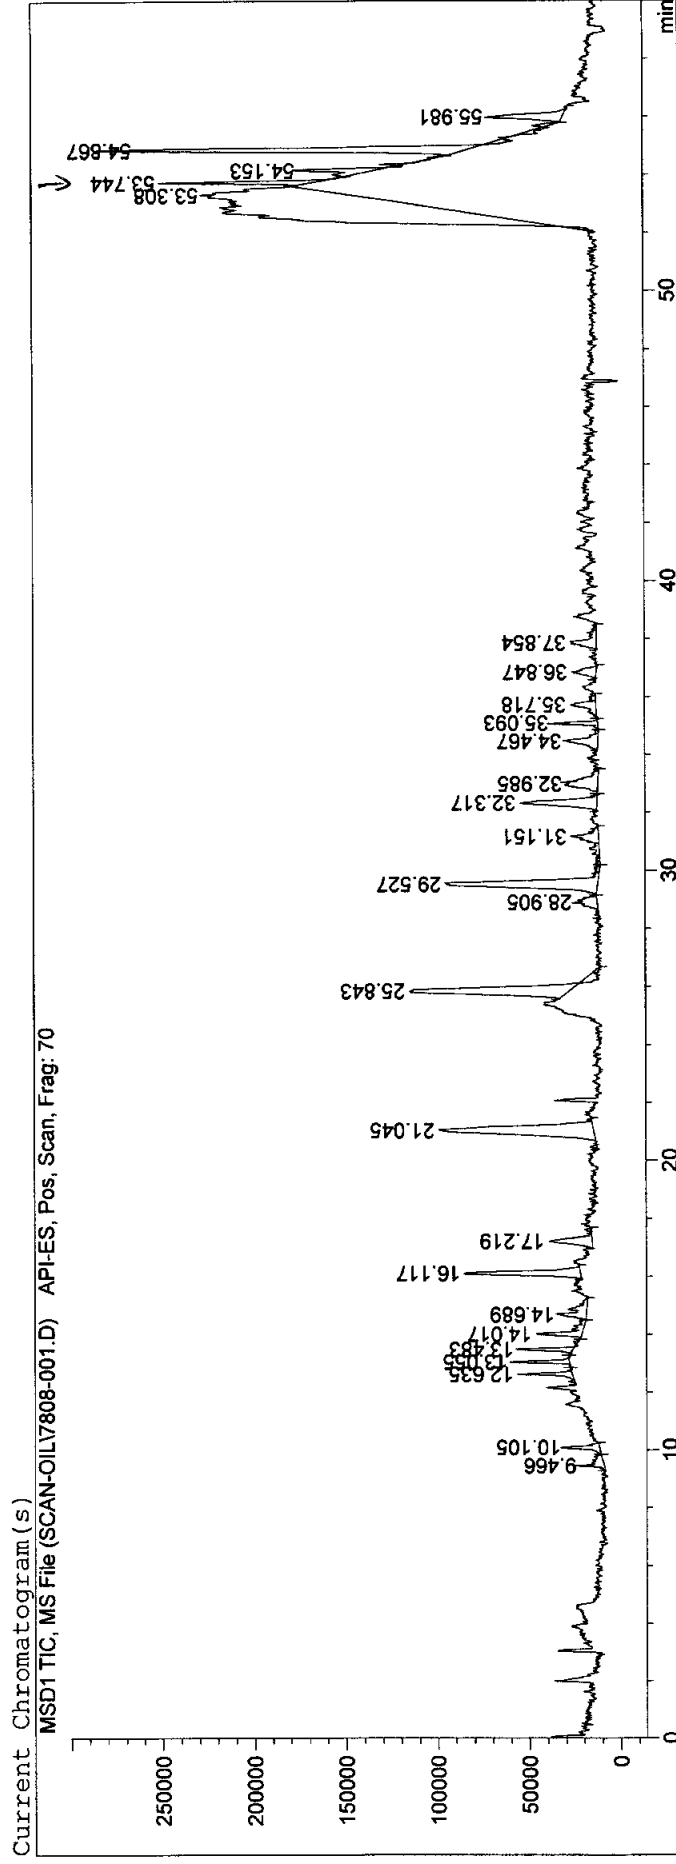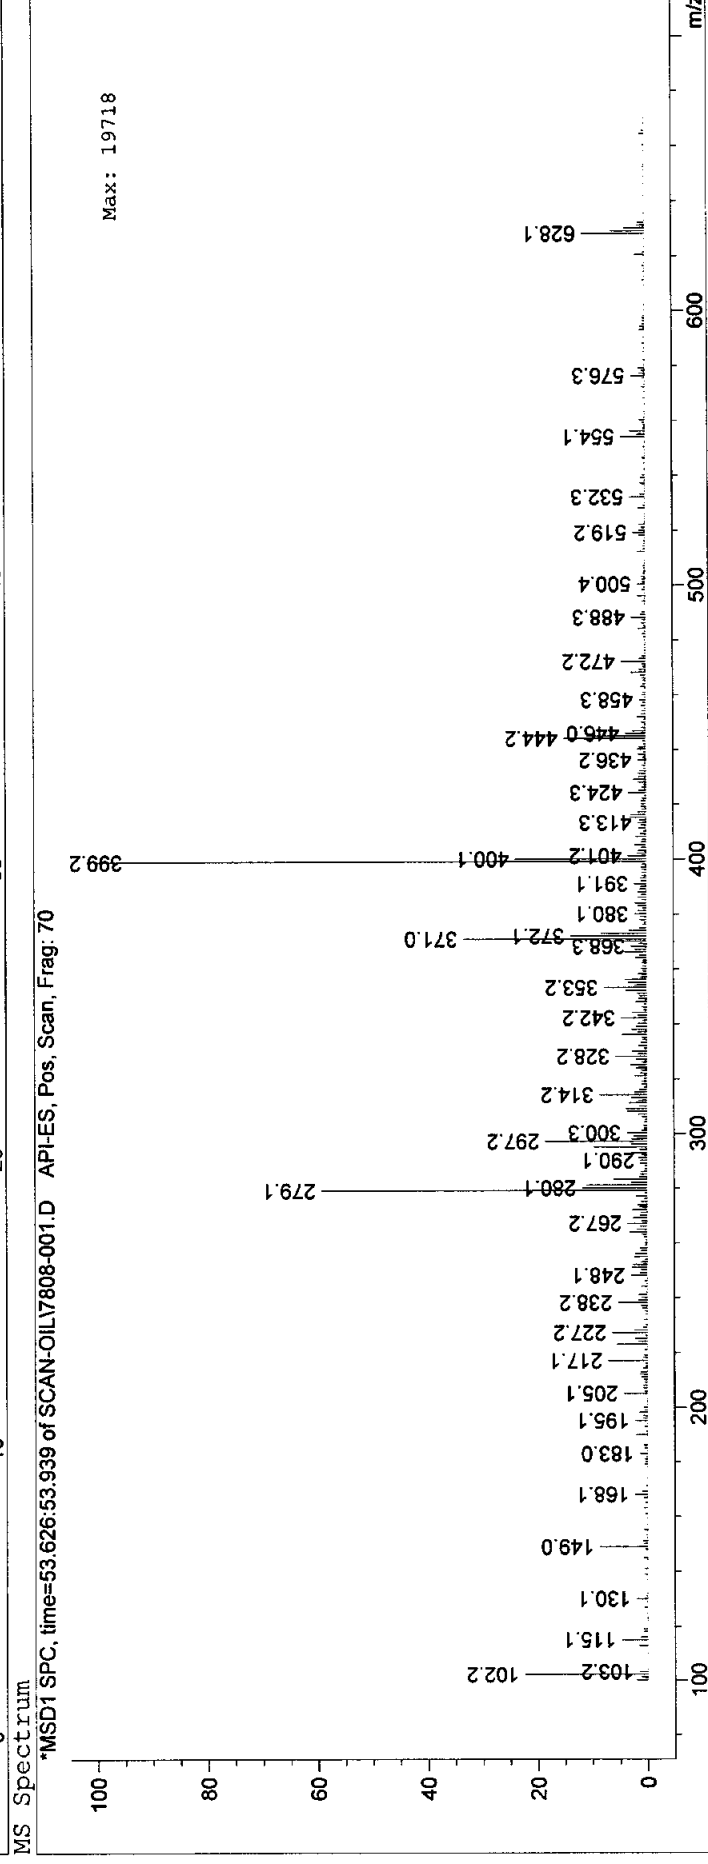

Current Chromatogram(s)  
MSD1 TIC, MS File (SCAN-OIL7808-001.D) API-ES, Pos, Scan, Frag: 70

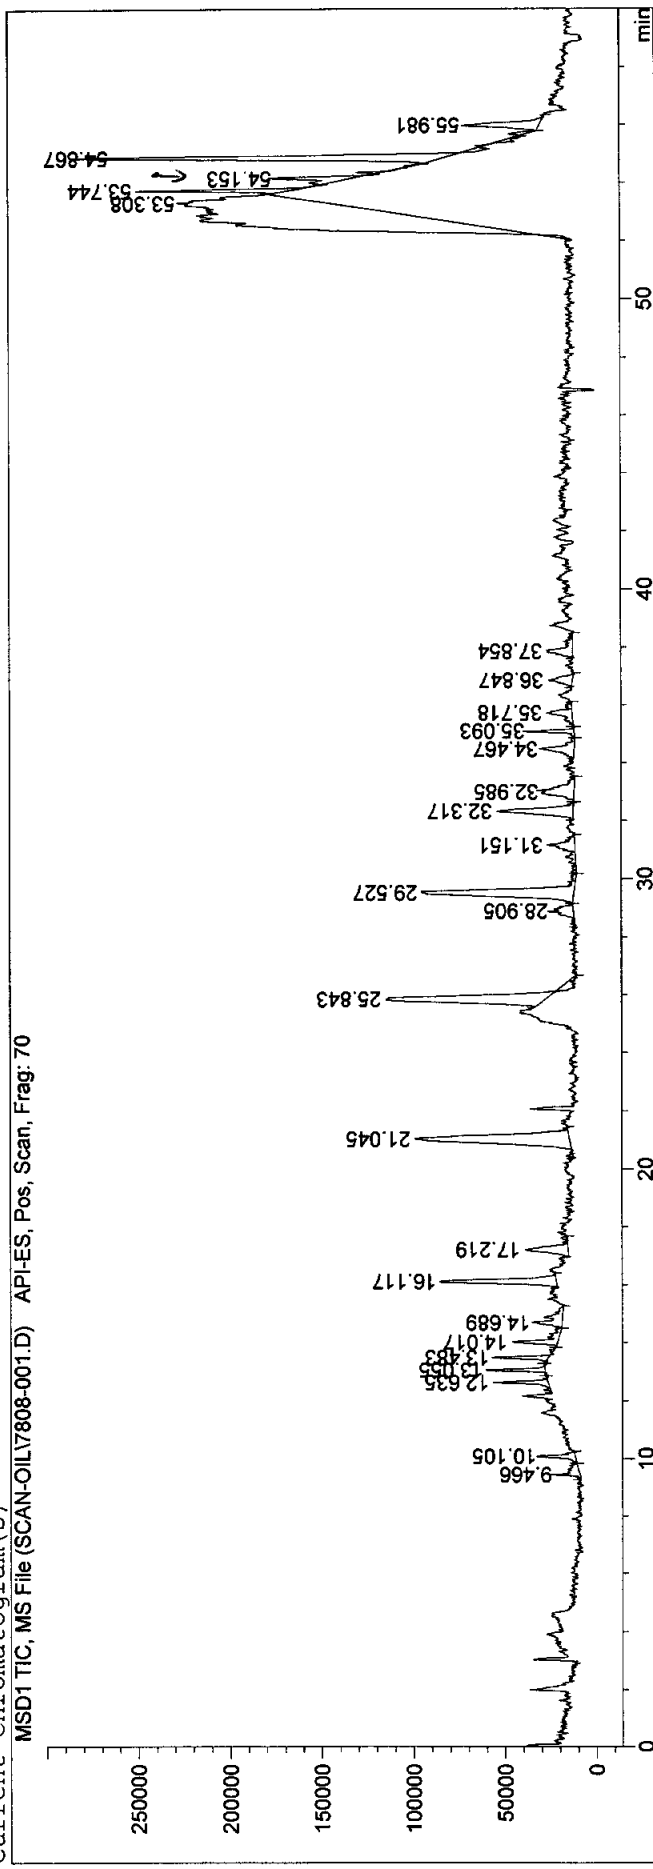

MS Spectrum  
\*MSD1 SPC, time=53.939:54.639 of SCAN-OIL7808-001.D API-ES, Pos, Scan, Frag: 70

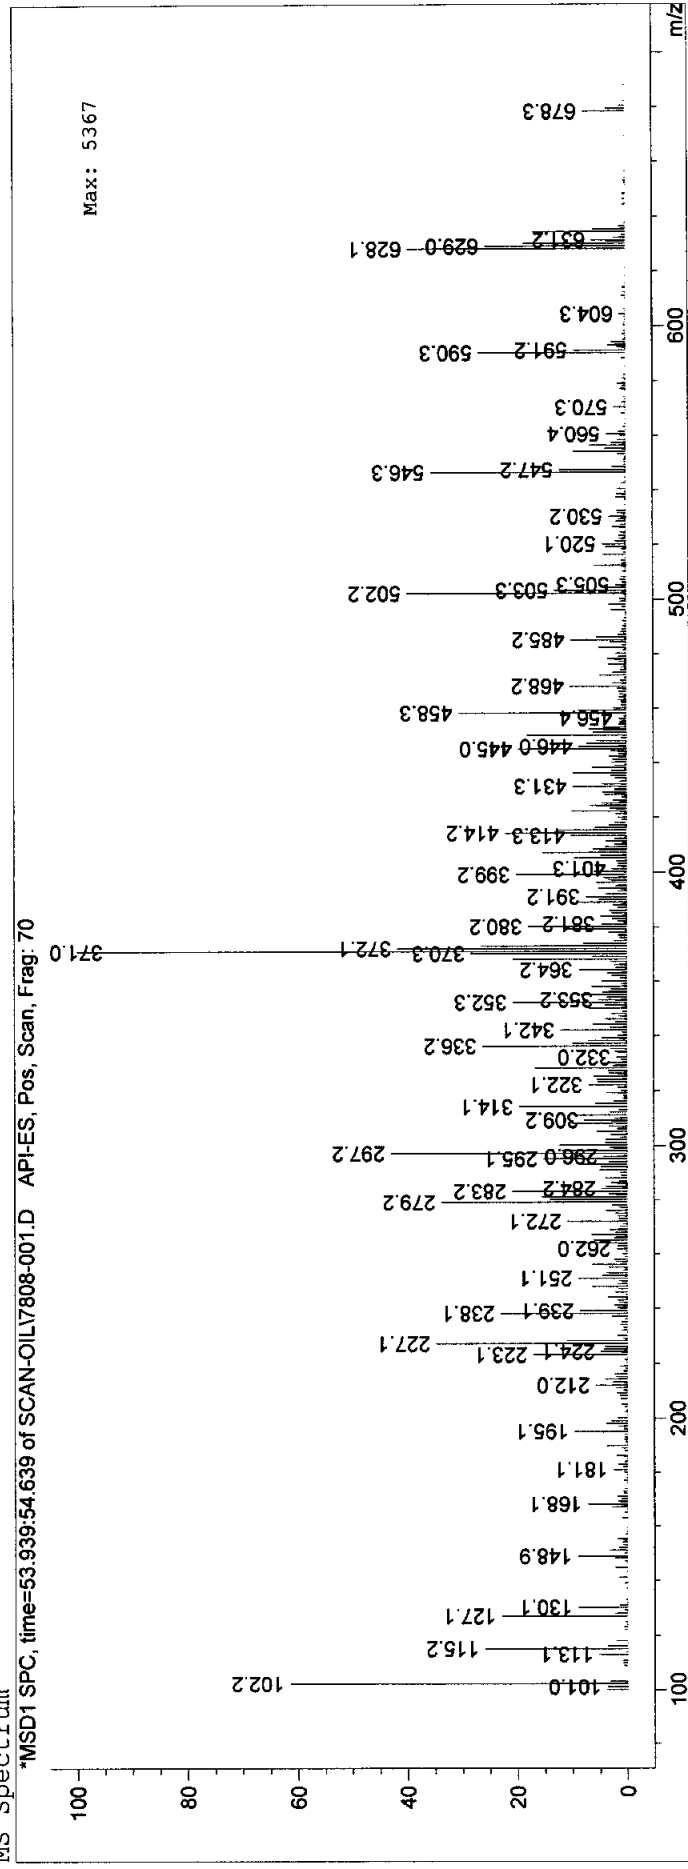

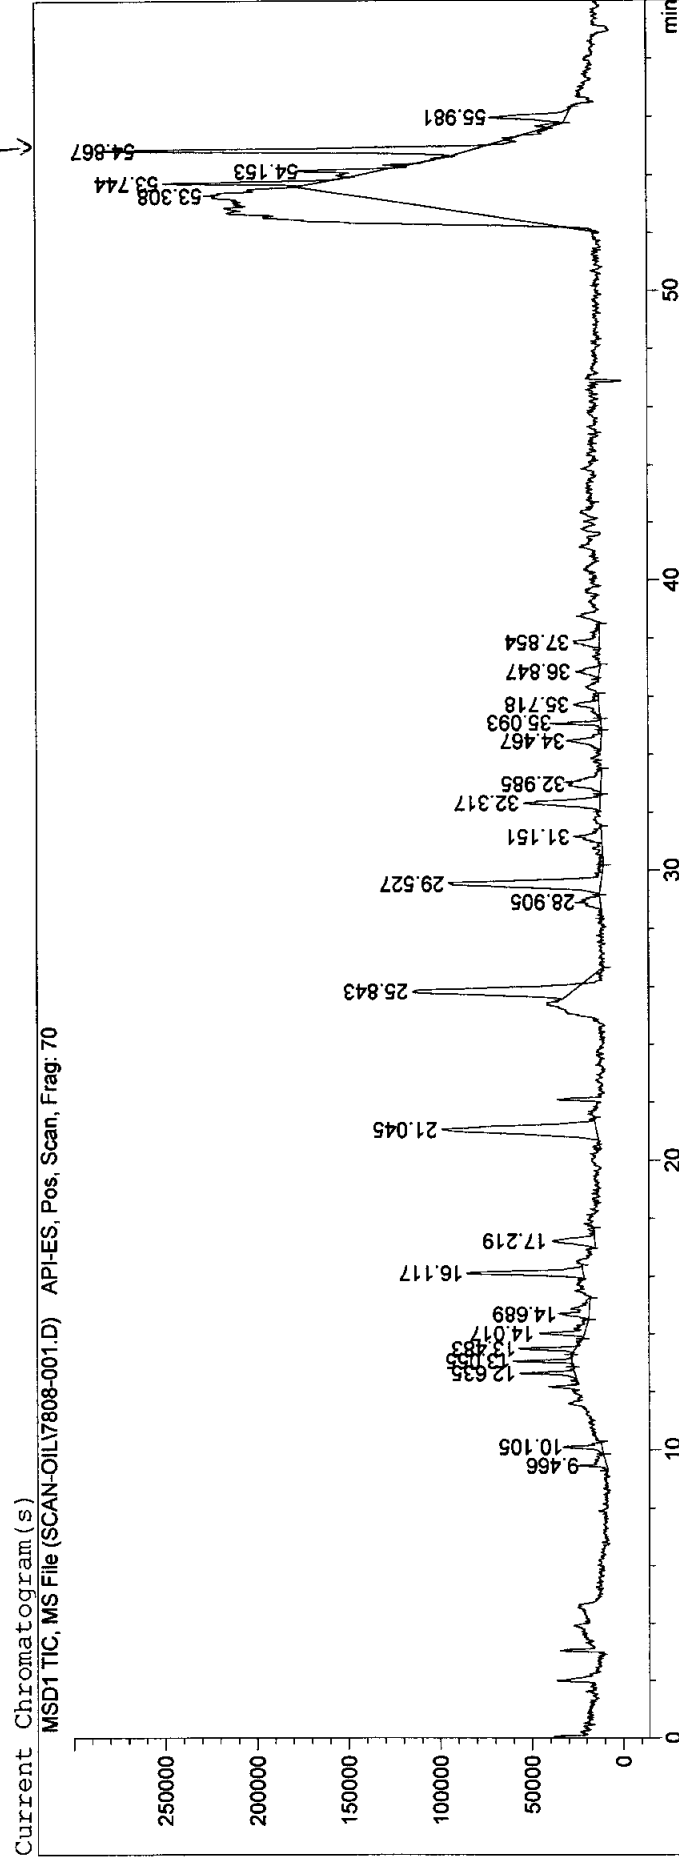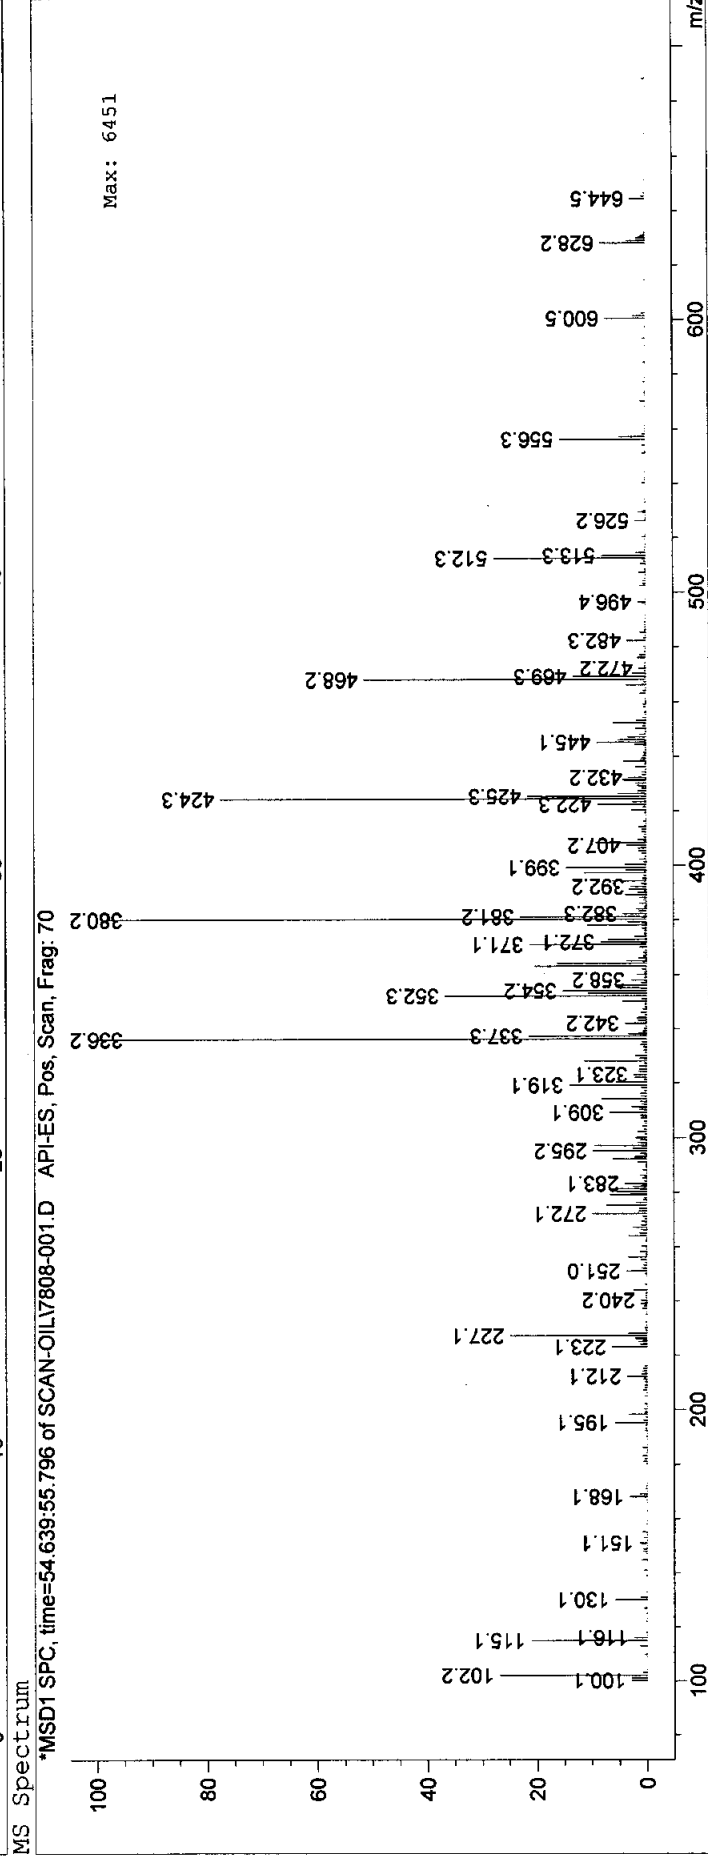

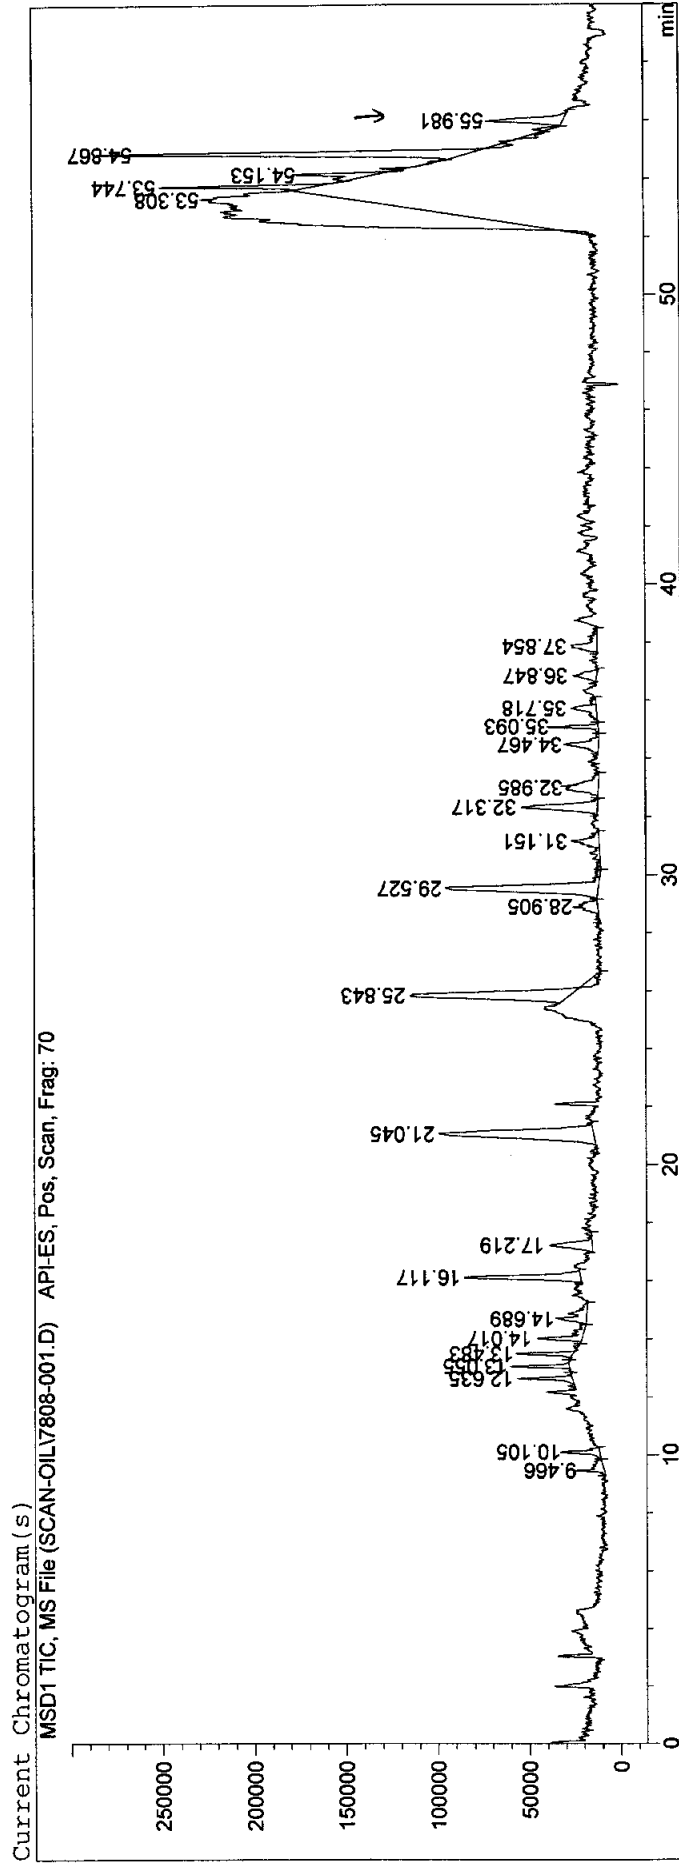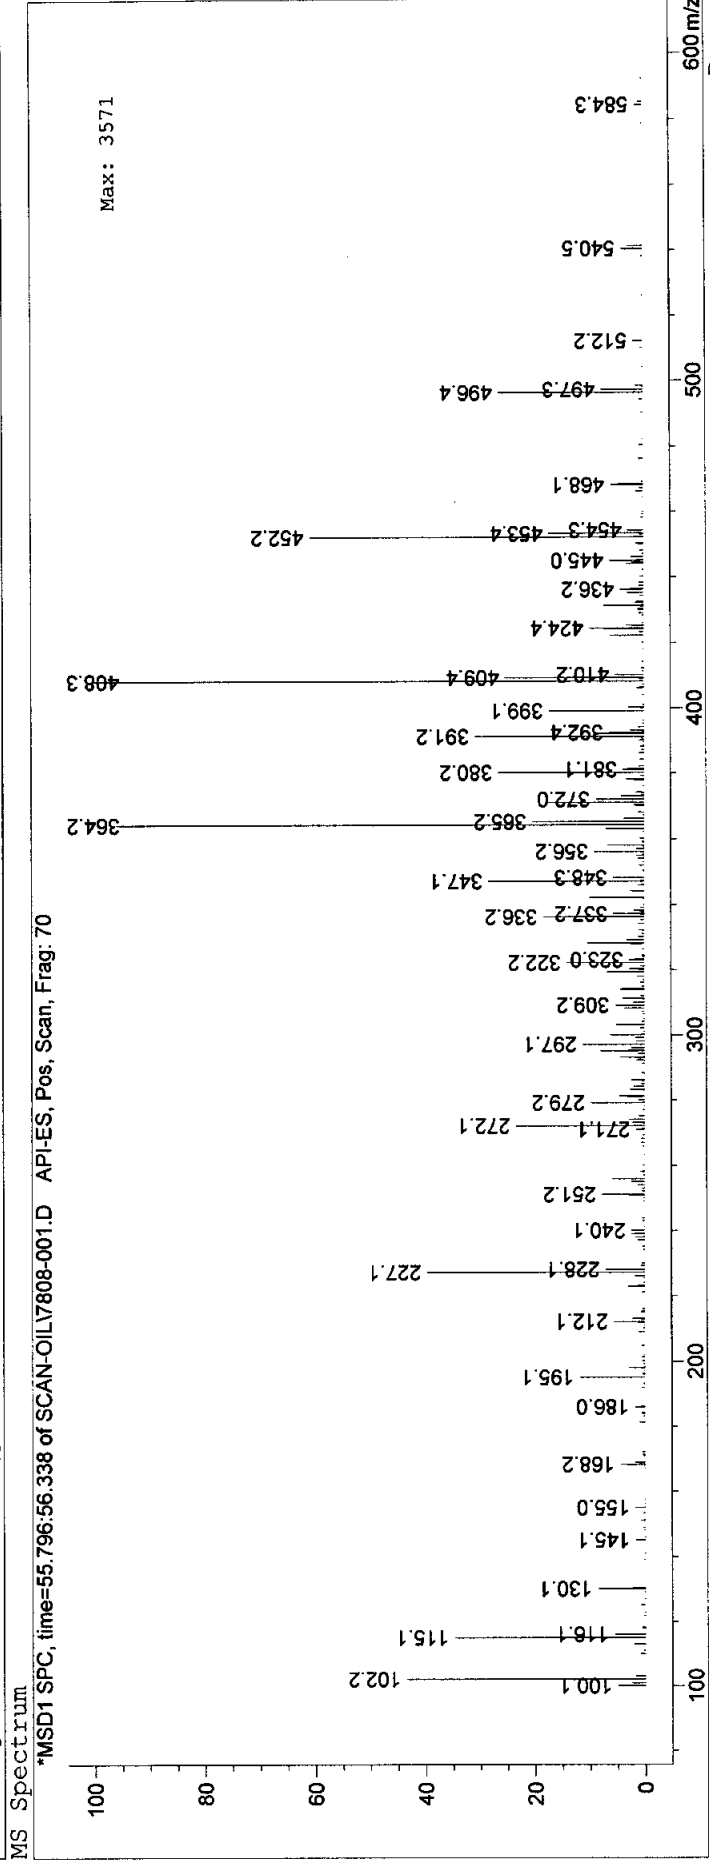

Supplement: s1 [file s1]
