# Supplementary material for: Phytosterol, Lipid and Phenolic Composition, and Biological Activities of Guava Seed Oil
Source: MDPI journal article supplement (doi:10.3390/molecules25112474), 2020-05-27

File :  
Operator :  
Acquired :  
Instrument :  
Sample Name :  
Misc Info :  
Vial Number: 6

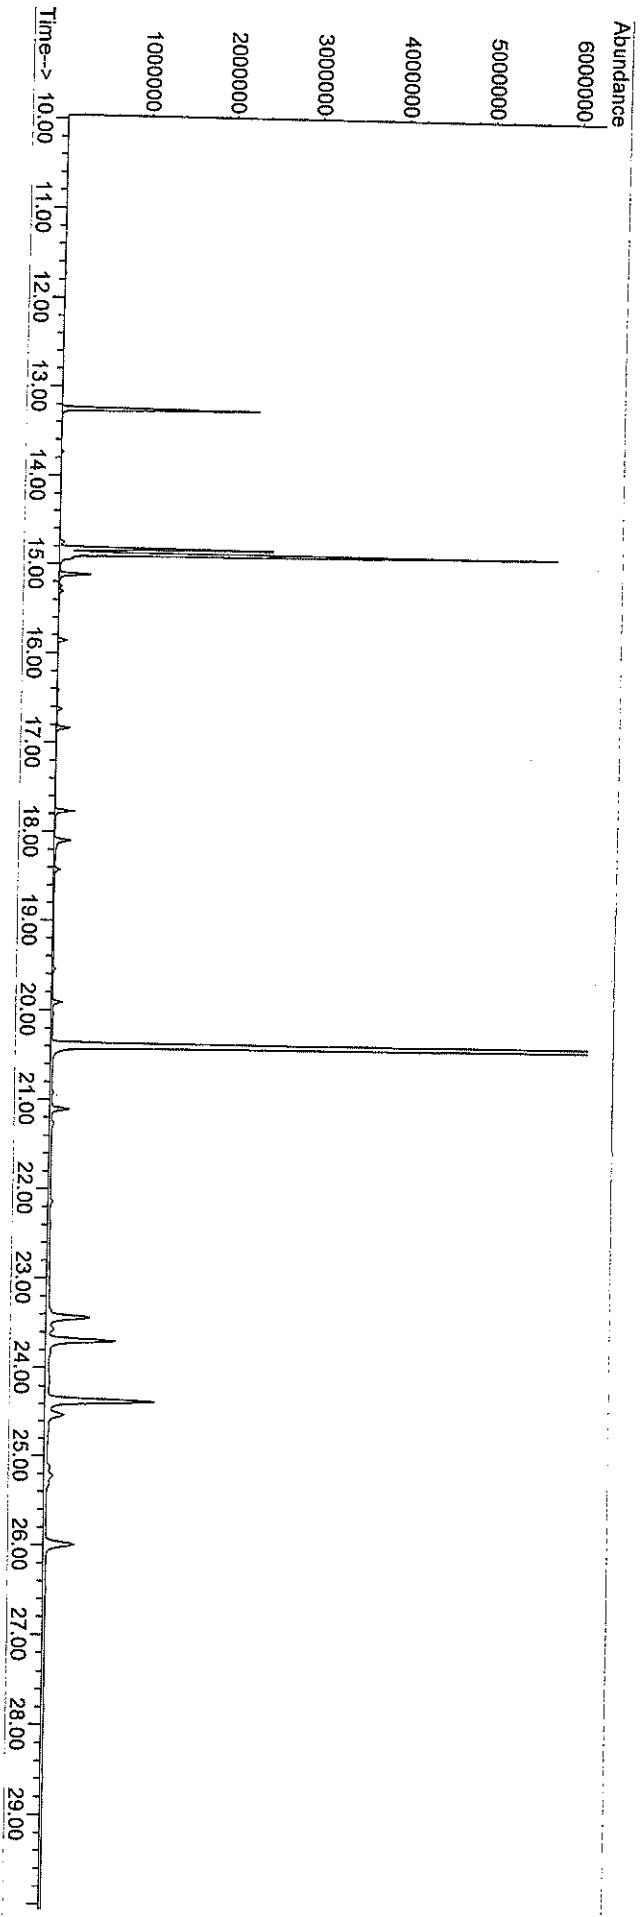

File : C  
Operator :  
Acquired :  
Instrument :  
Sample Name :  
Misc Info :  
Vial Number: 6

m/z 13.05 min

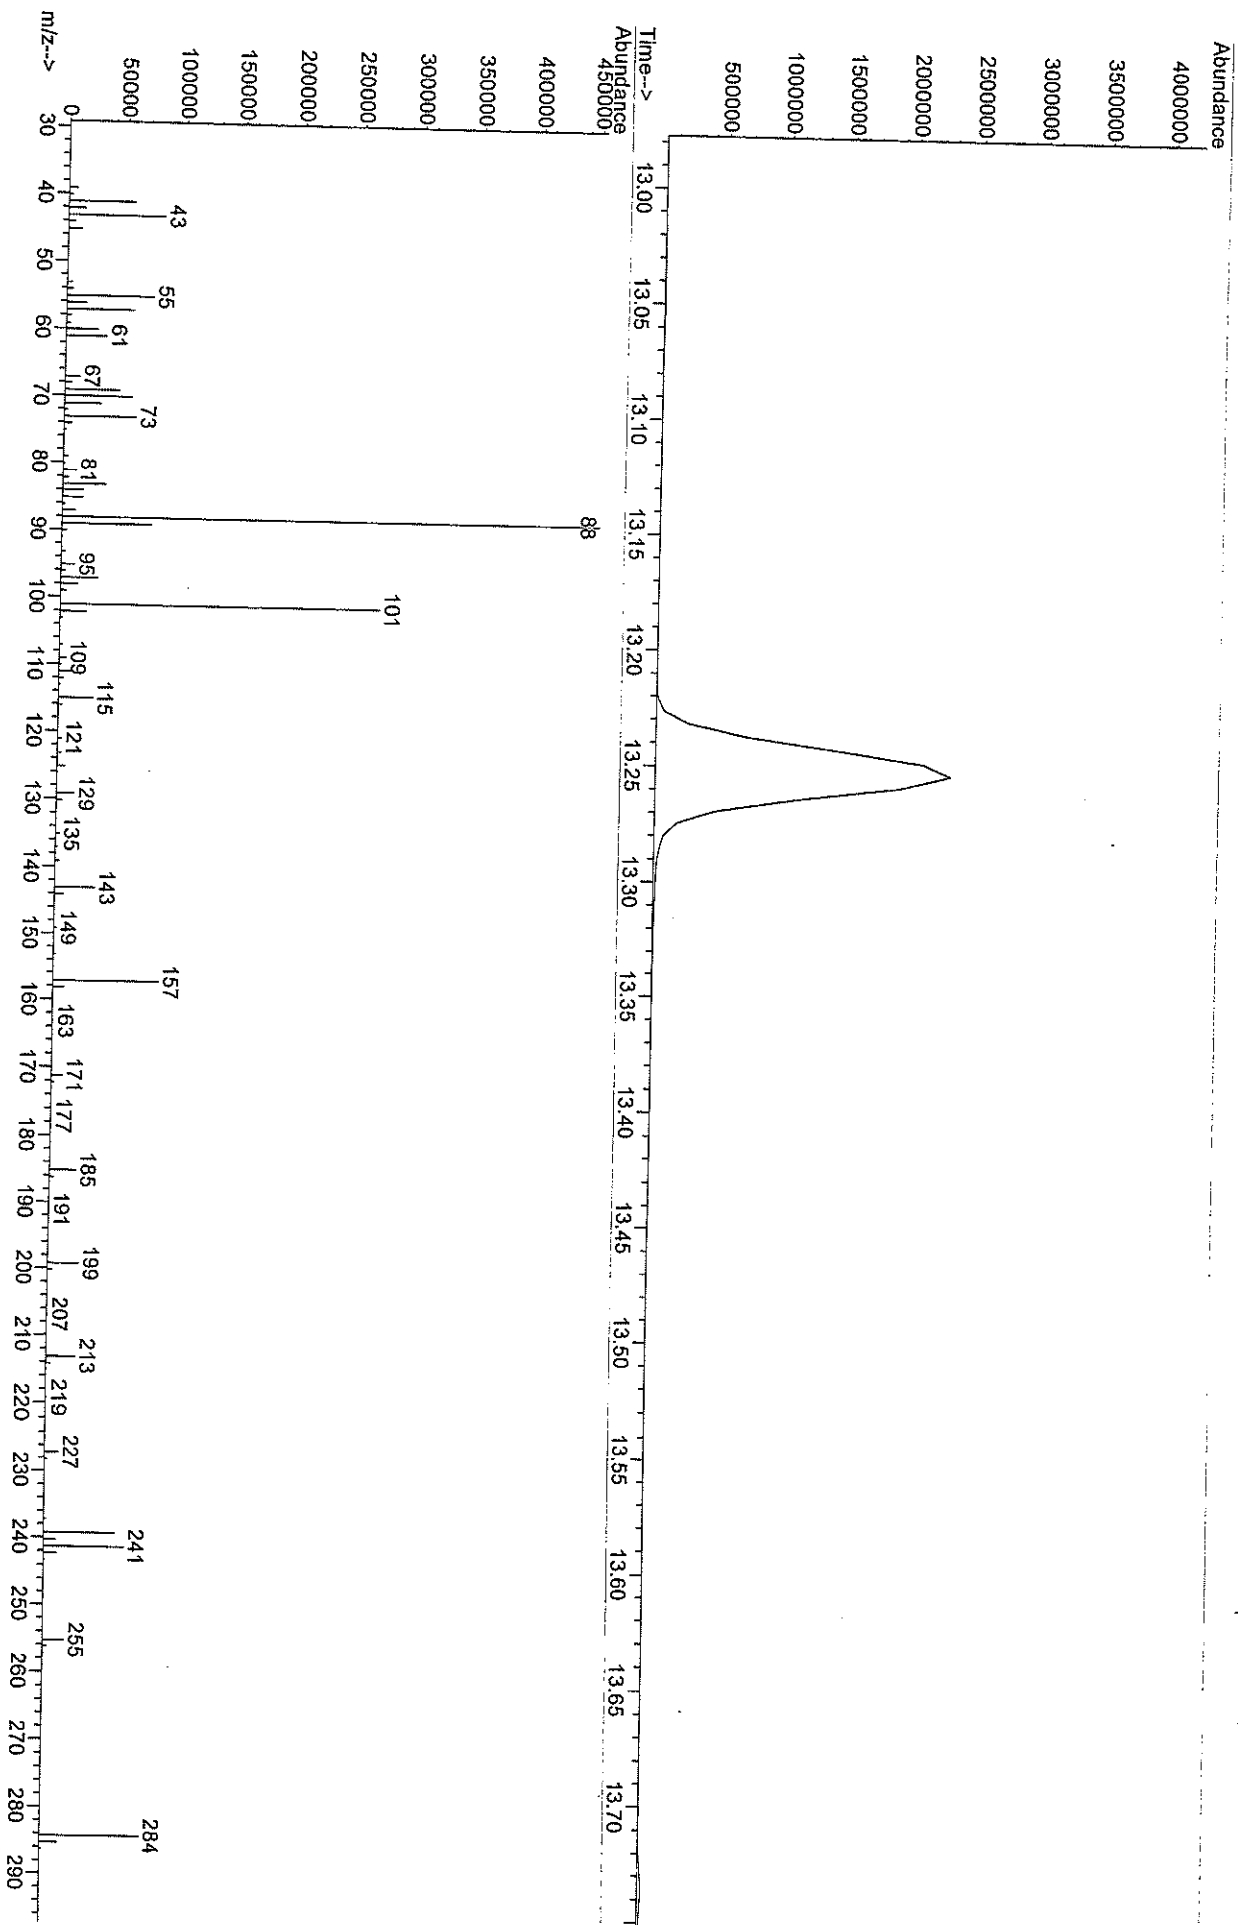

File :  
Operator :  
Acquired :  
Instrument :  
Sample Name :  
Misc Info :  
Vial Number: 6

M/z 14.83 min

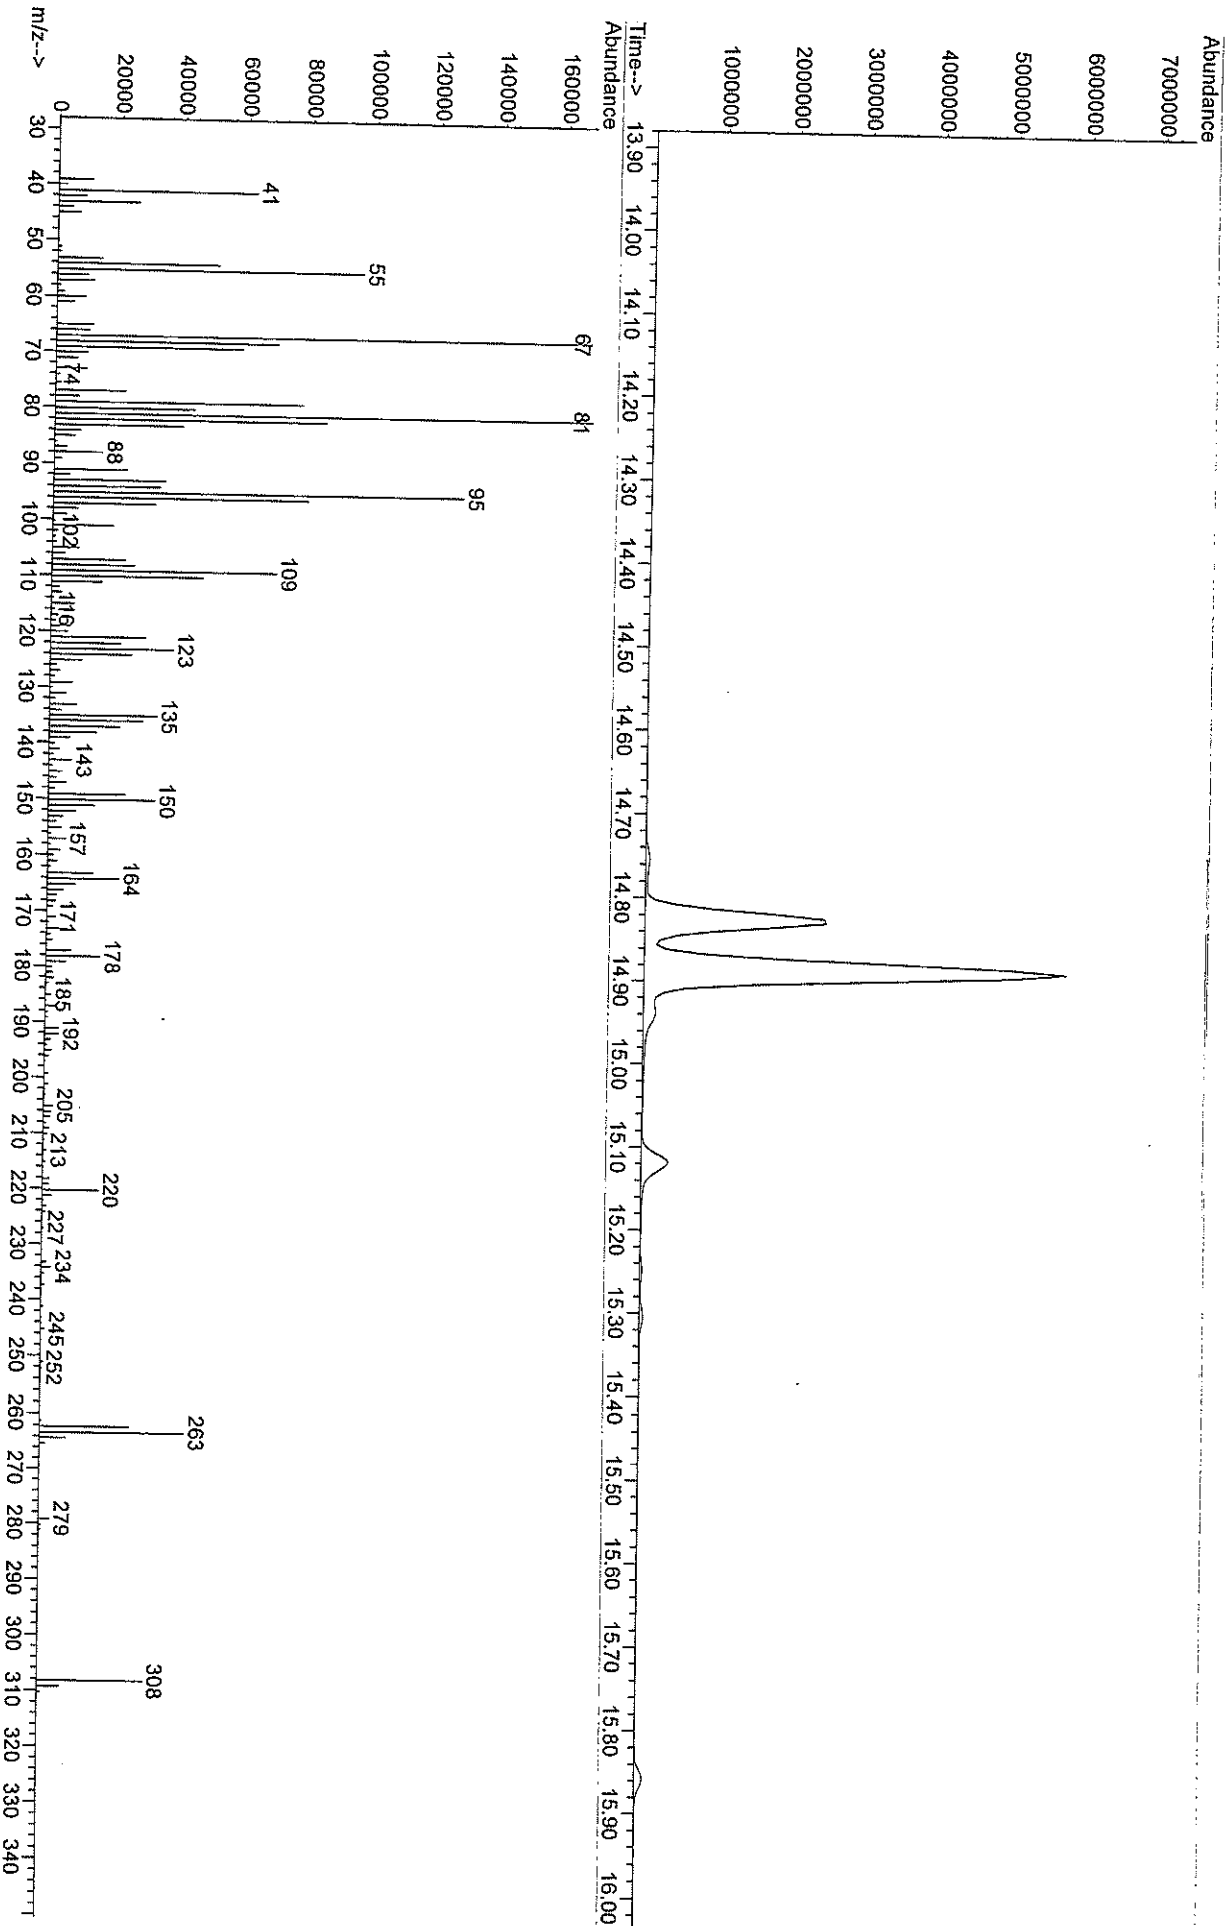

File :  
Operator :  
Acquired :  
Instrument :  
Sample Name :  
Misc Info :  
Vial Number: 6

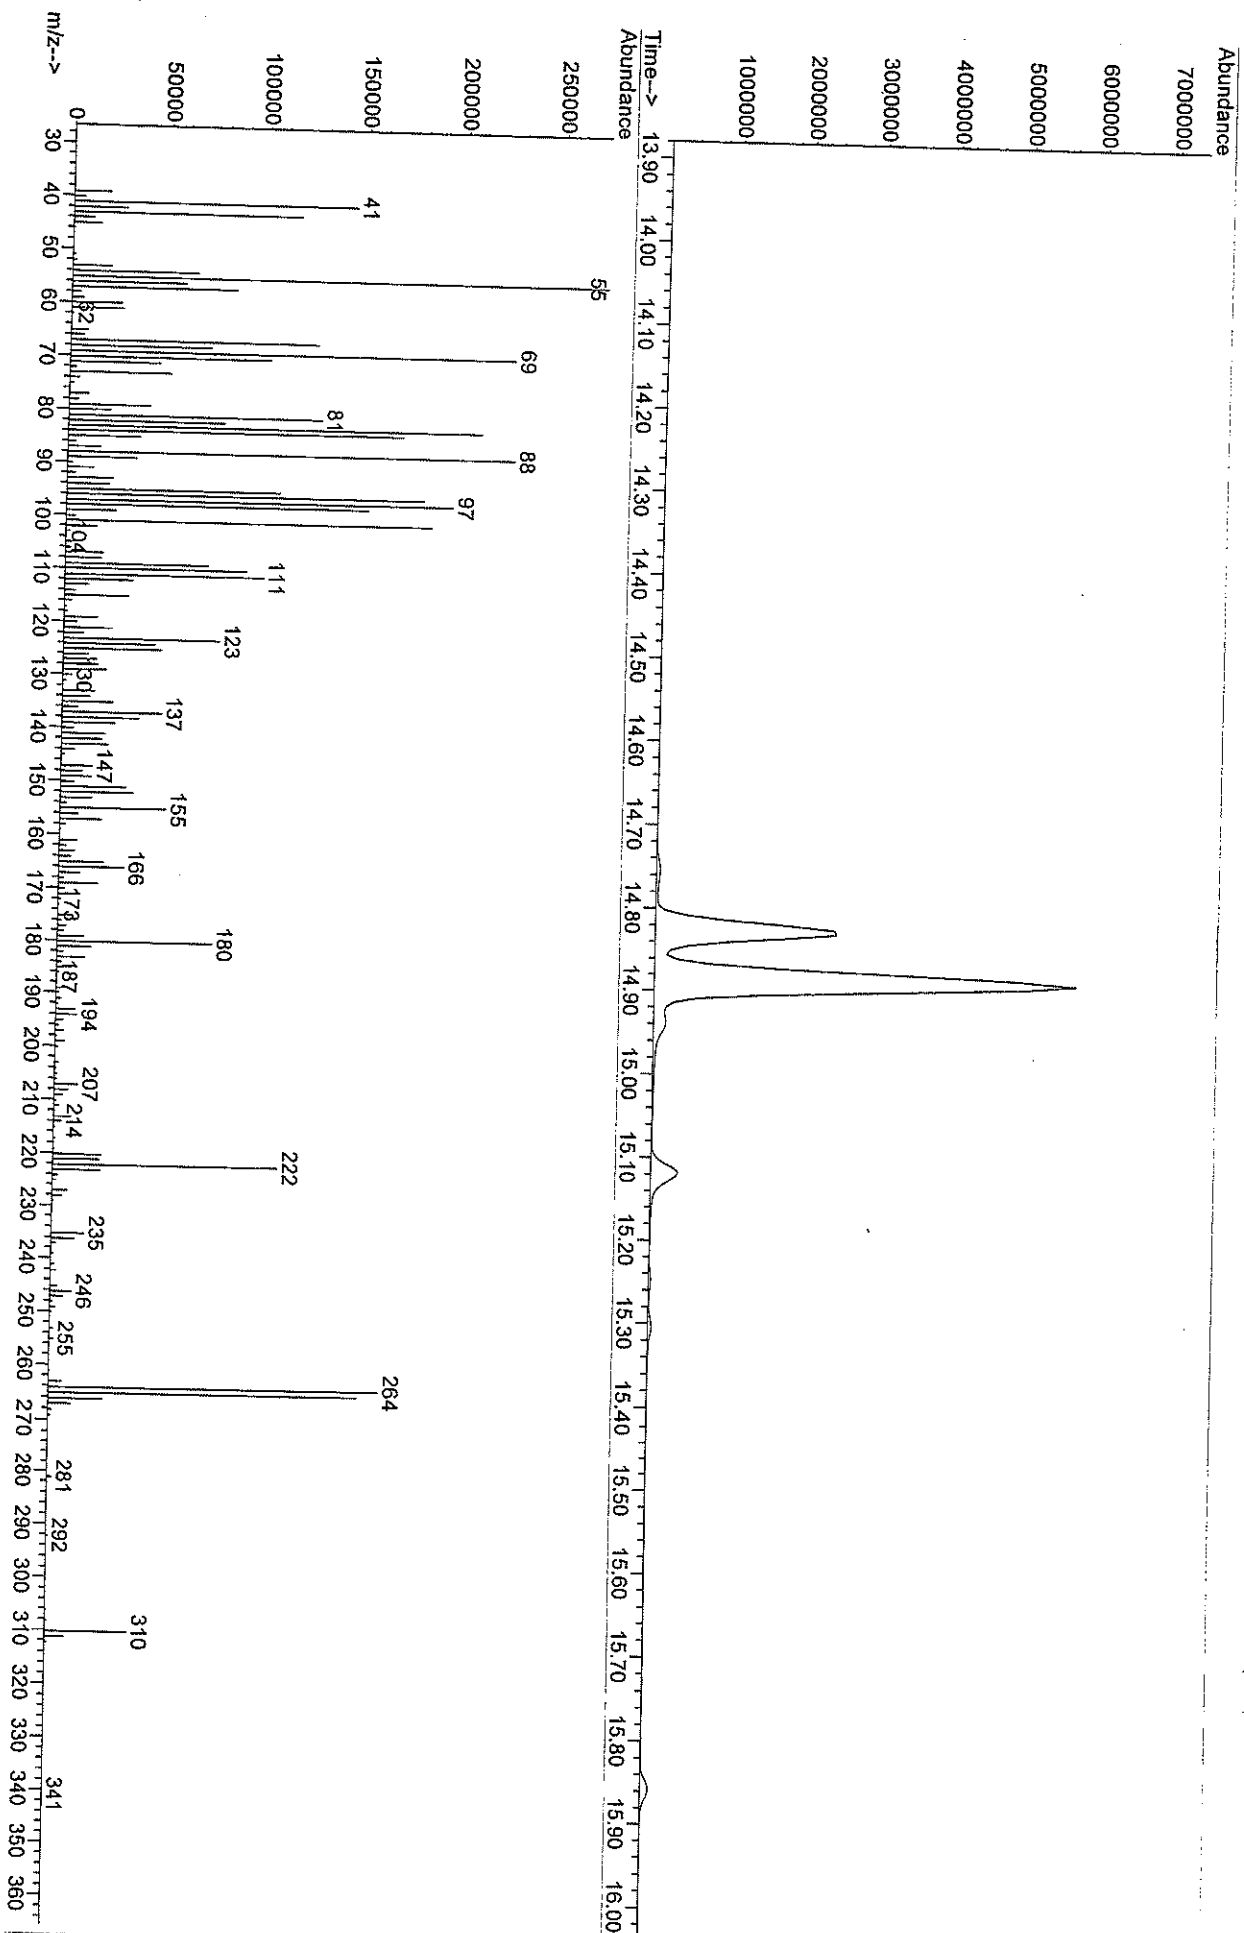

m/z 14.89 min

File :  
Operator :  
Acquired :  
Instrument :  
Sample Name :  
Misc Info :  
Vial Number: 6

M/E 15.18 min.

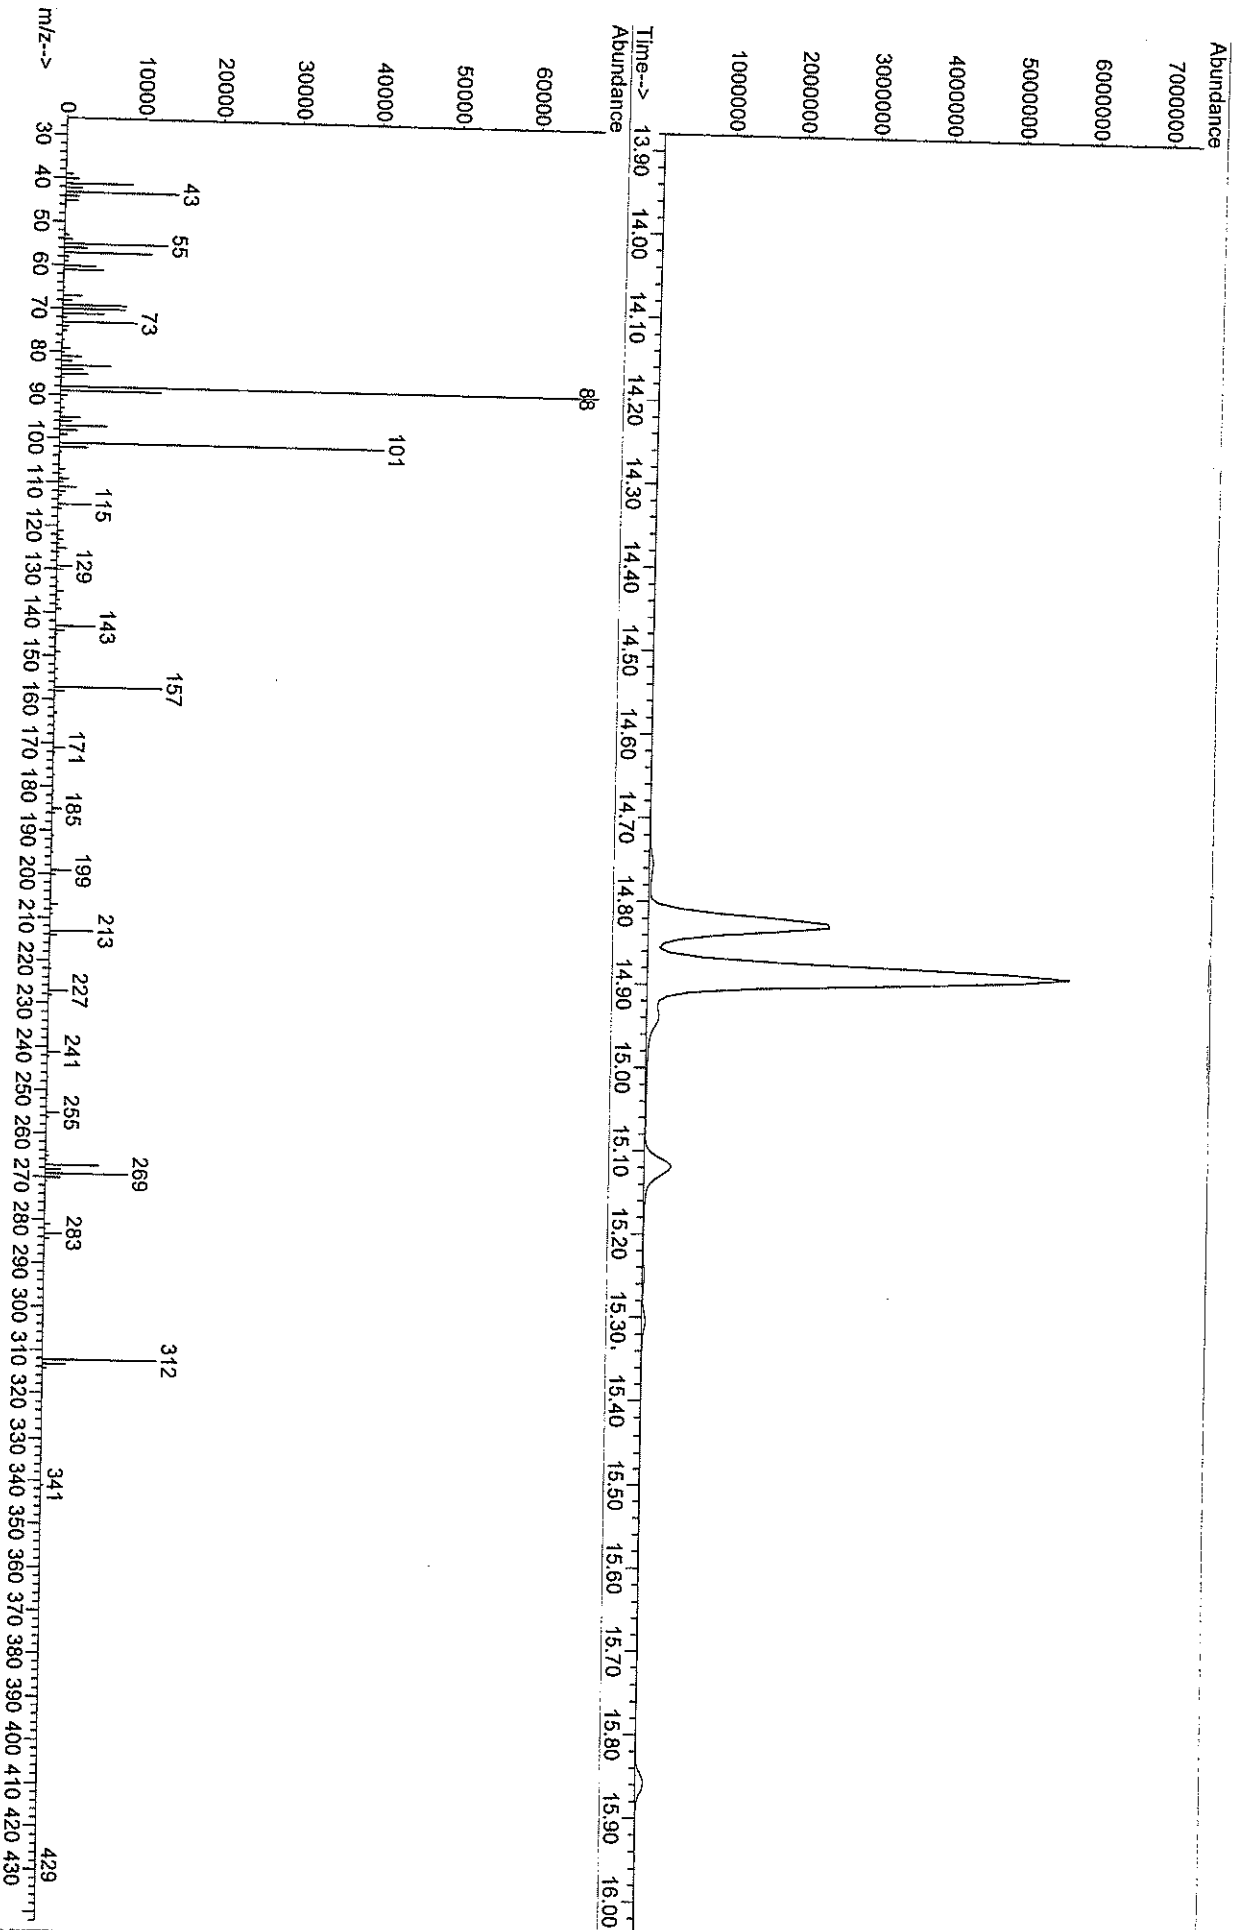

File :  
Operator :  
Acquired :  
Instrument :  
Sample Name :  
Misc Info :  
Vial Number: 6

17.97 min

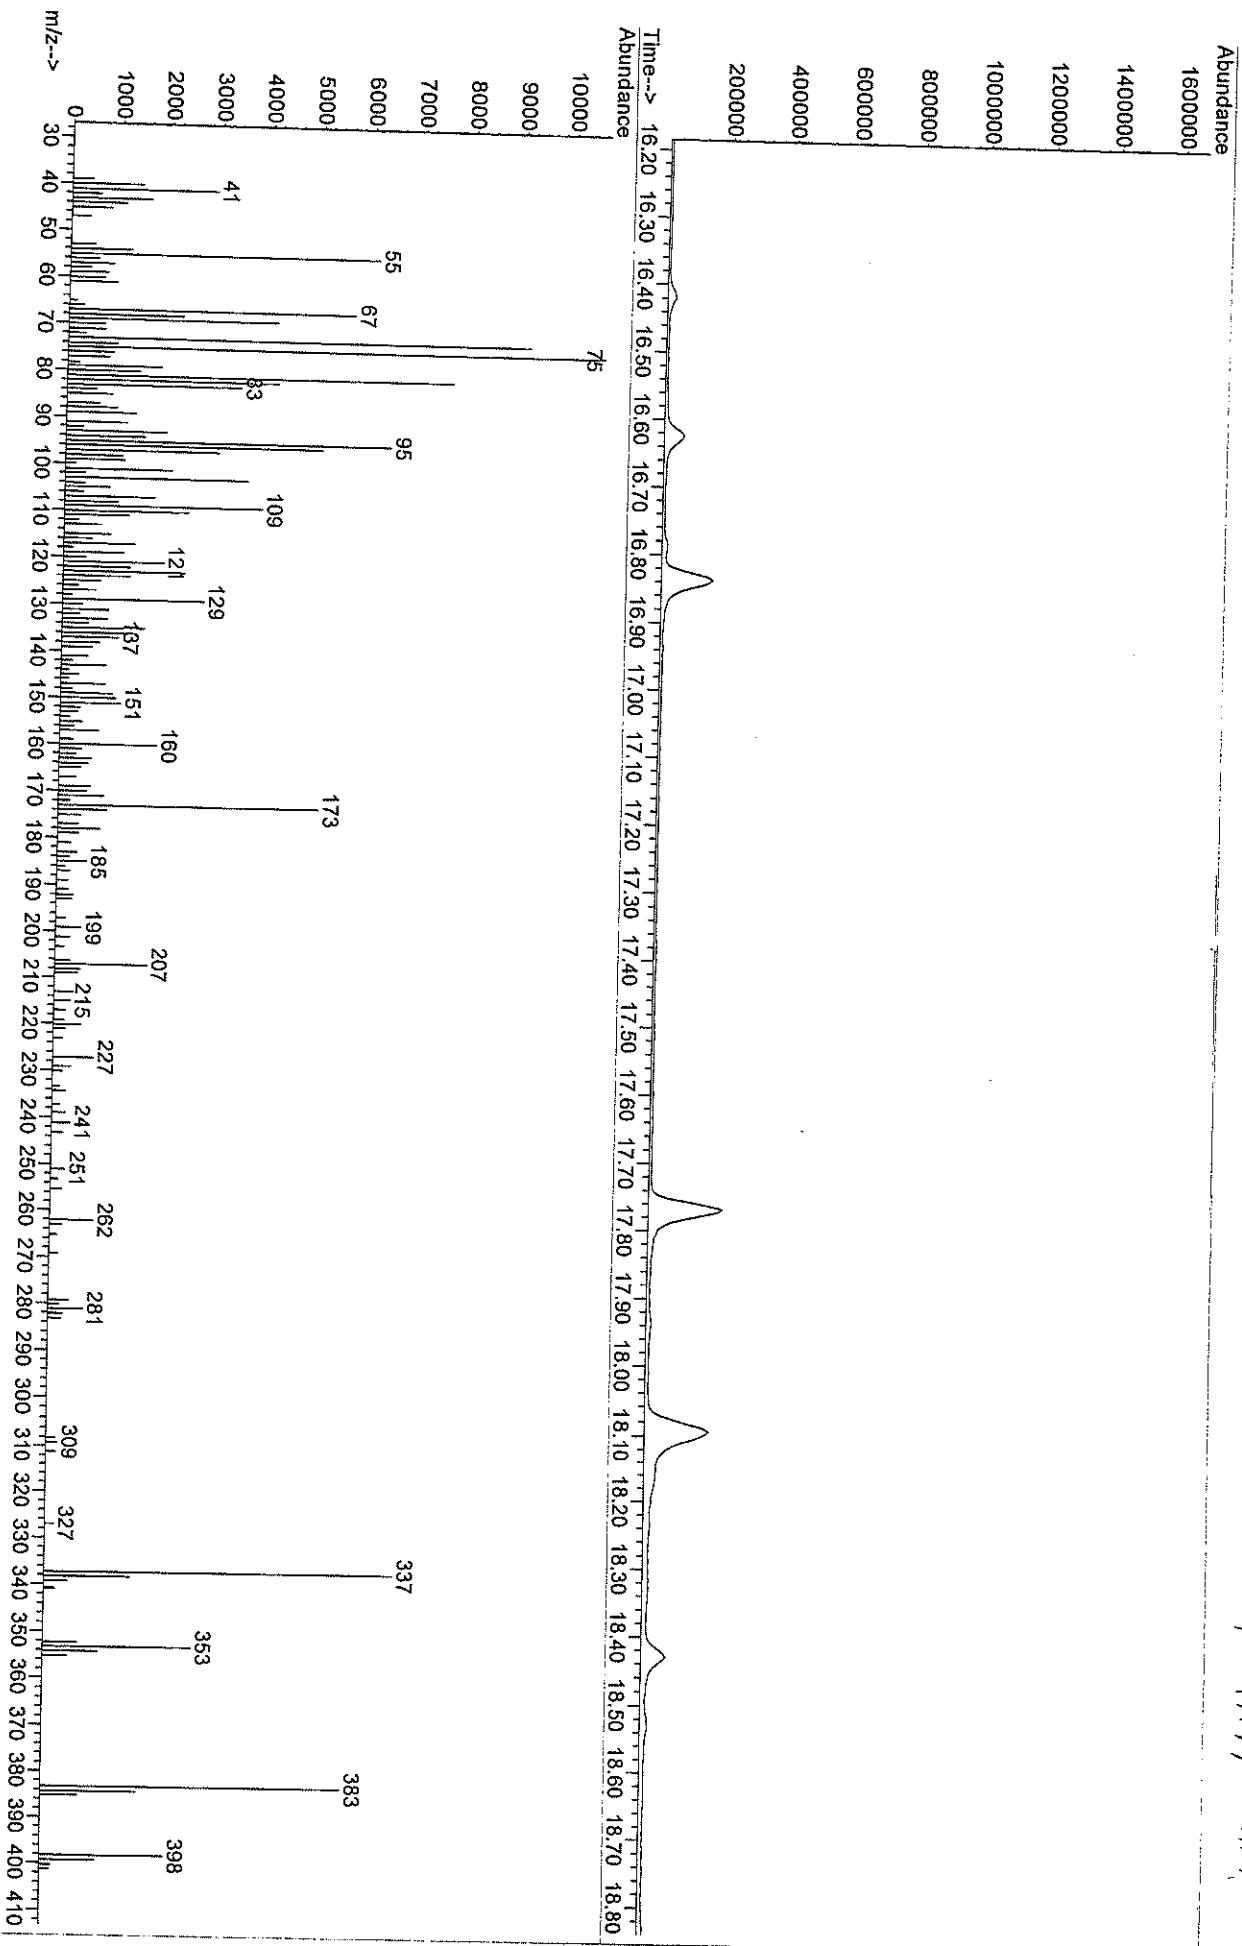

File :  
Operator :  
Acquired :  
Instrument :  
Sample Name :  
Misc Info :  
Vial Number: 6

MA 18.10 min.

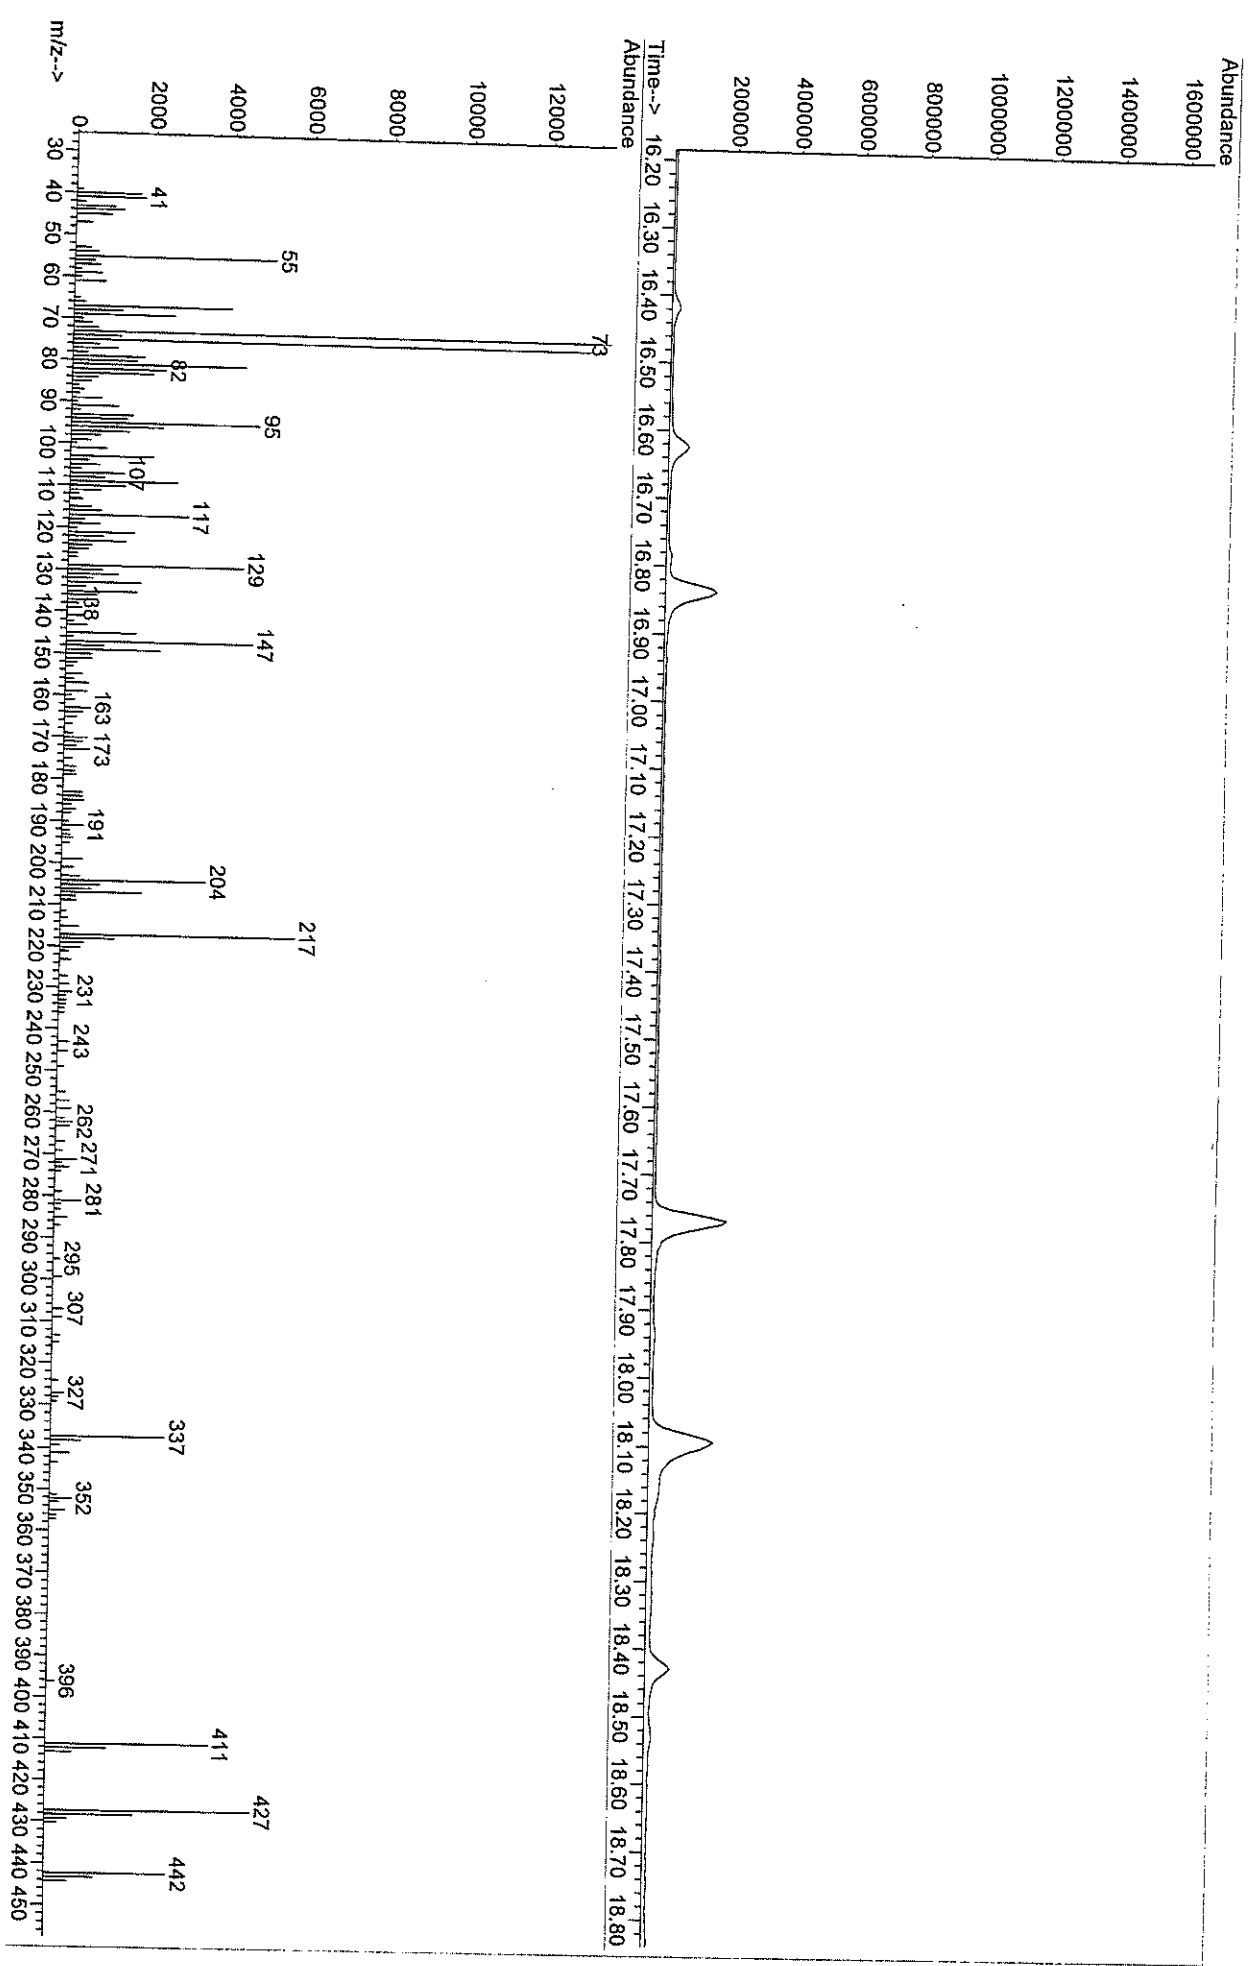

File :  
Operator :  
Acquired :  
Instrument :  
Sample Name :  
Misc Info :  
Vial Number: 6

(Internal standard)  
m/z 80.41 min

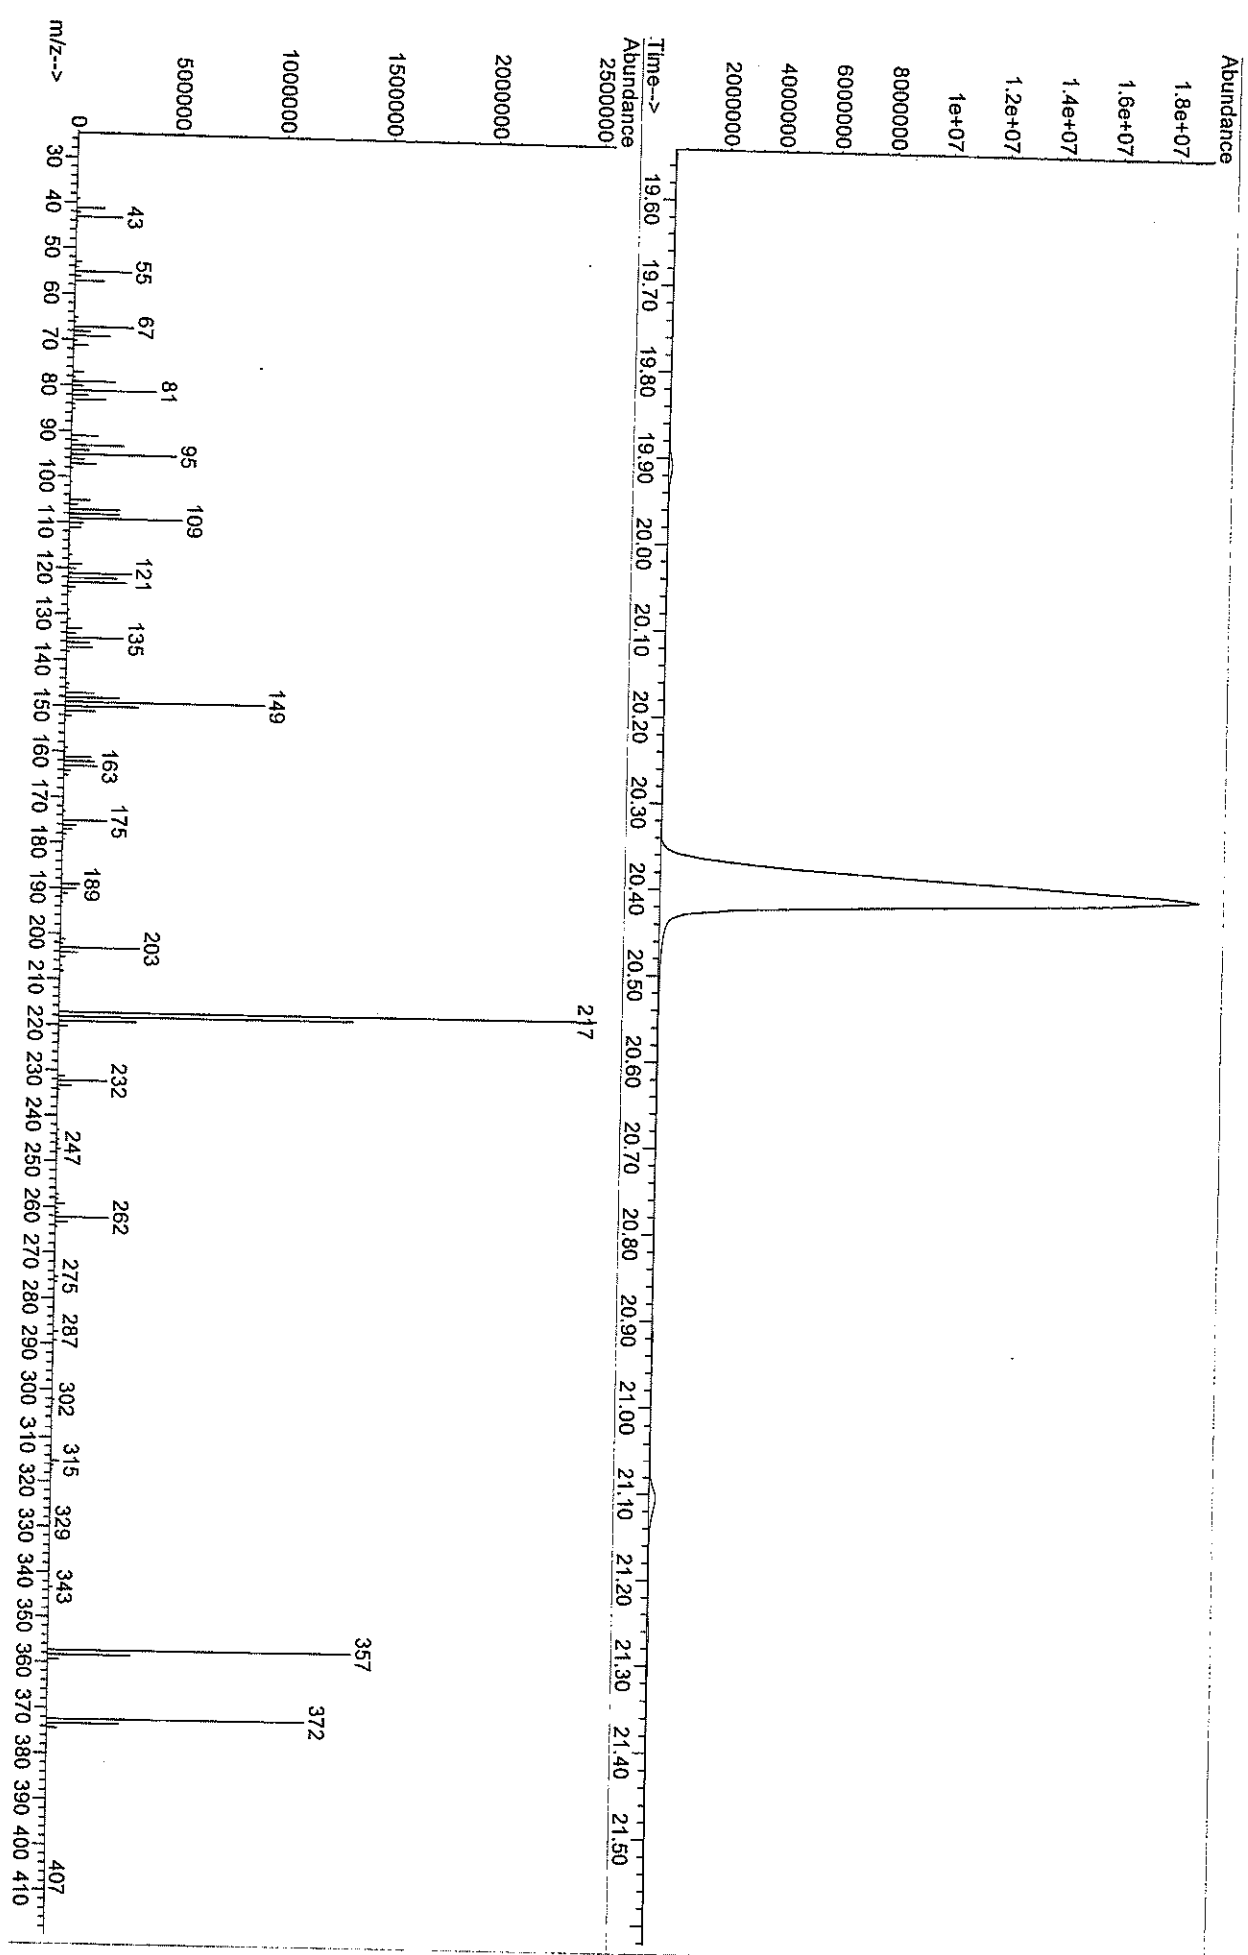



File  
Operator :  
Acquired :  
Instrument :  
Sample Name :  
Misc Info :  
Vial Number: 6

m/e 23.90 min.

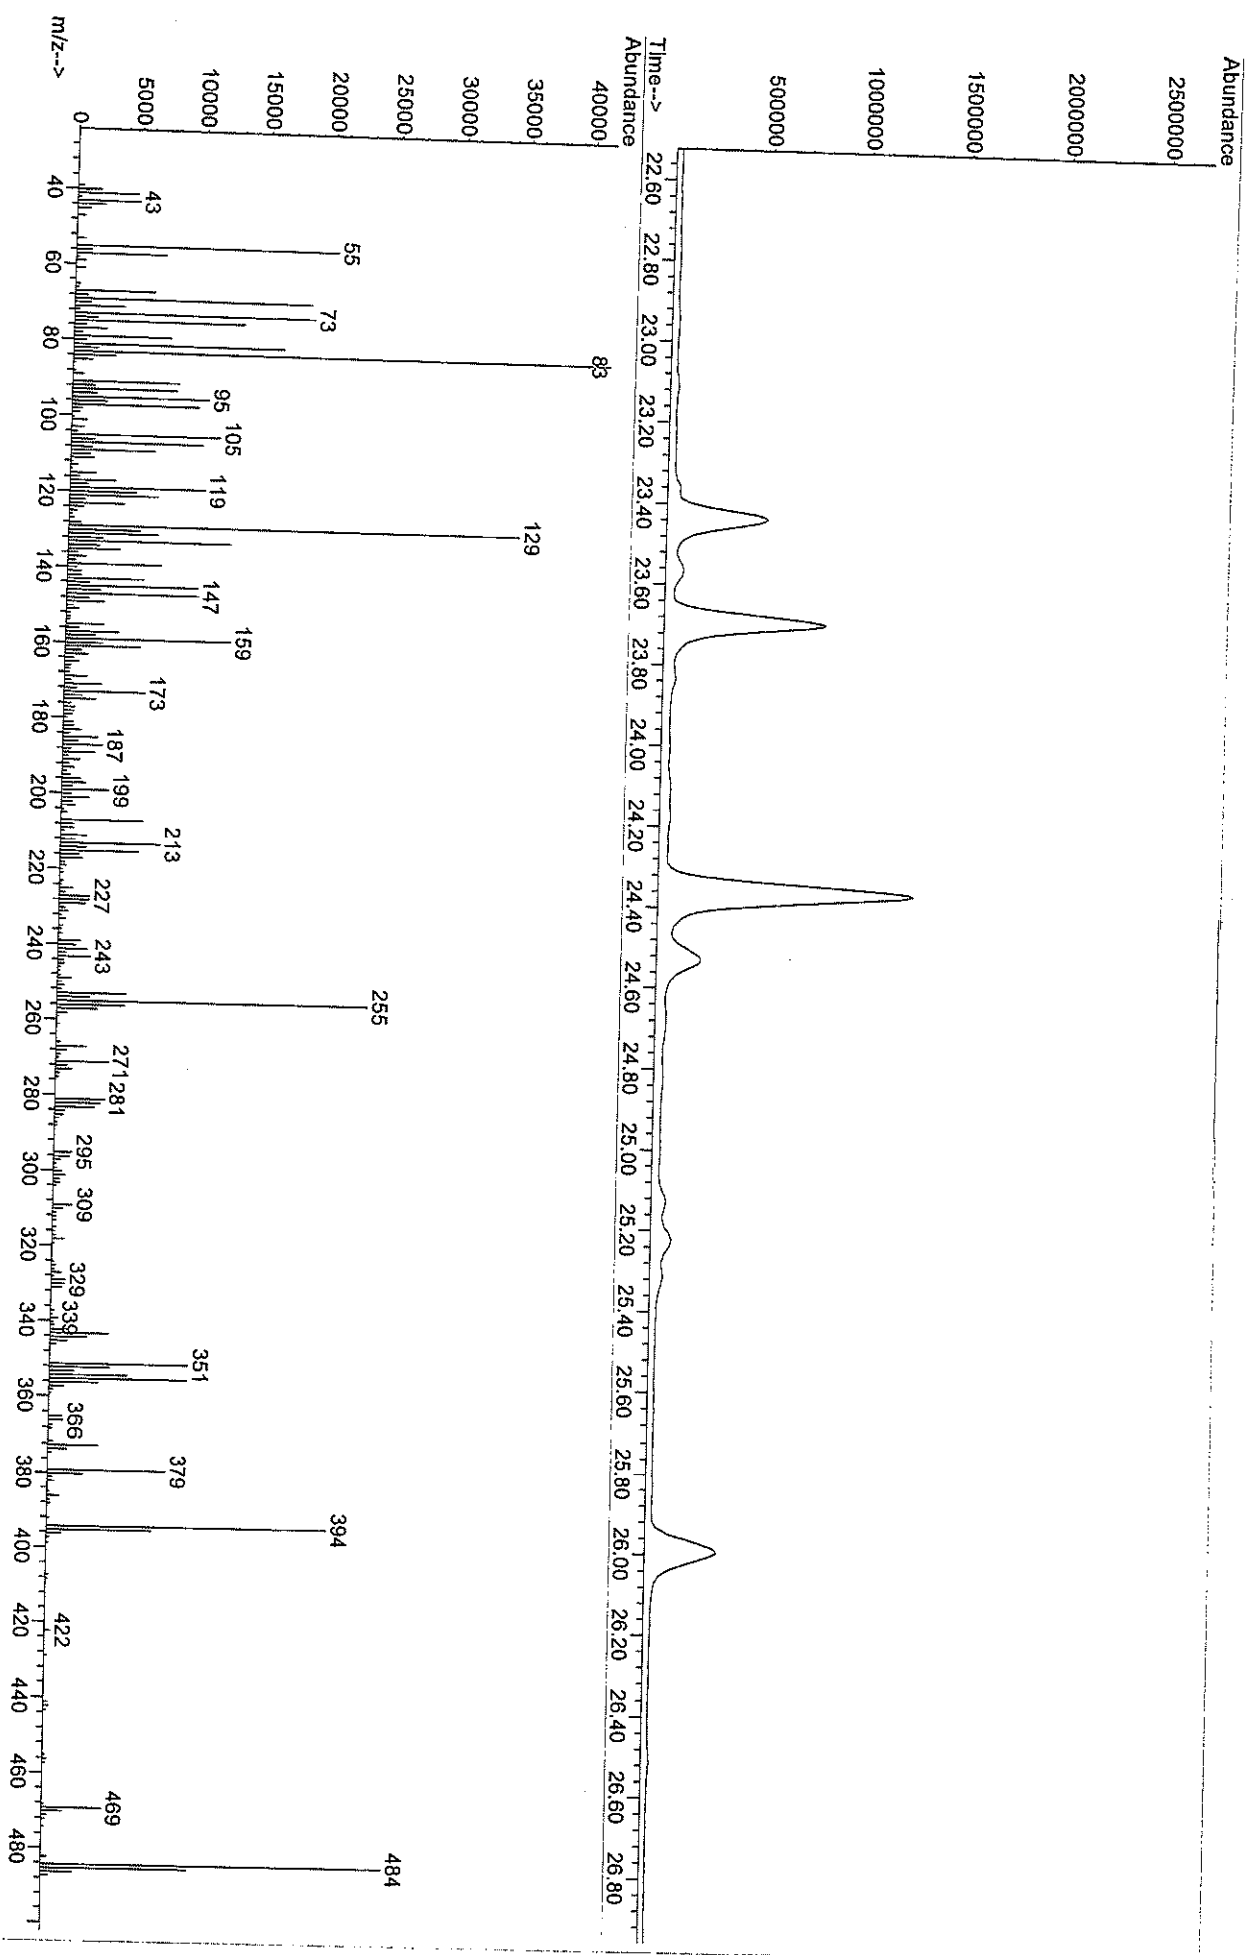

File :  
Operator :  
Acquired :  
Instrument :  
Sample Name :  
Misc Info :  
Vial Number: 6

$m/z = 24.39 \text{ min.}$

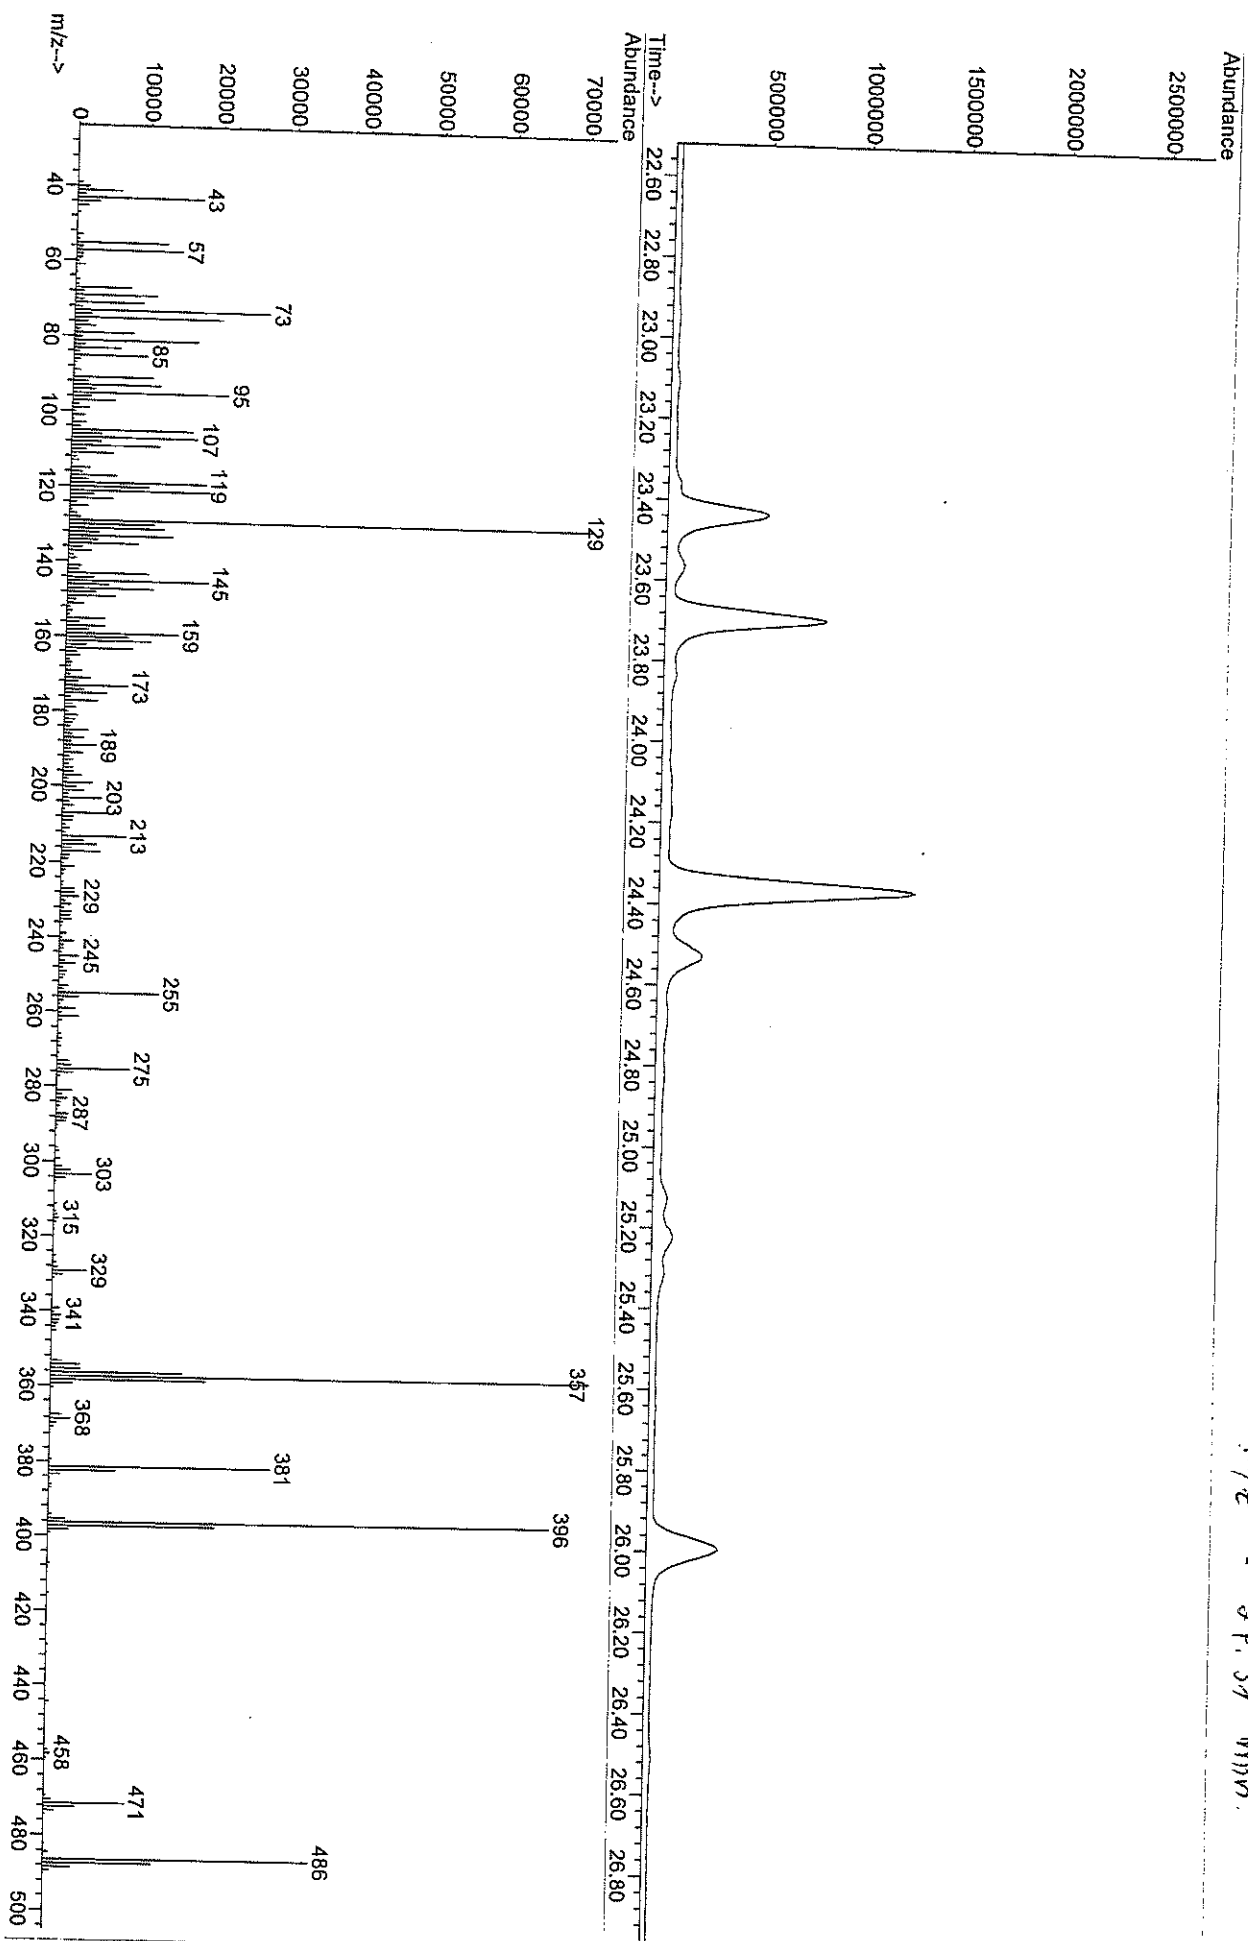

File :  
Operator :  
Acquired :  
Instrument :  
Sample Name :  
Misc Info :  
Vial Number: 6

Campesferol - 9MS.  
m/e 83, 44 min.

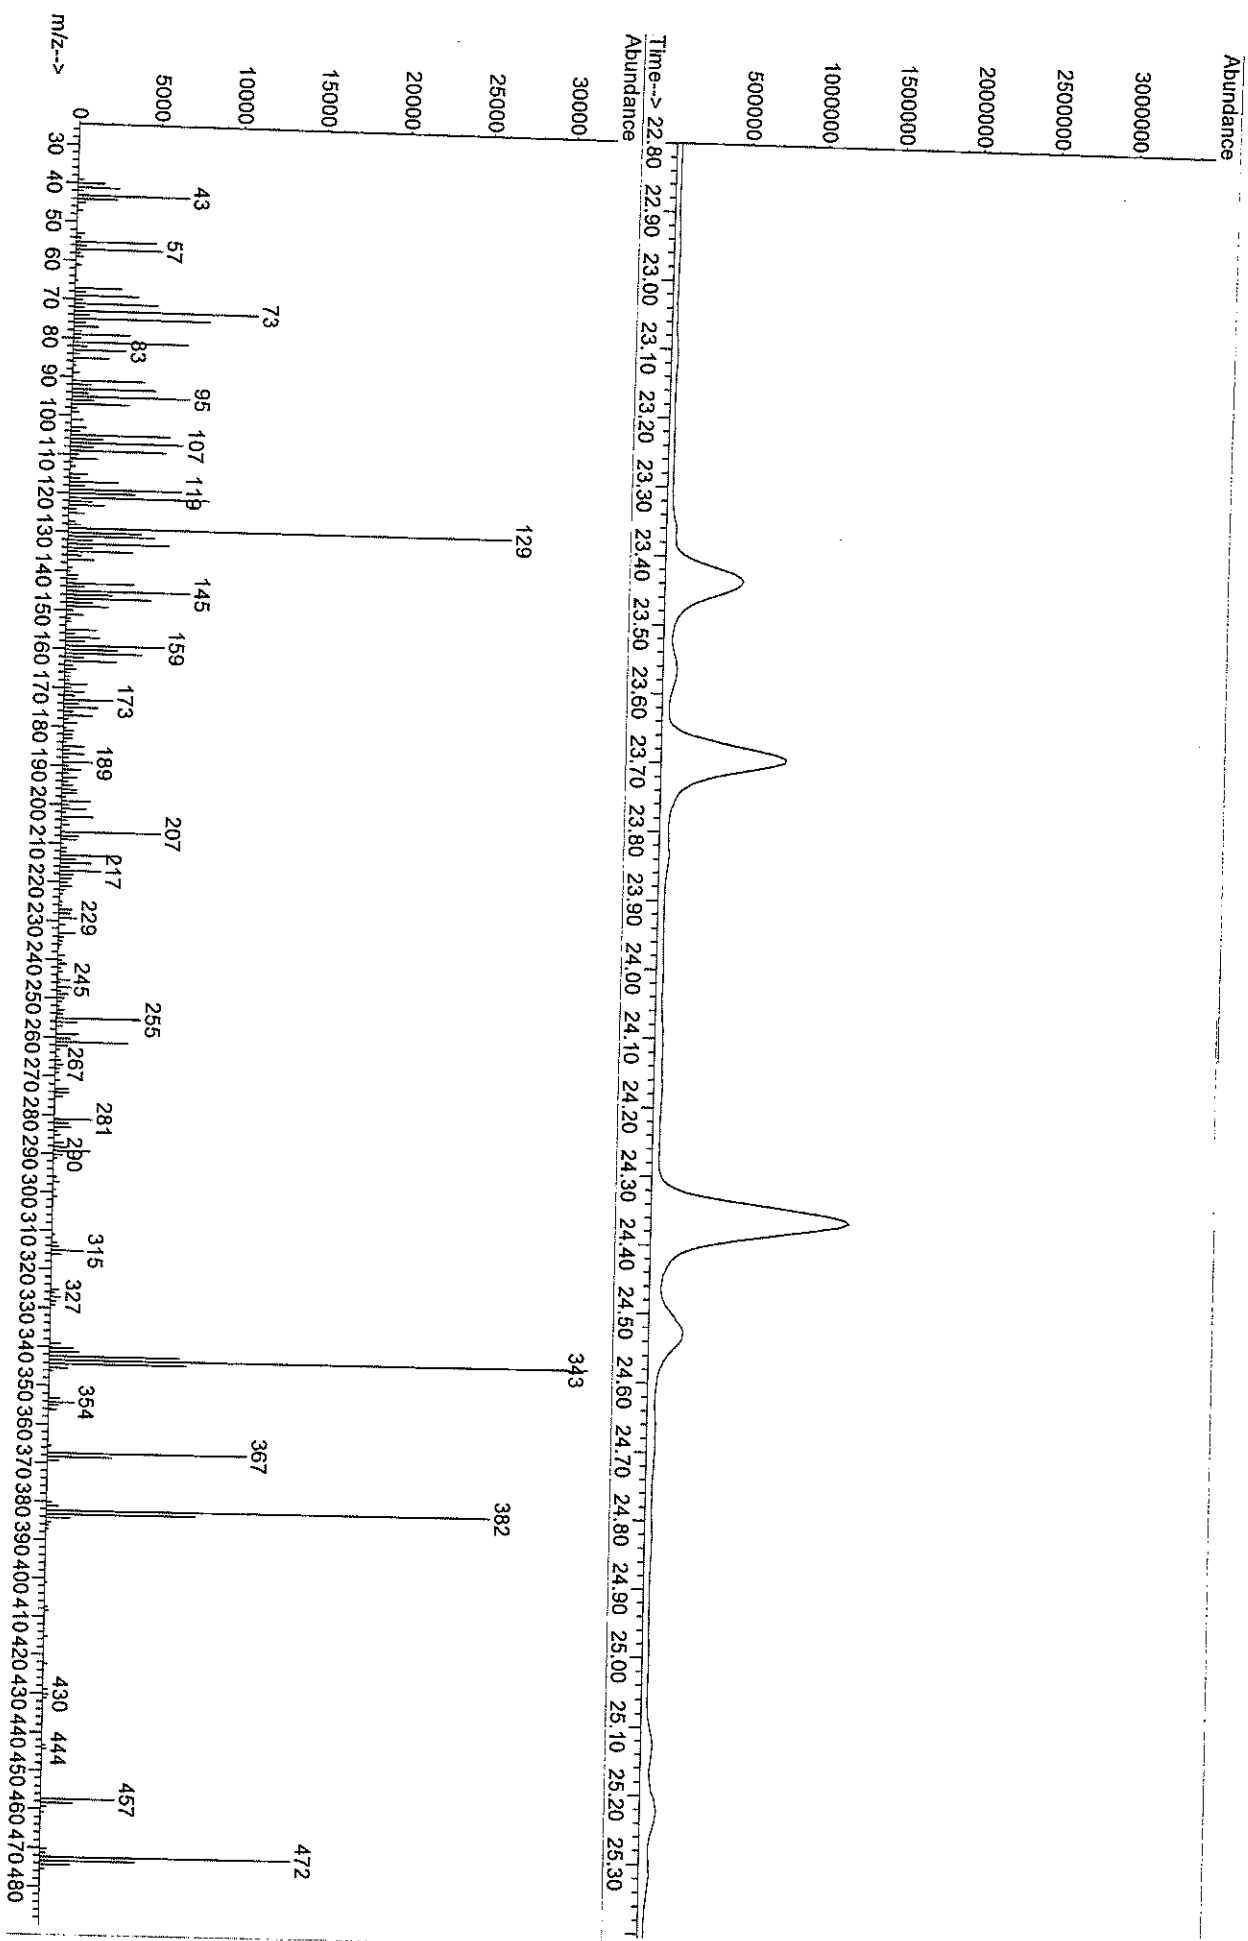

Supplement: s1 [file s1]
