# Supplementary material for: Phytosterol, Lipid and Phenolic Composition, and Biological Activities of Guava Seed Oil
Source: MDPI journal article supplement (doi:10.3390/molecules25112474), 2020-05-27
Supplement: s1 [file s1]

=====

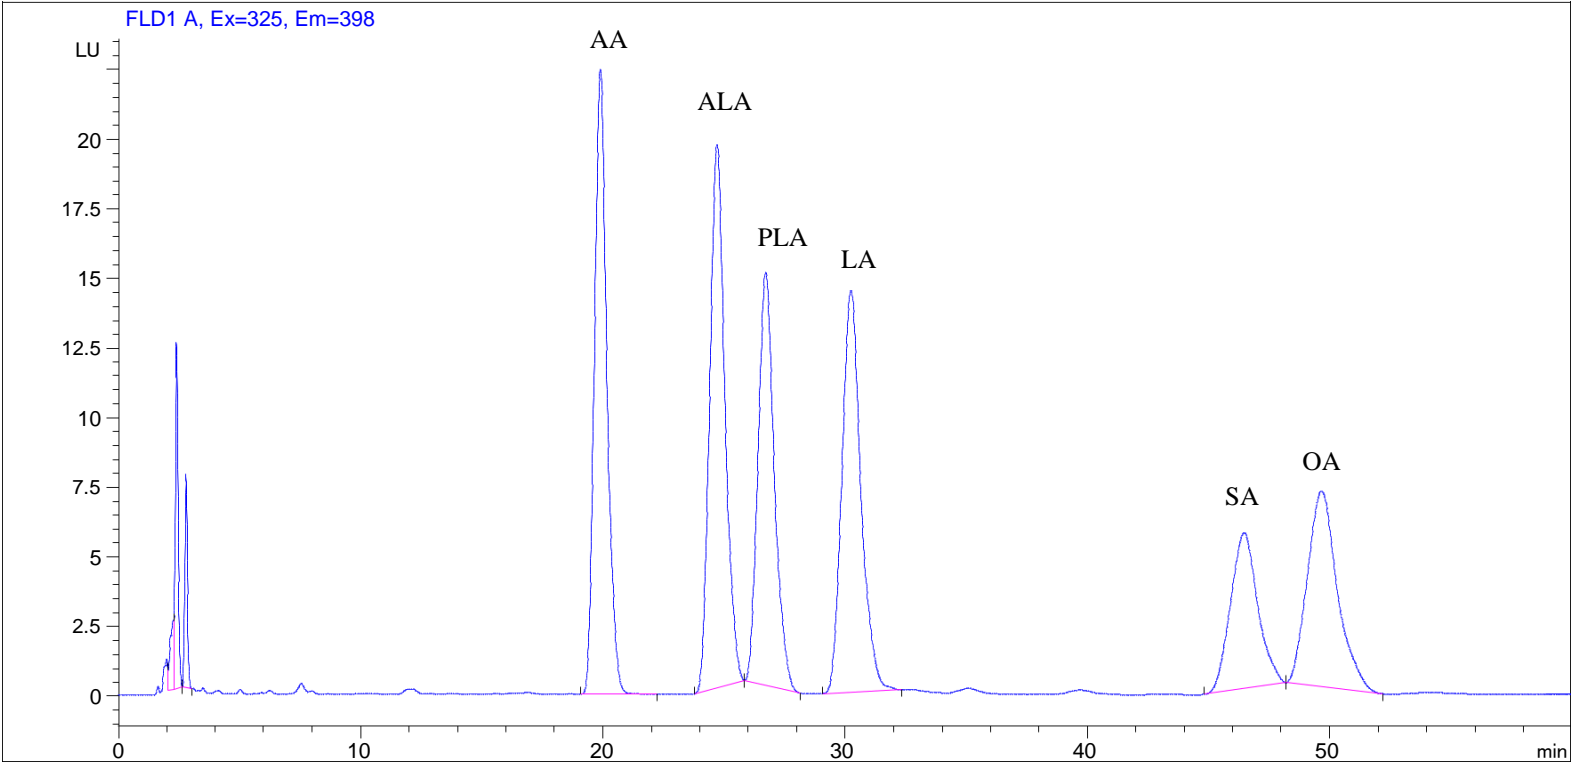

Sample Name: Mixed Std. 100 uM

| Peak # | RetTime [min] | Type | Width [min] | Area [LU*s] | Height [LU] | Area %  |
|--------|---------------|------|-------------|-------------|-------------|---------|
| 7      | 30.239        | BB   | 0.8289      | 784.64801   | 14.42857    | 17.9974 |
| 8      | 46.461        | BB   | 1.1585      | 437.15863   | 5.60415     | 10.0271 |
| 9      | 49.658        | BB   | 1.2552      | 603.83368   | 7.01252     | 13.8501 |

Totals : 4359.78820 106.38985

=====  
\*\*\* End of Report \*\*\*
