# Supplementary material for: Phytosterol, Lipid and Phenolic Composition, and Biological Activities of Guava Seed Oil
Source: MDPI journal article supplement (doi:10.3390/molecules25112474), 2020-05-27
Supplement: s1 [file s1]

# Target Compound Screening Report

|                               |                                                     |                                 |                                  |
|-------------------------------|-----------------------------------------------------|---------------------------------|----------------------------------|
| <b>Data File</b>              | guavaoil.d                                          | <b>Sample Name</b>              | guava seed oil                   |
| <b>Sample Type</b>            | Sample                                              | <b>Position</b>                 | P1-A2                            |
| <b>Instrument Name</b>        | Instrument 1                                        | <b>User Name</b>                |                                  |
| <b>Acq Method</b>             | Pesticides screening_20170825.m                     | <b>Acquired Time</b>            | 3/13/2020 3:03:59 PM (UTC+07:00) |
| <b>IRM Calibration Status</b> | All Ions Missed                                     | <b>DA Method</b>                | Pesticides_Screening_MFE.m       |
| <b>Comment</b>                |                                                     |                                 |                                  |
| <b>Sample Group</b>           |                                                     |                                 |                                  |
| <b>Stream Name</b>            | LC 1                                                | <b>Info.</b>                    |                                  |
| <b>Acquisition SW Version</b> | 6200 series TOF/6500 series Q-TOF B.08.00 (B8058.0) | <b>Acquisition Time (Local)</b> | 3/13/2020 3:03:59 PM (UTC+07:00) |
| <b>QTOF Firmware Version</b>  | 25.698                                              | <b>QTOF Driver Version</b>      | 8.00.00                          |
|                               |                                                     | <b>Tune Mass Range Max.</b>     | 3200                             |

## Compound Table

| Label                                                     | Tgt Name                        | Tgt Score | Mass Error (ppm) | Tgt Formula  | Obs. RT | Ref. Mass | Obs. Mass |
|-----------------------------------------------------------|---------------------------------|-----------|------------------|--------------|---------|-----------|-----------|
| Cpd 1: 4-hexyl-decanoic acid; C16 H32 O2; 0.576           | 4-hexyl-decanoic acid           | 96.14     | 3.86             | C16 H32 O2   | 0.576   | 256.2402  | 256.2412  |
| Cpd 7: C16 Sphinganine; C16 H35 N O2; 0.576               | C16 Sphinganine                 | 96.14     | 3.54             | C16 H35 N O2 | 0.576   | 273.2668  | 273.2677  |
| Cpd 2: 5S-HETE di-endoperoxide; C20 H34 O8; 1.051         | 5S-HETE di-endoperoxide         | 82.26     | 1.82             | C20 H34 O8   | 1.051   | 402.2254  | 402.2261  |
| Cpd 5: Didrovaltratum; C22 H32 O8; 1.051                  | Didrovaltratum                  | 89.23     | -3.36            | C22 H32 O8   | 1.051   | 424.2097  | 424.2083  |
| Cpd 9: Sphingofungin B; C20 H39 N O6; 1.066               | Sphingofungin B                 | 95.18     | 1.45             | C20 H39 N O6 | 1.066   | 389.2777  | 389.2783  |
| Cpd 3: 13,14-dihydro-19(R)-hydroxyPGE1; C20 H36 O6; 1.094 | 13,14-dihydro-19(R)-hydroxyPGE1 | 96.85     | 2.19             | C20 H36 O6   | 1.094   | 372.2512  | 372.252   |
| Cpd 6: Eschscholtzxanthin; C40 H54 O2; 1.177              | Eschscholtzxanthin              | 52.09     | -1.18            | C40 H54 O2   | 1.177   | 566.4124  | 566.4117  |
| Cpd 4: Tetradecan-3-one; C14 H28 O; 21.926                | Tetradecan-3-one                | 98.82     | 2.03             | C14 H28 O    | 21.926  | 212.214   | 212.2144  |
| Cpd 8: Xestoaminol C; C14 H31 N O; 21.926                 | Xestoaminol C                   | 98.82     | 1.88             | C14 H31 N O  | 21.926  | 229.2406  | 229.241   |

| Name                  | Obs. m/z | Obs. RT | Obs. Mass | Tgt Formula | Tgt Mass | Tgt Mass Error (ppm) | Find Cpds Algorithm |
|-----------------------|----------|---------|-----------|-------------|----------|----------------------|---------------------|
| 4-hexyl-decanoic acid | 274.2751 | 0.576   | 256.2412  | C16 H32 O2  | 256.2402 | 3.86                 | Find by Formula     |

## Compound Chromatograms

# Target Compound Screening Report

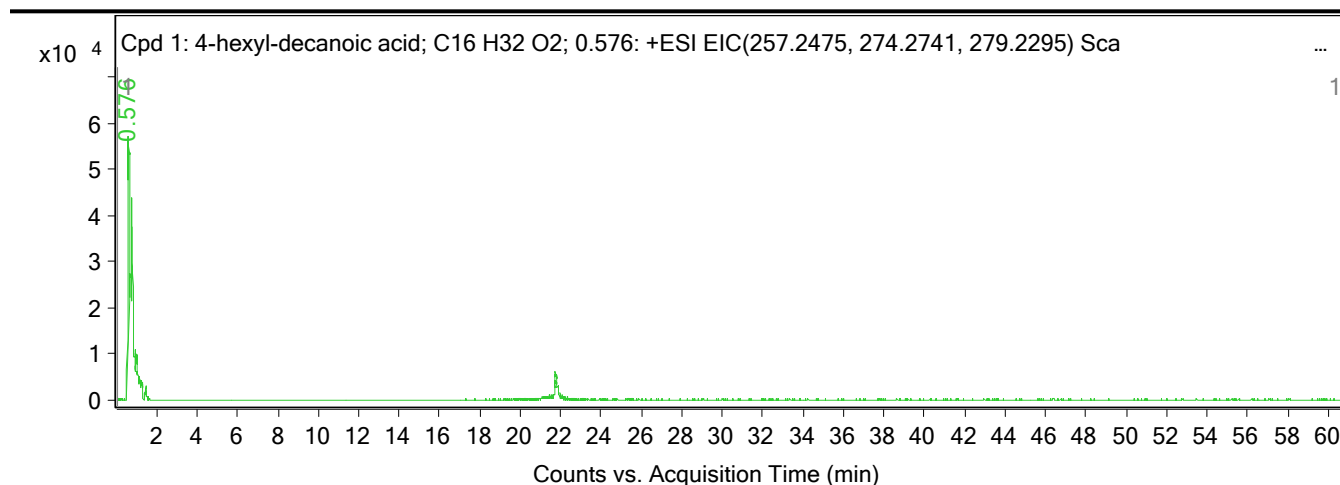

## MS Zoomed Spectrum

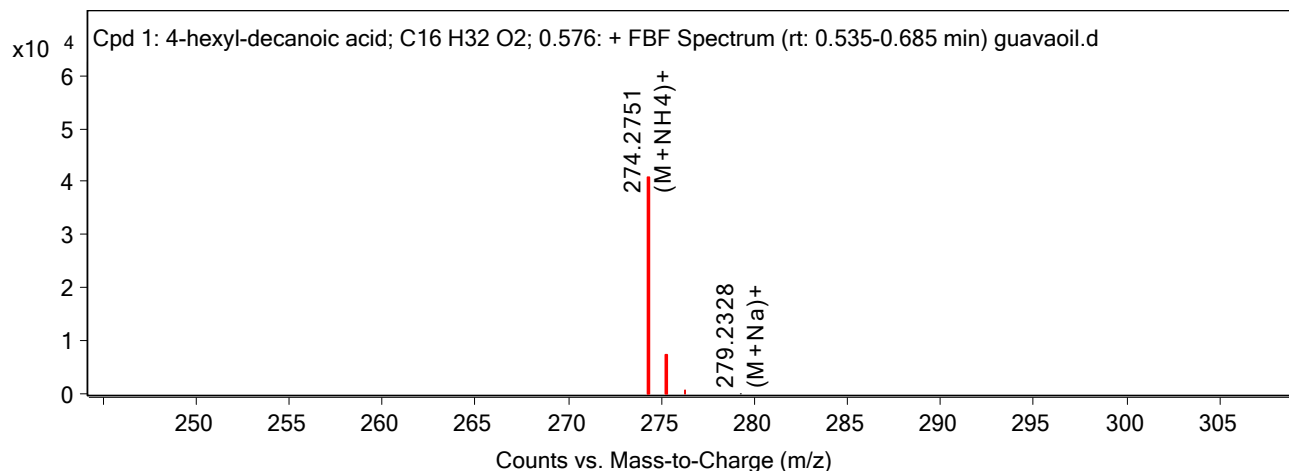

## MS Spectrum Peak List

| Obs. m/z | Charge | Abund    | Ion/Isotope                       |
|----------|--------|----------|-----------------------------------|
| 274.2751 | 1      | 40796.12 | (M+NH <sub>4</sub> ) <sup>+</sup> |
| 275.2782 | 1      | 6979.9   | (M+NH <sub>4</sub> ) <sup>+</sup> |
| 276.2812 | 1      | 707.75   | (M+NH <sub>4</sub> ) <sup>+</sup> |
| 279.2328 | 1      | 153.3    | (M+Na) <sup>+</sup>               |

## MS Zoomed Spectrum

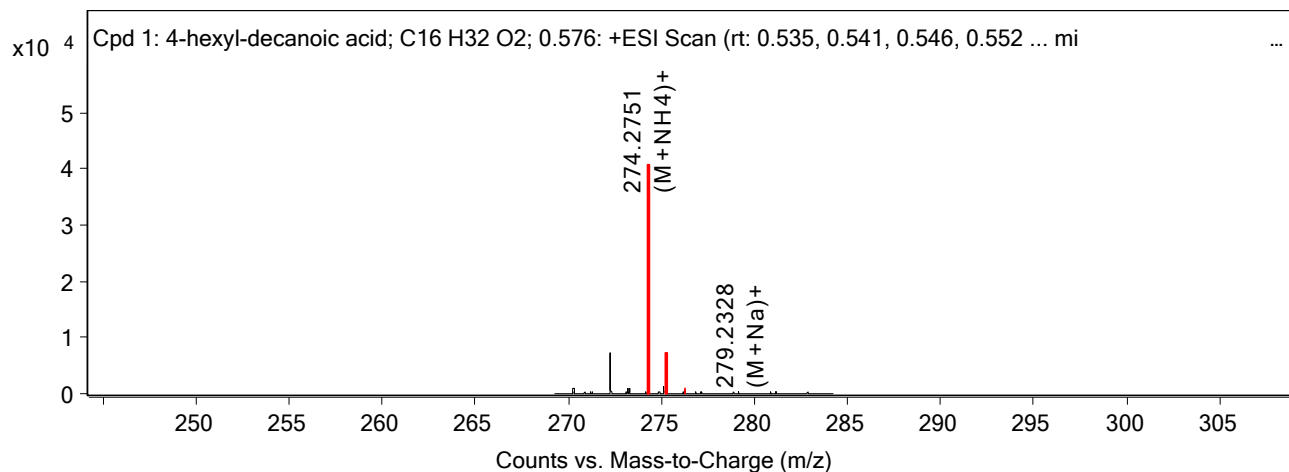

## MS Spectrum Peak List

| Obs. m/z | Charge | Abund | Ion/Isotope | Tgt Mass Error (ppm) |
|----------|--------|-------|-------------|----------------------|
|----------|--------|-------|-------------|----------------------|

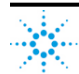

# Target Compound Screening Report

|          |   |          |                                   |        |
|----------|---|----------|-----------------------------------|--------|
| 274.2751 |   | 40791.44 |                                   | -3.67  |
| 274.2751 | 1 | 40796.12 | (M+NH <sub>4</sub> ) <sup>+</sup> | -3.67  |
| 275.2782 | 1 | 6979.9   | (M+NH <sub>4</sub> ) <sup>+</sup> | -2.99  |
| 276.2812 | 1 | 707.75   | (M+NH <sub>4</sub> ) <sup>+</sup> | -3.85  |
| 279.2328 | 1 | 153.3    | (M+Na) <sup>+</sup>               | -11.86 |

| Name            | Obs. m/z | Obs. RT | Obs. Mass | Tgt Formula  | Tgt Mass | Tgt Mass Error (ppm) | Find Cpds Algorithm |
|-----------------|----------|---------|-----------|--------------|----------|----------------------|---------------------|
| C16 Sphinganine | 274.2751 | 0.576   | 273.2677  | C16 H35 N O2 | 273.2668 | 3.54                 | Find by Formula     |

## Compound Chromatograms

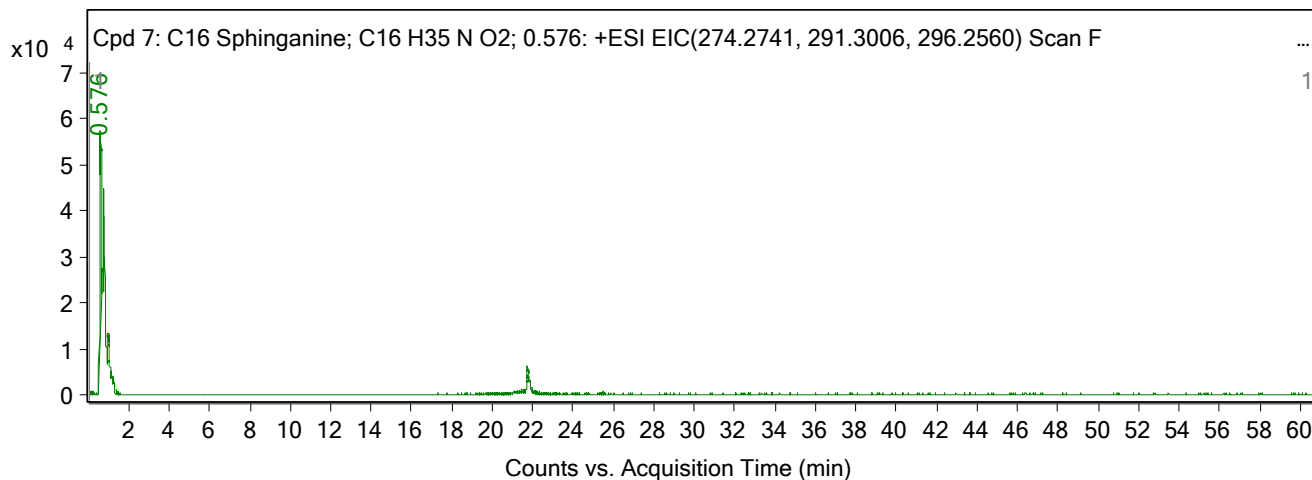

## MS Zoomed Spectrum

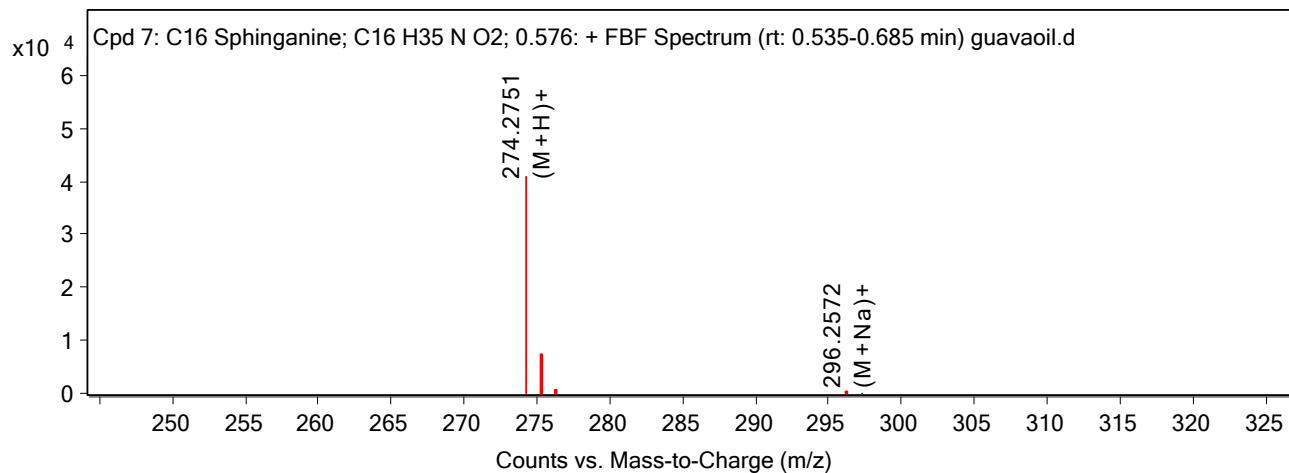

## MS Spectrum Peak List

| Obs. m/z | Charge | Abund    | Ion/Isotope         |
|----------|--------|----------|---------------------|
| 274.2751 | 1      | 40796.12 | (M+H) <sup>+</sup>  |
| 275.2782 | 1      | 6979.9   | (M+H) <sup>+</sup>  |
| 276.2812 | 1      | 707.75   | (M+H) <sup>+</sup>  |
| 296.2572 | 1      | 325.45   | (M+Na) <sup>+</sup> |
| 297.249  | 1      | 70.74    | (M+Na) <sup>+</sup> |

## MS Zoomed Spectrum

# Target Compound Screening Report

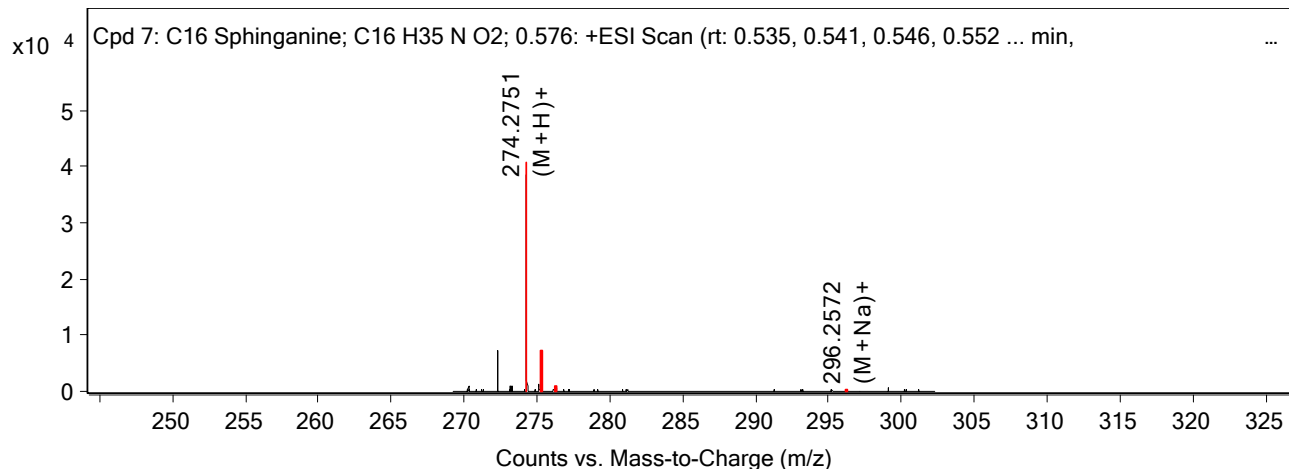

## MS Spectrum Peak List

| Obs. m/z | Charge | Abund    | Ion/Isotope | Tgt Mass Error (ppm) |
|----------|--------|----------|-------------|----------------------|
| 274.2751 |        | 40791.44 |             |                      |
| 274.2751 | 1      | 40796.12 | (M+H)+      | -3.67                |
| 275.2782 | 1      | 6979.9   | (M+H)+      | -2.99                |
| 276.2812 | 1      | 707.75   | (M+H)+      | -3.85                |
| 296.2572 | 1      | 325.45   | (M+Na)+     | -4.05                |
| 297.249  | 1      | 70.74    | (M+Na)+     | 34.63                |

| Name                    | Obs. m/z | Obs. RT | Obs. Mass | Tgt Formula | Tgt Mass | Tgt Mass Error (ppm) | Find Cpds Algorithm |
|-------------------------|----------|---------|-----------|-------------|----------|----------------------|---------------------|
| 5S-HETE di-endoperoxide | 425.2153 | 1.051   | 402.2261  | C20 H34 O8  | 402.2254 | 1.82                 | Find by Formula     |

## Compound Chromatograms

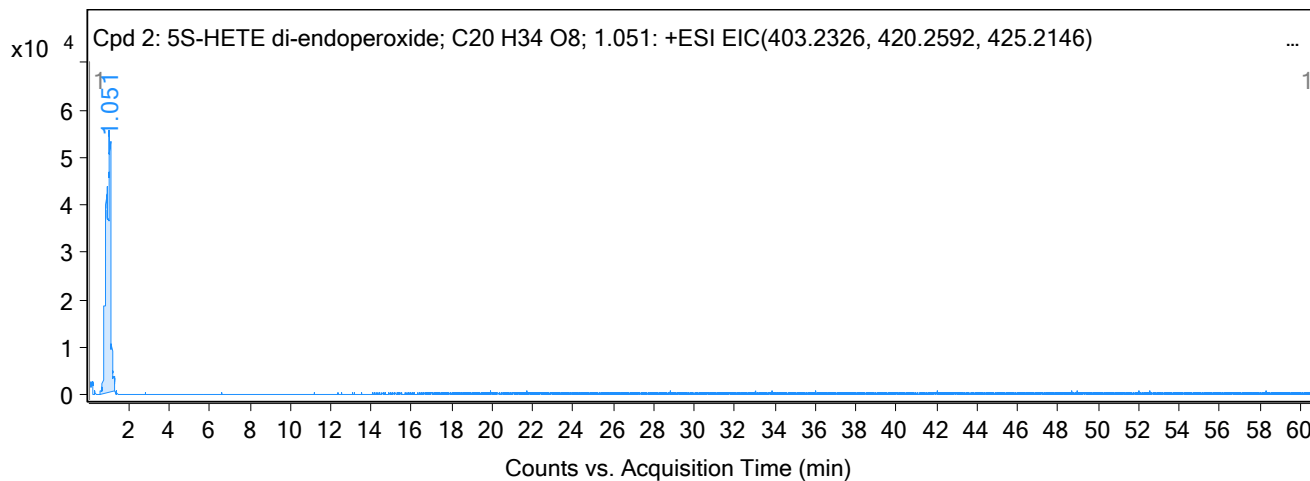

## MS Zoomed Spectrum

# Target Compound Screening Report

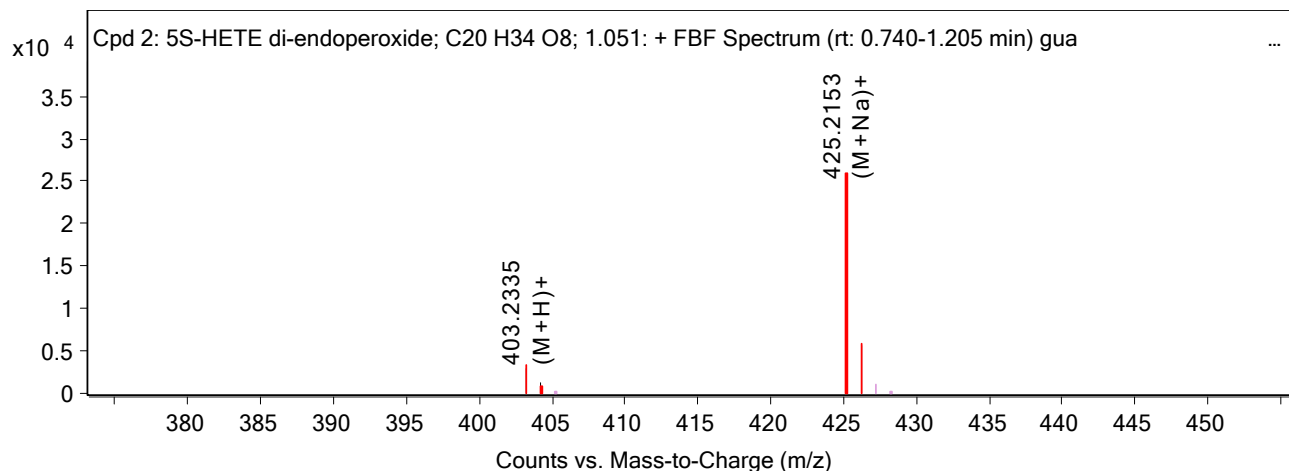

## MS Spectrum Peak List

| Obs. m/z | Charge | Abund    | Ion/Isotope |
|----------|--------|----------|-------------|
| 403.2335 | 1      | 2864.07  | (M+H)+      |
| 404.2393 | 1      | 1186.12  | (M+H)+      |
| 425.2153 | 1      | 25849.69 | (M+Na)+     |
| 426.2184 | 1      | 5663.76  | (M+Na)+     |

## MS Zoomed Spectrum

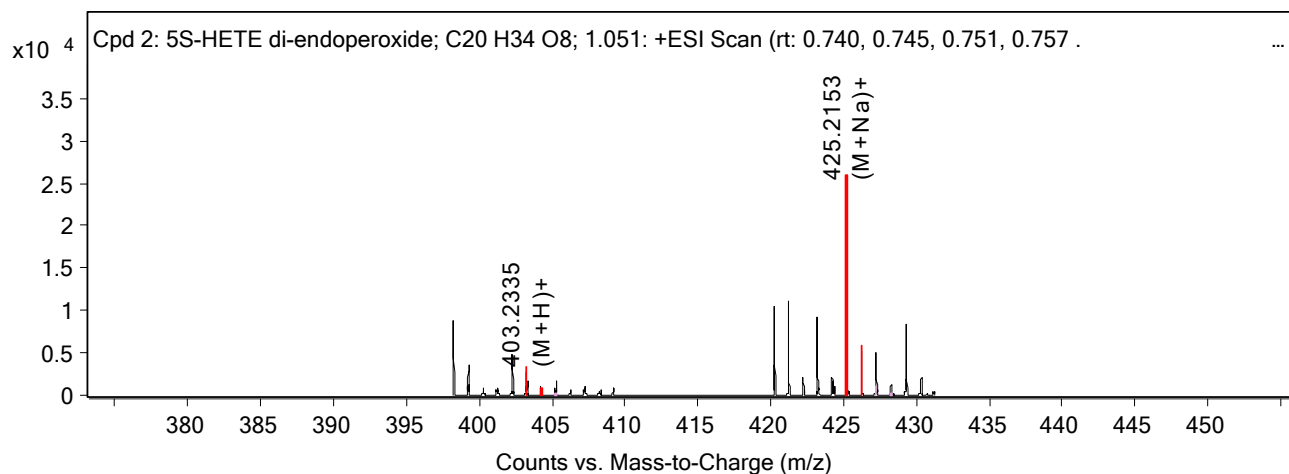

## MS Spectrum Peak List

| Obs. m/z | Charge | Abund    | Ion/Isotope | Tgt Mass Error (ppm) |
|----------|--------|----------|-------------|----------------------|
| 403.2335 | 1      | 2864.07  | (M+H)+      | -2.03                |
| 404.2393 | 1      | 1186.12  | (M+H)+      | -8.01                |
| 425.2153 | 1      | 25849.69 | (M+Na)+     | -1.62                |
| 425.2153 |        | 25841.95 |             |                      |
| 426.2184 | 1      | 5663.76  | (M+Na)+     | -0.81                |

| Name           | Obs. m/z | Obs. RT | Obs. Mass | Tgt Formula                                    | Tgt Mass | Tgt Mass Error (ppm) | Find Cpd Algorithm |
|----------------|----------|---------|-----------|------------------------------------------------|----------|----------------------|--------------------|
| Didrovaltratum | 425.2156 | 1.051   | 424.2083  | C <sub>22</sub> H <sub>32</sub> O <sub>8</sub> | 424.2097 | -3.36                | Find by Formula    |

## Compound Chromatograms

# Target Compound Screening Report

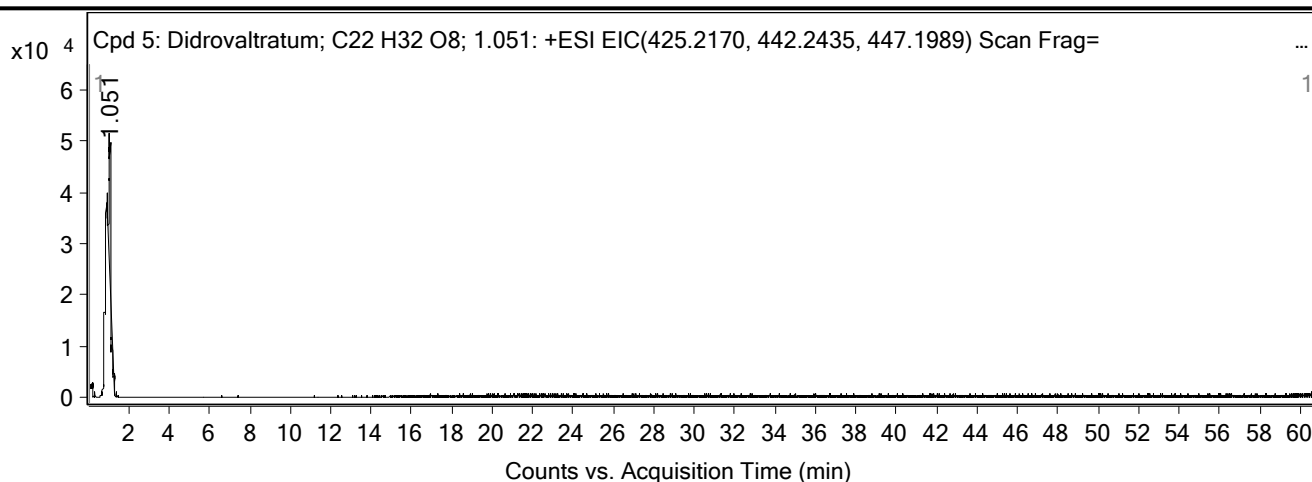

## MS Zoomed Spectrum

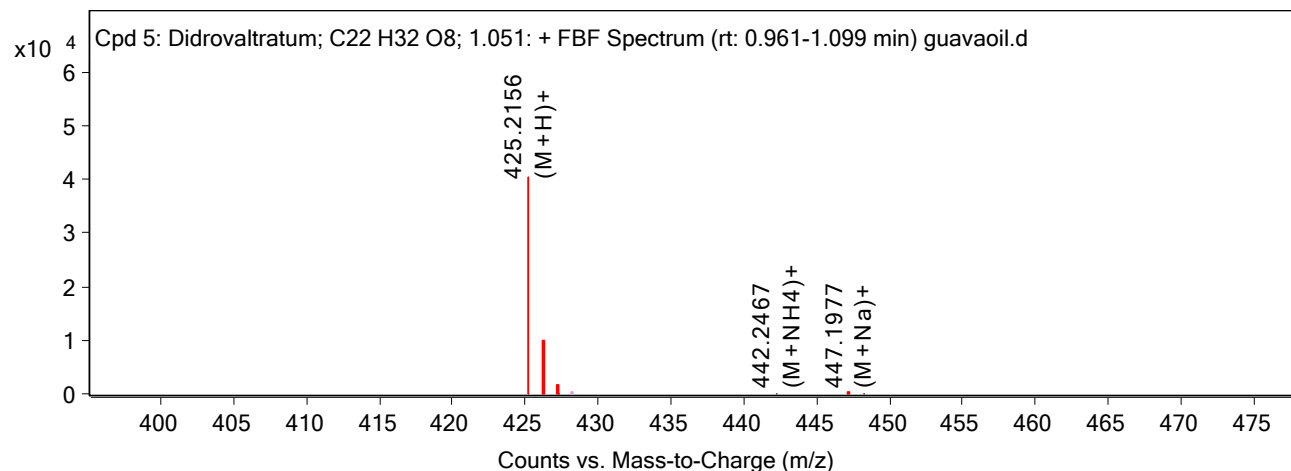

## MS Spectrum Peak List

| Obs. m/z | Charge | Abund    | Ion/Isotope |
|----------|--------|----------|-------------|
| 425.2156 | 1      | 40296.68 | (M+H)+      |
| 426.2187 | 1      | 8606.83  | (M+H)+      |
| 427.2216 | 1      | 91.42    | (M+H)+      |
| 442.2467 | 1      | 92.27    | (M+NH4)+    |
| 447.1977 | 1      | 226.13   | (M+Na)+     |
| 448.2011 | 1      | 48.77    | (M+Na)+     |

## MS Zoomed Spectrum

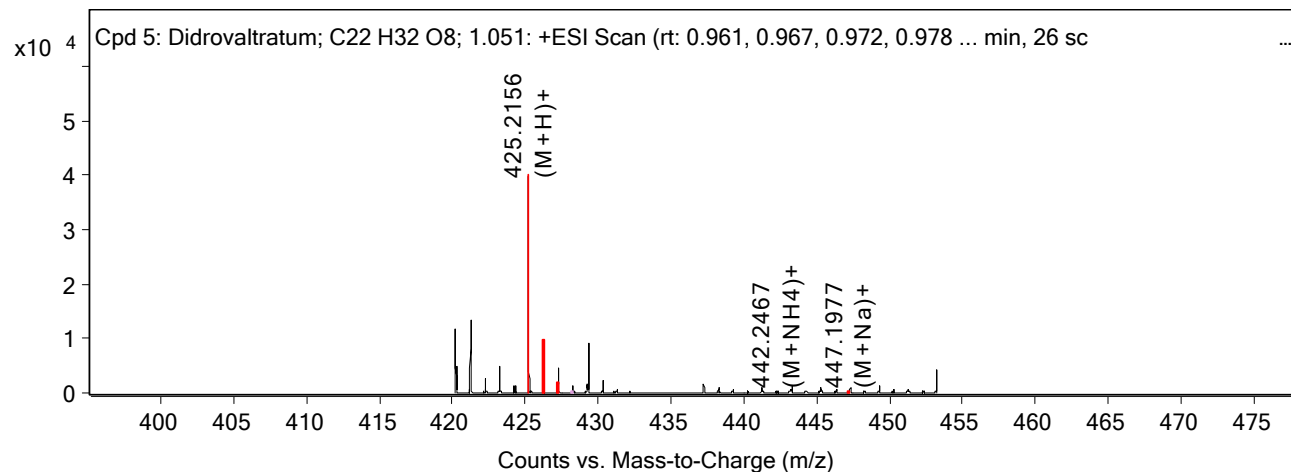

# Target Compound Screening Report

## MS Spectrum Peak List

| Obs. m/z | Charge | Abund    | Ion/Isotope | Tgt Mass Error (ppm) |
|----------|--------|----------|-------------|----------------------|
| 425.2156 | 1      | 40296.68 | (M+H)+      | 3.24                 |
| 425.2156 |        | 40290.14 |             |                      |
| 426.2187 | 1      | 8606.83  | (M+H)+      | 3.99                 |
| 427.2216 | 1      | 91.42    | (M+H)+      | 2.93                 |
| 442.2467 | 1      | 92.27    | (M+NH4)+    | -7.22                |
| 447.1977 | 1      | 226.13   | (M+Na)+     | 2.82                 |
| 448.2011 | 1      | 48.77    | (M+Na)+     | 2.79                 |

| Name            | Obs. m/z | Obs. RT | Obs. Mass | Tgt Formula  | Tgt Mass | Tgt Mass Error (ppm) | Find Cpds Algorithm |
|-----------------|----------|---------|-----------|--------------|----------|----------------------|---------------------|
| Sphingofungin B | 390.2858 | 1.066   | 389.2783  | C20 H39 N O6 | 389.2777 | 1.45                 | Find by Formula     |

## Compound Chromatograms

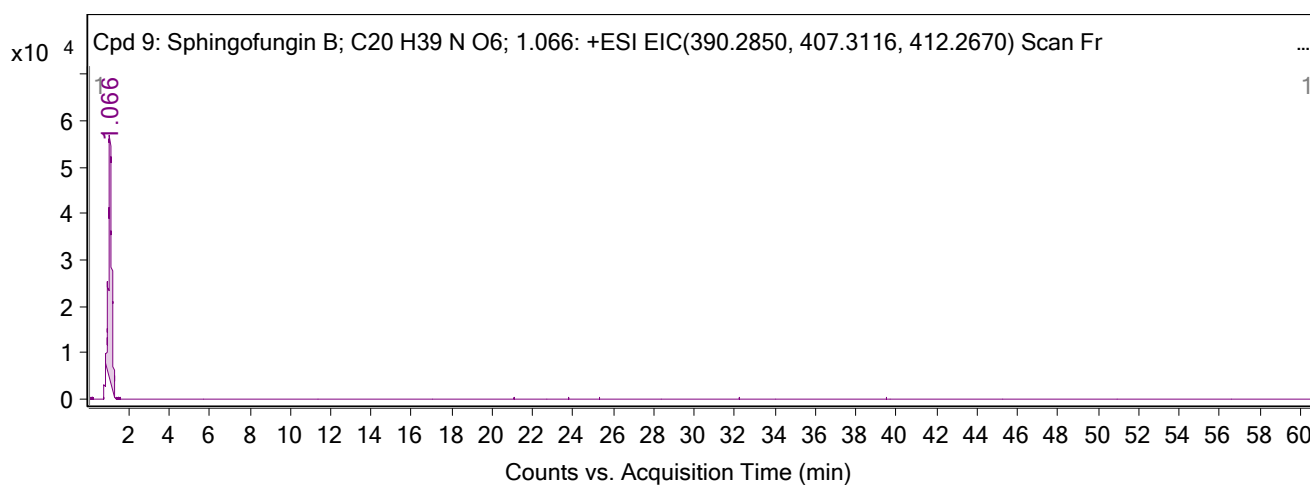

## MS Zoomed Spectrum

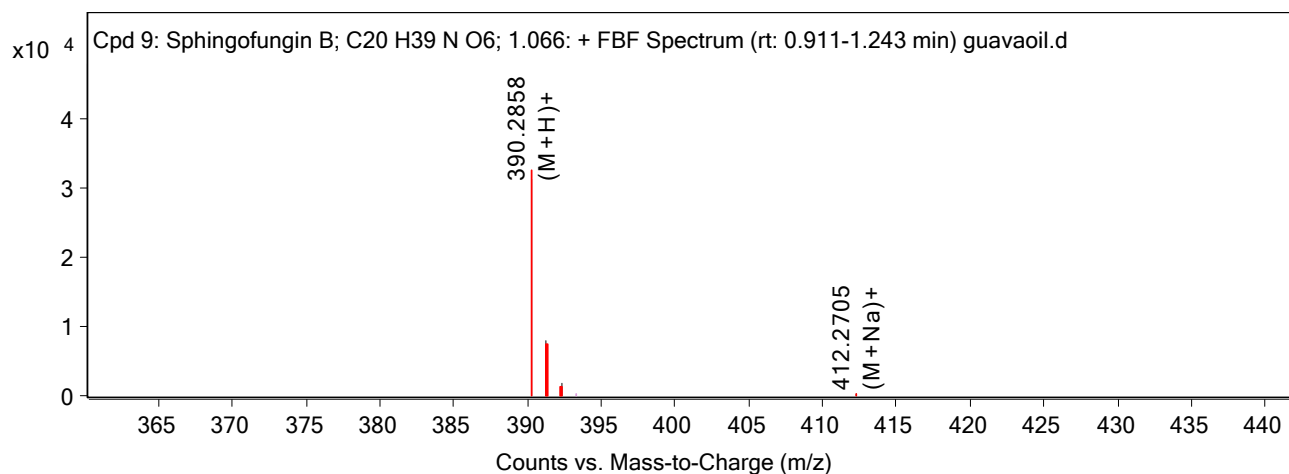

## MS Spectrum Peak List

| Obs. m/z | Charge | Abund    | Ion/Isotope |
|----------|--------|----------|-------------|
| 390.2858 | 1      | 31257.39 | (M+H)+      |
| 391.288  | 1      | 8067.59  | (M+H)+      |
| 392.2908 | 1      | 1817.55  | (M+H)+      |
| 412.2705 | 1      | 171.49   | (M+Na)+     |

## MS Zoomed Spectrum

# Target Compound Screening Report

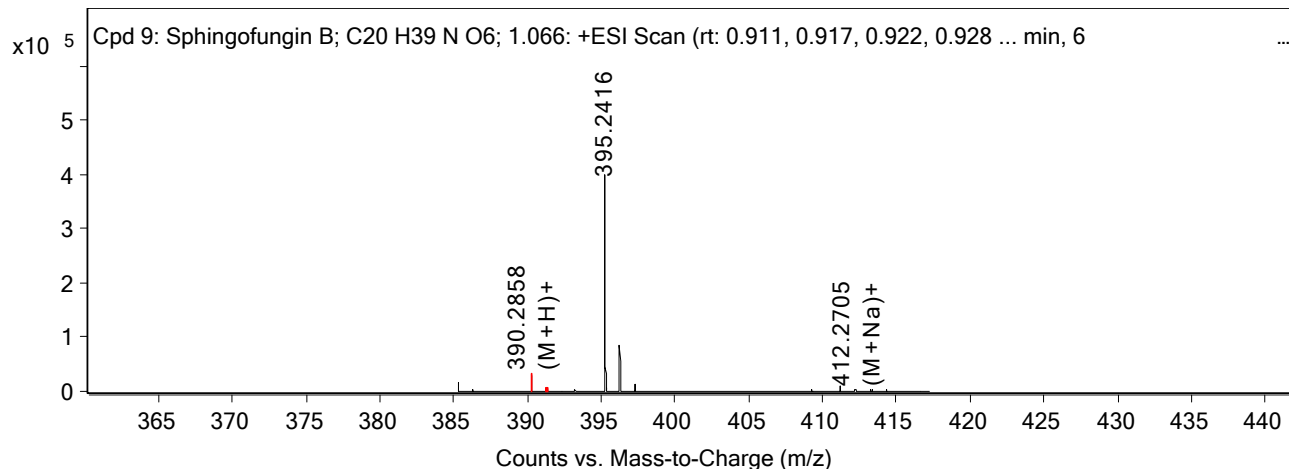

## MS Spectrum Peak List

| Obs. m/z | Charge | Abund     | Ion/Isotope | Tgt Mass Error (ppm) |
|----------|--------|-----------|-------------|----------------------|
| 390.2858 | 1      | 31257.39  | (M+H)+      | -2.07                |
| 391.288  | 1      | 8067.59   | (M+H)+      | 0.78                 |
| 392.2908 | 1      | 1817.55   | (M+H)+      | 0.13                 |
| 395.2416 |        | 409137.32 |             |                      |
| 412.2705 | 1      | 171.49    | (M+Na)+     | -8.68                |

| Name                            | Obs. m/z | Obs. RT | Obs. Mass | Tgt Formula                                    | Tgt Mass | Tgt Mass Error (ppm) | Find Cpd Algorithm |
|---------------------------------|----------|---------|-----------|------------------------------------------------|----------|----------------------|--------------------|
| 13,14-dihydro-19(R)-hydroxyPGE1 | 395.2415 | 1.094   | 372.252   | C <sub>20</sub> H <sub>36</sub> O <sub>6</sub> | 372.2512 | 2.19                 | Find by Formula    |

## Compound Chromatograms

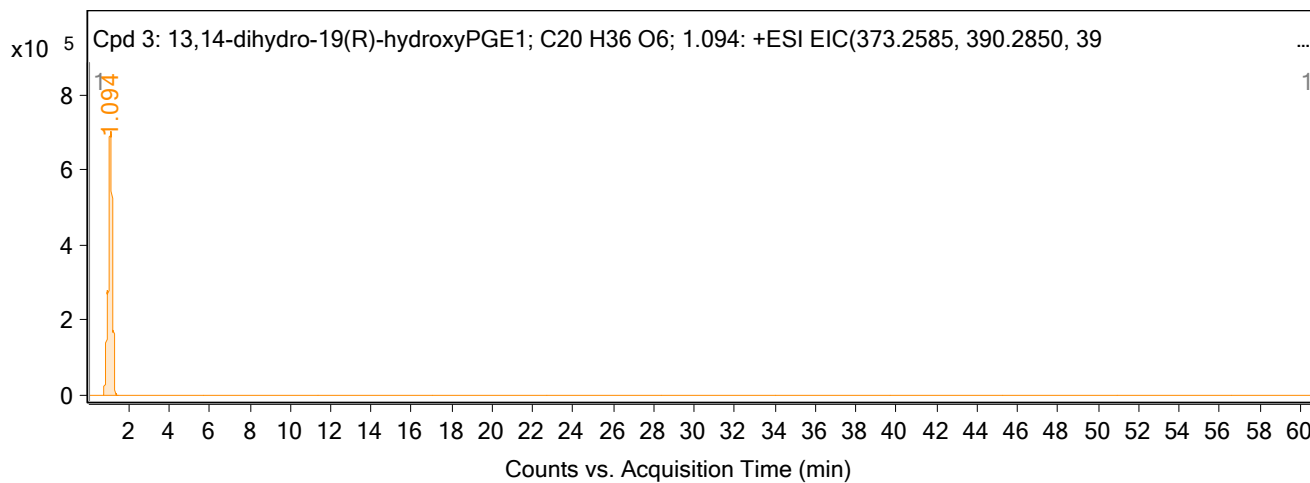

MS Zoomed Spectrum



# Target Compound Screening Report

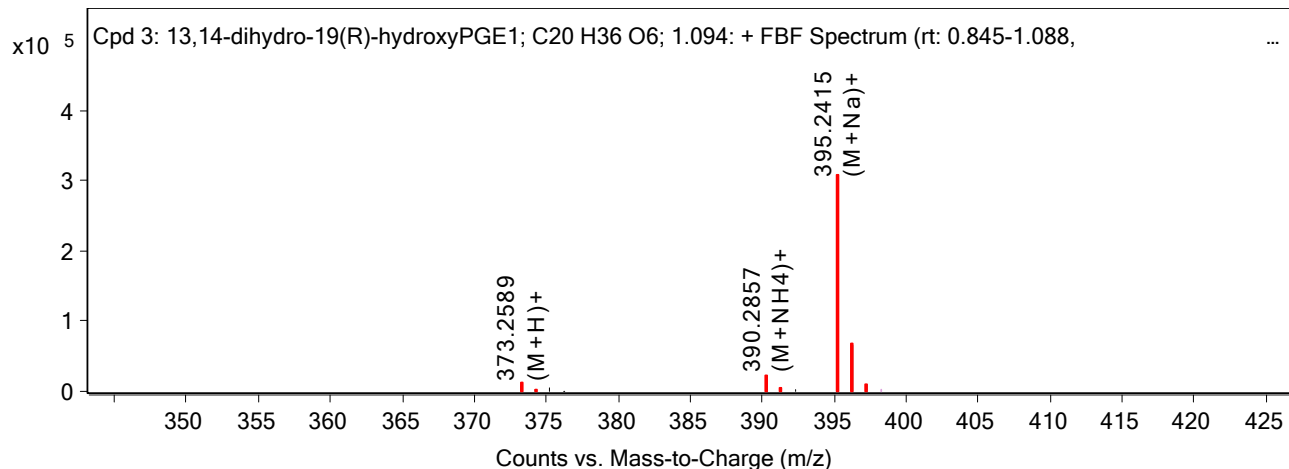

## MS Spectrum Peak List

| Obs. m/z | Charge | Abund     | Ion/Isotope |
|----------|--------|-----------|-------------|
| 373.2589 | 1      | 8921.8    | (M+H)+      |
| 374.2622 | 1      | 1950.85   | (M+H)+      |
| 375.2514 | 1      | 4412.21   | (M+H)+      |
| 376.2545 | 1      | 1115.43   | (M+H)+      |
| 390.2857 | 1      | 22566.39  | (M+NH4)+    |
| 391.2877 | 1      | 6238.88   | (M+NH4)+    |
| 392.2905 | 1      | 1453.82   | (M+NH4)+    |
| 395.2415 | 1      | 308023.94 | (M+Na)+     |
| 396.2448 | 1      | 66137.84  | (M+Na)+     |
| 397.247  | 1      | 10238.69  | (M+Na)+     |

## MS Zoomed Spectrum

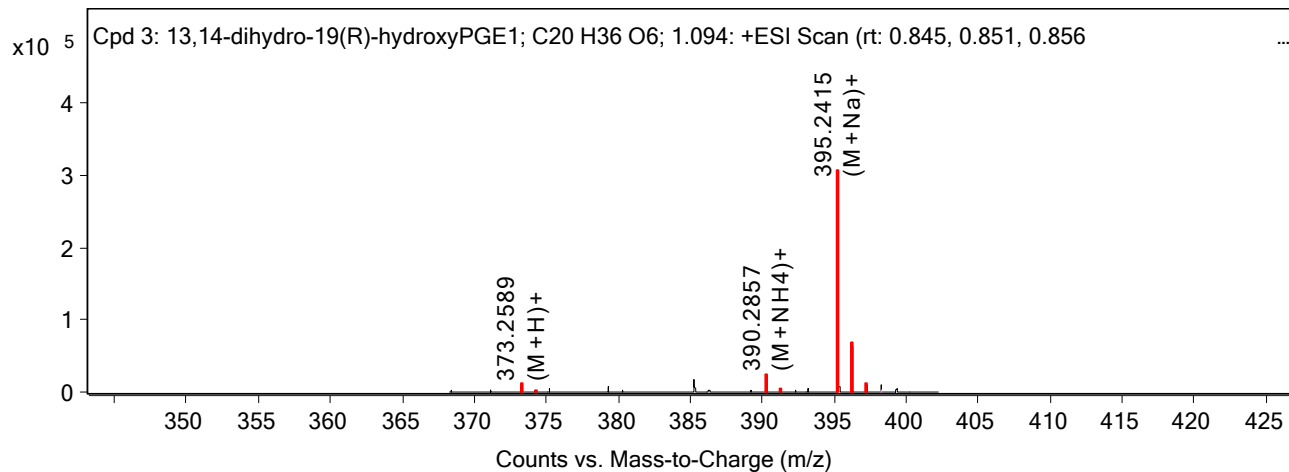

## MS Spectrum Peak List

| Obs. m/z | Charge | Abund     | Ion/Isotope | Tgt Mass Error (ppm) |
|----------|--------|-----------|-------------|----------------------|
| 373.2589 | 1      | 8921.8    | (M+H)+      | -1.07                |
| 374.2622 | 1      | 1950.85   | (M+H)+      | -0.93                |
| 375.2514 | 1      | 4412.21   | (M+H)+      | 34.7                 |
| 376.2545 | 1      | 1115.43   | (M+H)+      | 33.52                |
| 390.2857 | 1      | 22566.39  | (M+NH4)+    | -1.76                |
| 391.2877 | 1      | 6238.88   | (M+NH4)+    | 1.66                 |
| 392.2905 | 1      | 1453.82   | (M+NH4)+    | 0.86                 |
| 395.2415 | 1      | 308023.94 | (M+Na)+     | -2.8                 |
| 396.2448 | 1      | 66137.84  | (M+Na)+     | -2.34                |
| 397.247  | 1      | 10238.69  | (M+Na)+     | -1.58                |

| Name | Obs. m/z | Obs. RT | Obs. Mass | Tgt Formula | Tgt Mass | Tgt Mass Error (ppm) | Find Cpd Algorithm |
|------|----------|---------|-----------|-------------|----------|----------------------|--------------------|
|------|----------|---------|-----------|-------------|----------|----------------------|--------------------|



# Target Compound Screening Report

|                    |          |       |          |            |          |       |                 |
|--------------------|----------|-------|----------|------------|----------|-------|-----------------|
| Eschscholtzxanthin | 567.4231 | 1.177 | 566.4117 | C40 H54 O2 | 566.4124 | -1.18 | Find by Formula |
|--------------------|----------|-------|----------|------------|----------|-------|-----------------|

## Compound Chromatograms

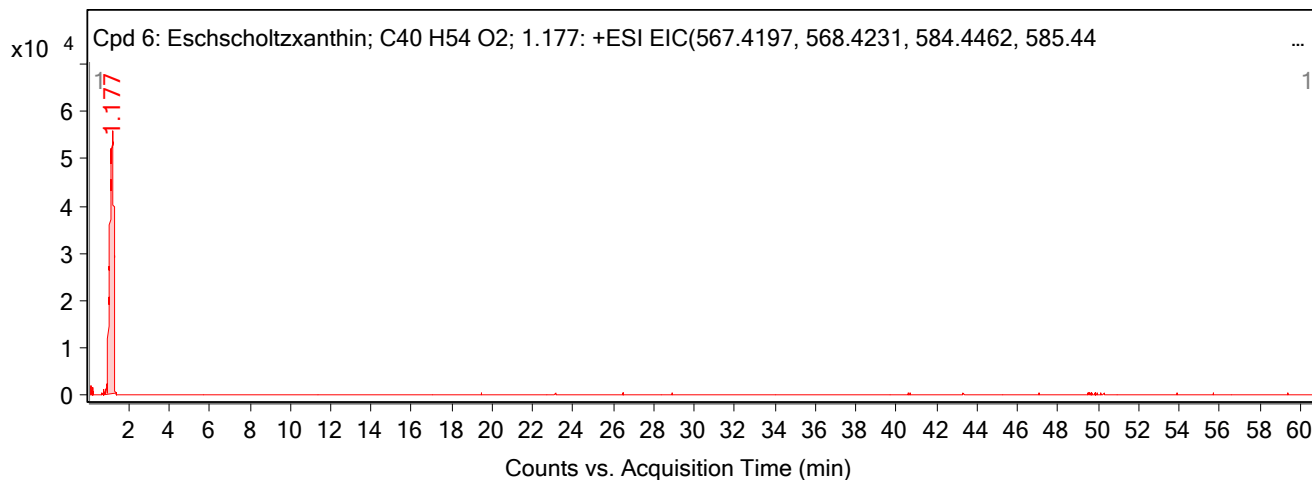

## MS Zoomed Spectrum

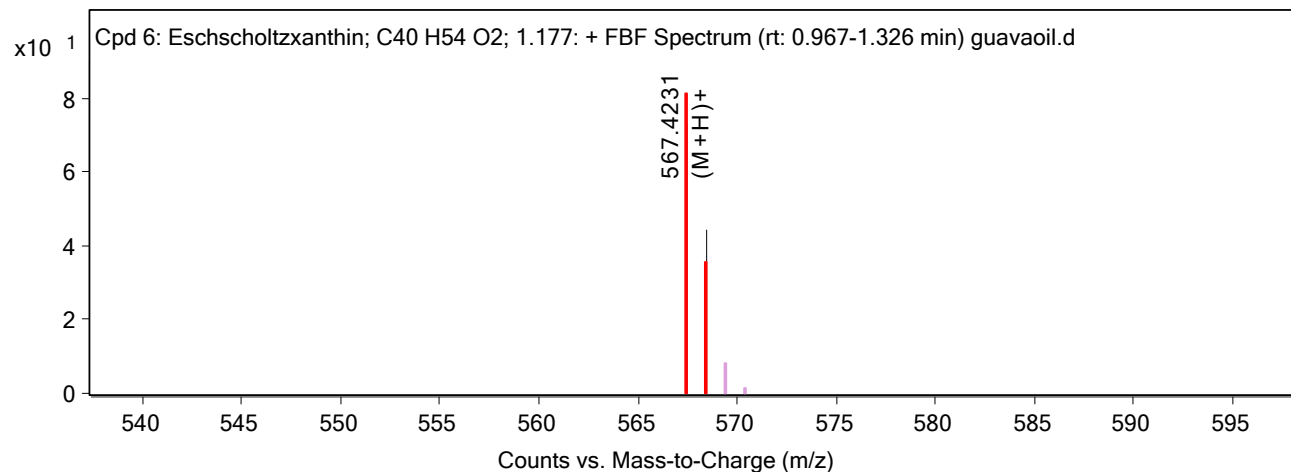

## MS Spectrum Peak List

| Obs. m/z | Charge | Abund | Ion/Isotope |
|----------|--------|-------|-------------|
| 567.4231 | 1      | 72.73 | (M+H)+      |
| 568.4157 | 1      | 44.55 | (M+H)+      |

## MS Zoomed Spectrum

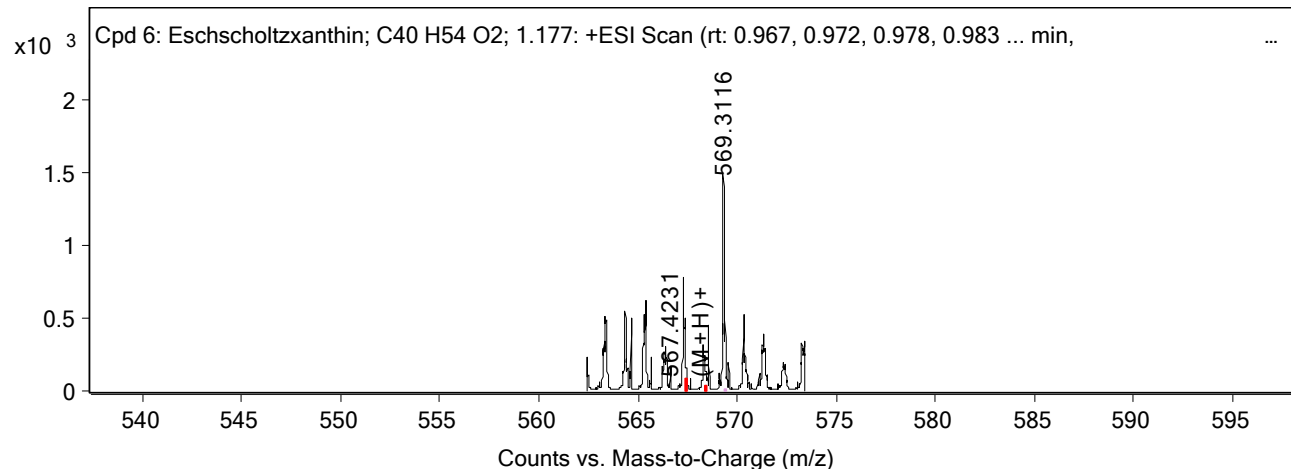

# Target Compound Screening Report

## MS Spectrum Peak List

| Obs. m/z | Charge | Abund   | Ion/Isotope | Tgt Mass Error (ppm) |
|----------|--------|---------|-------------|----------------------|
| 567.4231 | 1      | 72.73   | (M+H)+      | -6.08                |
| 568.4157 | 1      | 44.55   | (M+H)+      | 12.99                |
| 569.3116 |        | 1542.45 |             |                      |

| Name             | Obs. m/z | Obs. RT | Obs. Mass | Tgt Formula | Tgt Mass | Tgt Mass Error (ppm) | Find Cpds Algorithm |
|------------------|----------|---------|-----------|-------------|----------|----------------------|---------------------|
| Tetradecan-3-one | 230.2483 | 21.926  | 212.2144  | C14 H28 O   | 212.214  | 2.03                 | Find by Formula     |

## Compound Chromatograms

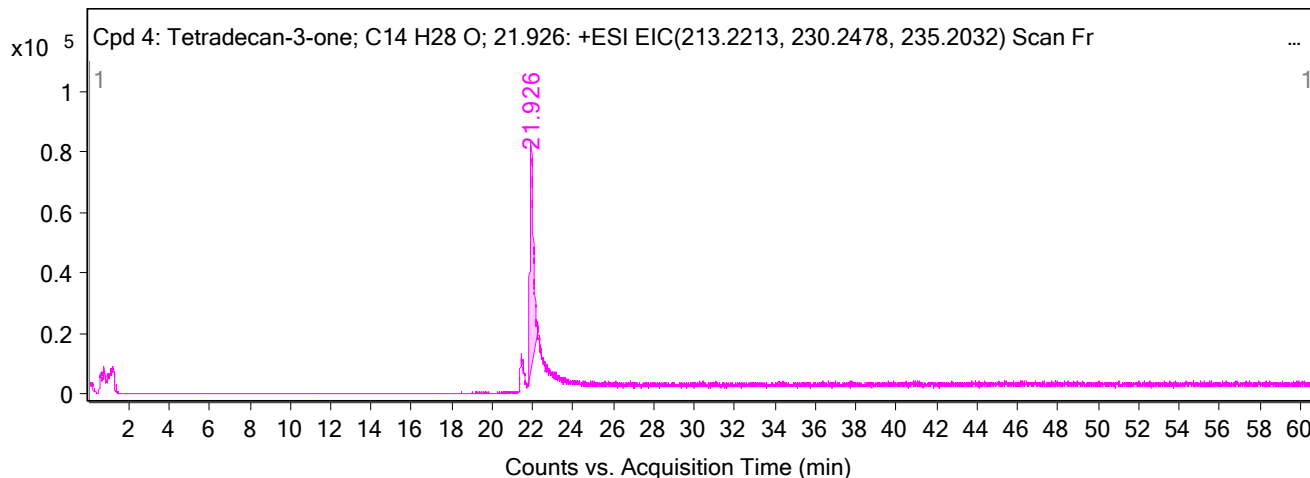

## MS Zoomed Spectrum

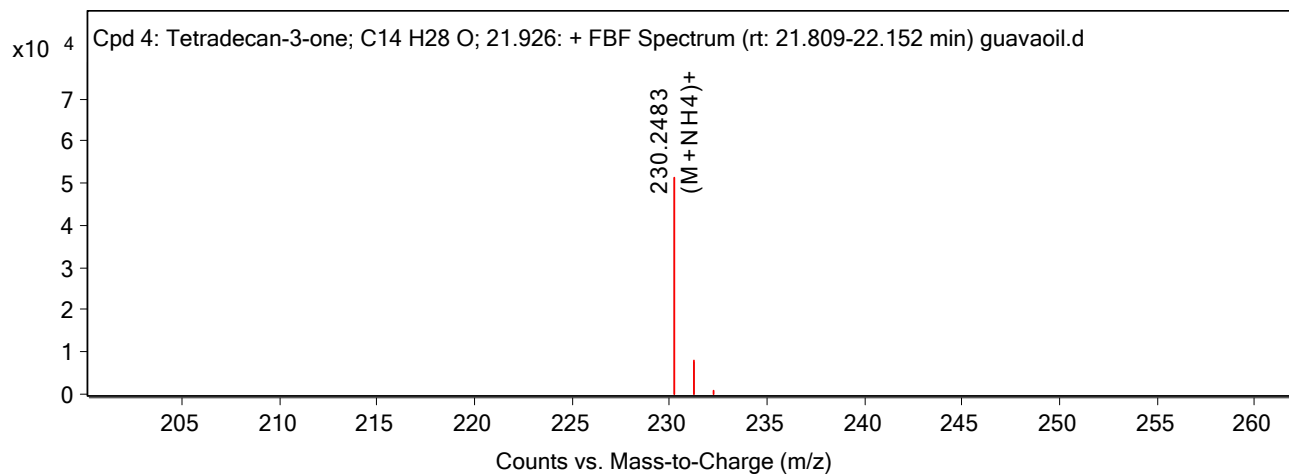

## MS Spectrum Peak List

| Obs. m/z | Charge | Abund    | Ion/Isotope |
|----------|--------|----------|-------------|
| 230.2483 | 1      | 51444.05 | (M+NH4)+    |
| 231.2515 | 1      | 7592.68  | (M+NH4)+    |
| 232.2543 | 1      | 664.83   | (M+NH4)+    |

## MS Zoomed Spectrum

# Target Compound Screening Report

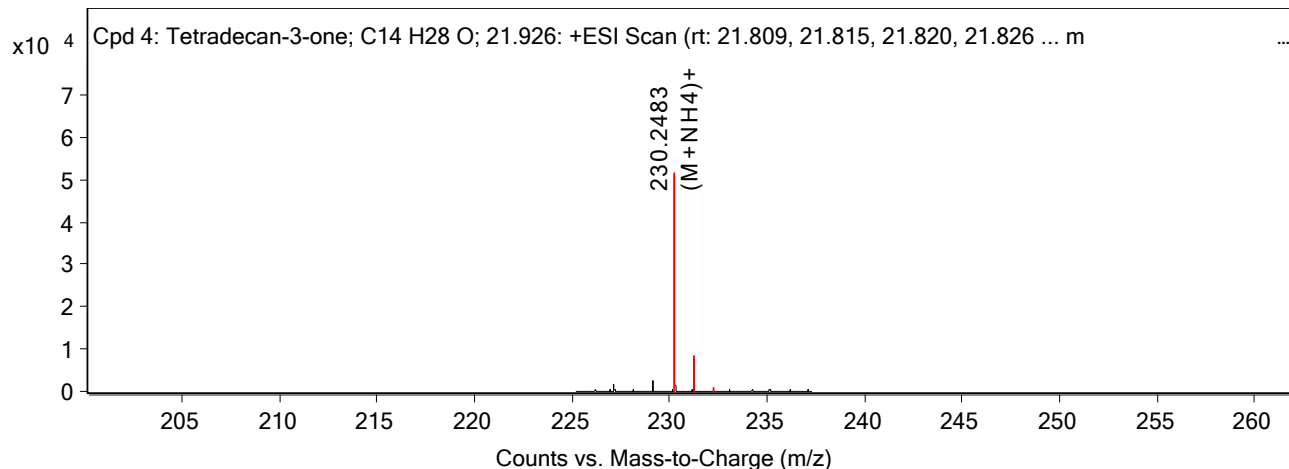

## MS Spectrum Peak List

| Obs. m/z | Charge | Abund    | Ion/Isotope                       | Tgt Mass Error (ppm) |
|----------|--------|----------|-----------------------------------|----------------------|
| 230.2483 |        | 51441.07 |                                   |                      |
| 230.2483 | 1      | 51444.05 | (M+NH <sub>4</sub> ) <sup>+</sup> | -1.91                |
| 231.2515 | 1      | 7592.68  | (M+NH <sub>4</sub> ) <sup>+</sup> | -1.68                |
| 232.2543 | 1      | 664.83   | (M+NH <sub>4</sub> ) <sup>+</sup> | -0.95                |

| Name          | Obs. m/z | Obs. RT | Obs. Mass | Tgt Formula                         | Tgt Mass | Tgt Mass Error (ppm) | Find Cpds Algorithm |
|---------------|----------|---------|-----------|-------------------------------------|----------|----------------------|---------------------|
| Xestoaminol C | 230.2483 | 21.926  | 229.241   | C <sub>14</sub> H <sub>31</sub> N O | 229.2406 | 1.88                 | Find by Formula     |

## Compound Chromatograms

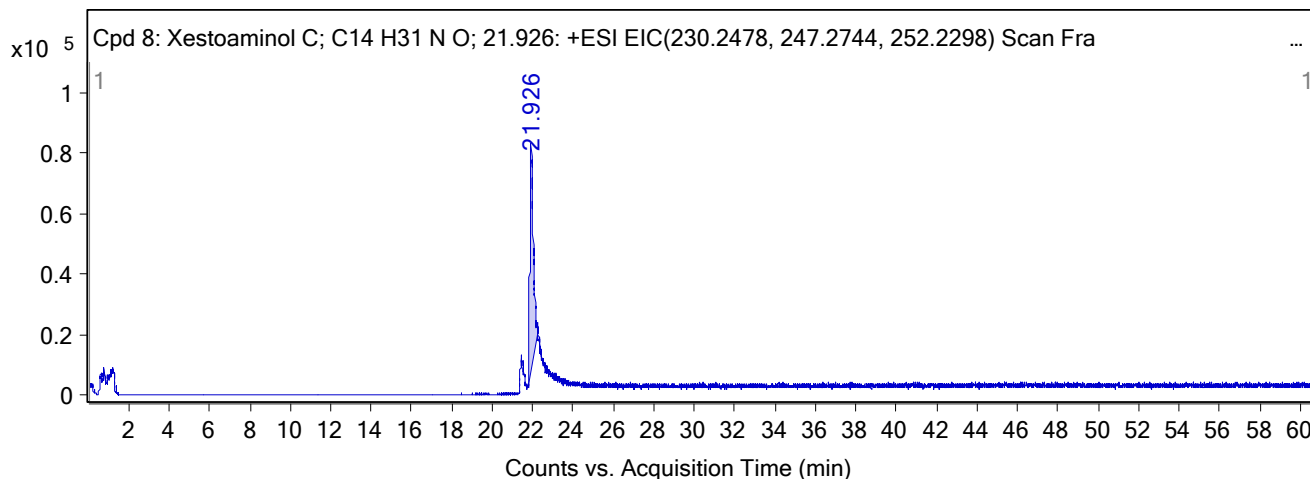

MS Zoomed Spectrum

# Target Compound Screening Report

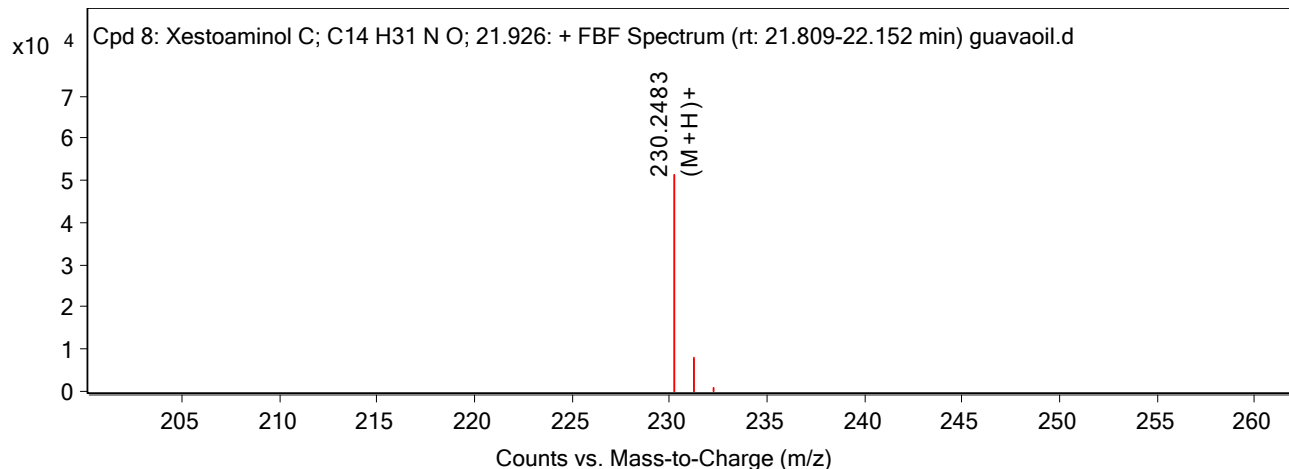

## MS Spectrum Peak List

| Obs. m/z | Charge | Abund    | Ion/Isotope |
|----------|--------|----------|-------------|
| 230.2483 | 1      | 51444.05 | (M+H)+      |
| 231.2515 | 1      | 7592.68  | (M+H)+      |
| 232.2543 | 1      | 664.83   | (M+H)+      |

## MS Zoomed Spectrum

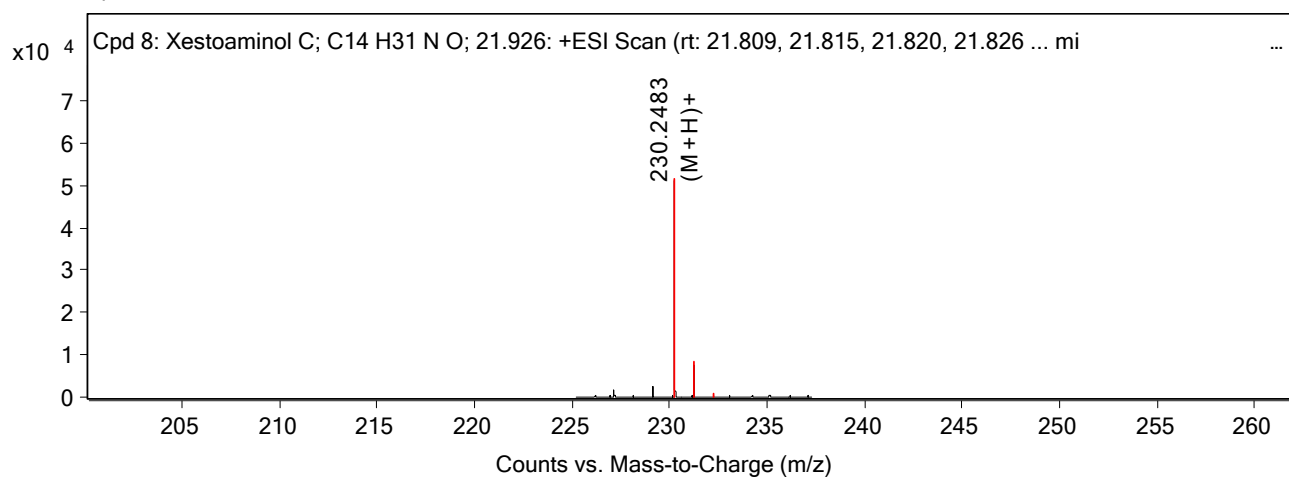

## MS Spectrum Peak List

| Obs. m/z | Charge | Abund    | Ion/Isotope | Tgt Mass Error (ppm) |
|----------|--------|----------|-------------|----------------------|
| 230.2483 |        | 51441.07 |             |                      |
| 230.2483 | 1      | 51444.05 | (M+H)+      | -1.91                |
| 231.2515 | 1      | 7592.68  | (M+H)+      | -1.68                |
| 232.2543 | 1      | 664.83   | (M+H)+      | -0.95                |

--- End Of Report ---
